# Supplementary material for: Isomerization of pirazolopyrimidines to pyrazolopyridines by ring-opening/closing reaction in aqueous NaOH
Source: Royal Society of Chemistry journal article supplement (doi:10.1039/d4ra06345g), 2025-01-01
Supplement: d4ra06345g1.pdf [file d4ra06345g1.pdf]

## Electronic supplementary information (ESI)

### Isomerization of pirazolopyrimidines to pyrazolopyridines by ring-opening/closing reaction in aqueous NaOH

Carlos Cifuentes, Nestor Bravo, Daniel Restrepo, Mario Macías, and Jaime Portilla\*

Department of Chemistry, Universidad de Los Andes, Carrera 1 No. 18A-10, Bogotá 111711, Colombia

\*E-mail: jportill@uniandes.edu.co; Tel: +57 1 3394949. Ext. 2080

### Content

|                                                            |    |
|------------------------------------------------------------|----|
| 1. Overview of substrates and products numbering .....     | 2  |
| 2. Experimental procedures and characterization data ..... | 2  |
| 2.1. General Information .....                             | 3  |
| 2.2. General Procedures.....                               | 3  |
| 3. Data Characterization .....                             | 5  |
| 4. HRMS analysis .....                                     | 11 |
| 5. Copies of NMR spectra.....                              | 33 |
| 6. Crystallographic and photophysical details .....        | 33 |
| 7. Computational studies.....                              | 55 |
| 8. References .....                                        | 60 |

## 1. Overview of substrates and products numbering

### (a) 7-Aryl-3-formylpyrazolo[1,5-*a*]pyrimidines

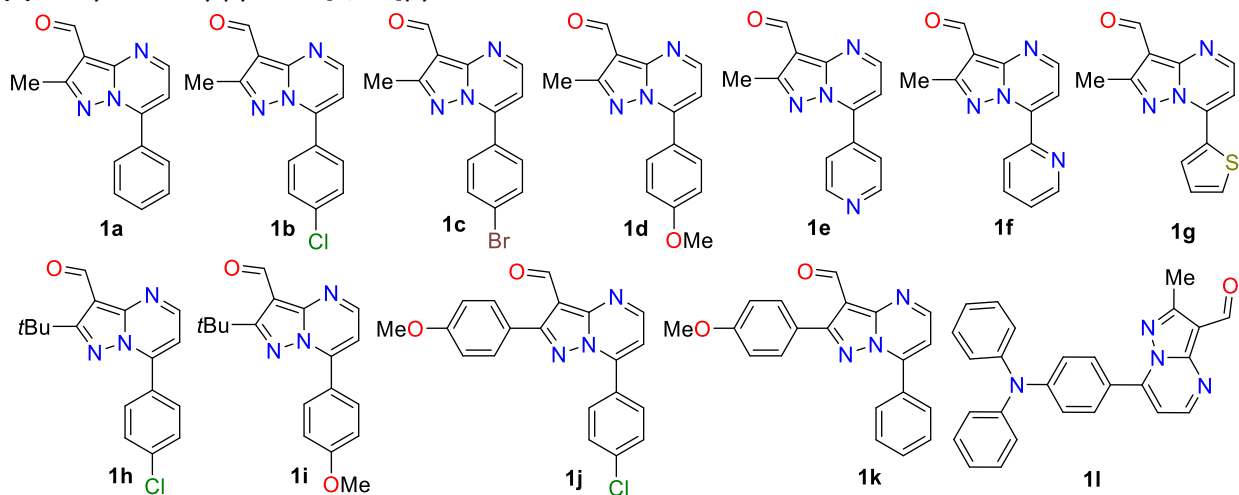

### (b) 5-arylpirazolo[3,4-*b*]pyridines

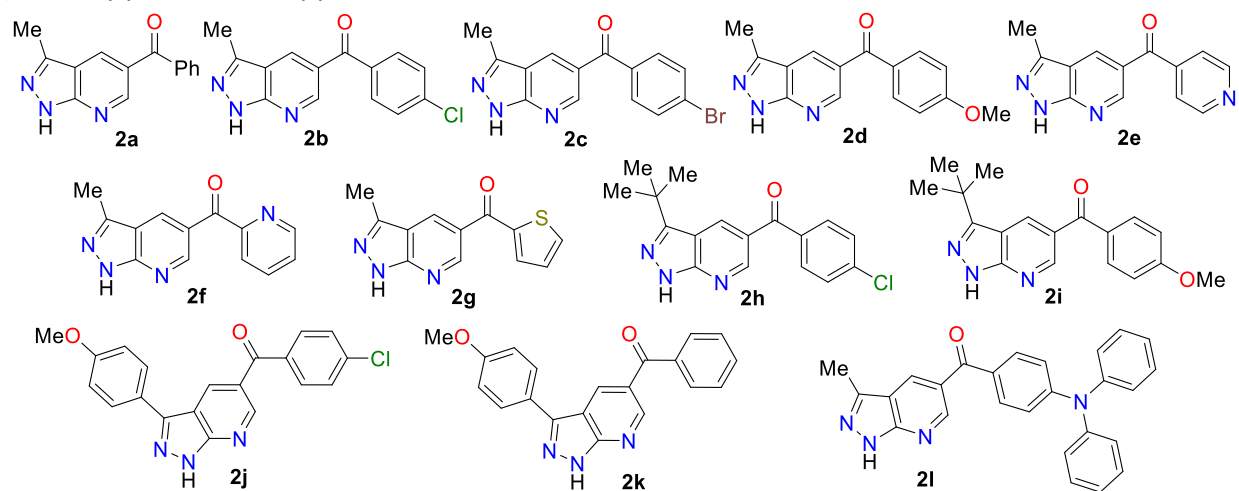

### (c) Functionalized 3-methylpirazolo[3,4-*b*]pyridines

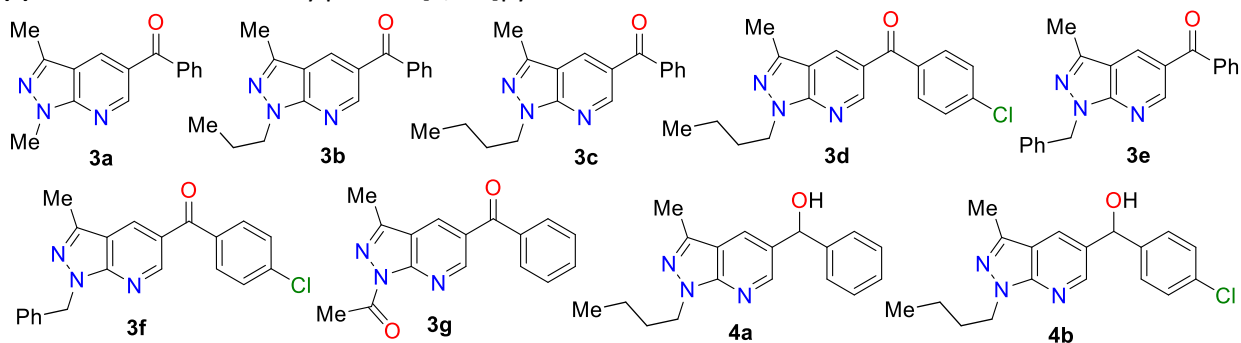

**Fig. S1** Structures of a) substrates 1a-l, b) products 1a-l, and c) functionalized compounds 3a-g and 4a-b

## 2. Experimental procedures and characterization data

### 2.1. General Information

All reagents were purchased from commercial sources and used without further purification unless otherwise noted. All starting materials were weighed and handled under air at room temperature. The reactions were monitored by TLC and visualized by a UV lamp (at 254 or 365 nm). Flash chromatography was performed on silica gel (230–400 mesh) and DCM or DCM/MeOH (60:1 v/v) as eluents. All reactions under microwave (MW) irradiation were performed in a sealed reaction vessel (10 mL, max pressure = 300 psi) having a Teflon-coated stir bar (from CEM). MW-assisted reactions were performed in a CEM Discover SP-focused ME ( $\nu = 2.45$  GHz) reactor equipped with a built-in pressure measurement sensor and a vertically focused IR temperature sensor. Controlled temperature, power, and time settings were used for all reactions.

NMR spectra for this work were recorded at 400 MHz ( $^1\text{H}$ ) and 101 MHz ( $^{13}\text{C}$ ) at 298 K, and data were recorded in  $\text{CDCl}_3$  using as internal standards the residual nondeuterated signal for  $^1\text{H}$  NMR (7.26 ppm) and the deuterated solvent signal for  $^{13}\text{C}$  NMR (77.16 ppm) spectroscopy. DEPT spectra were used to assign carbon signals with the help of 2D experiments. Chemical shifts ( $\delta$ ) are given in parts per million (ppm) and coupling constants ( $J$ ) in Hertz. The following abbreviations are used for multiplicities: s = singlet, d = doublet, t = triplet, q = quartet, dd = doublet of doublets, and m = multiplet. Melting points were determined by a capillary melting point apparatus and were uncorrected. A Q-TOF spectrometer recorded high-resolution mass spectra (HRMS) via electrospray ionization (ESI). The X-ray intensity data were measured at 25(2) °C using  $\text{CuK}\alpha$  radiation ( $\lambda = 1.54184$  Å) by  $\omega$  scans in an Agilent SuperNova, Dual, Cu at Zero, Atlas four-circle diffractometer equipped with a CCD plate detector. Crystallographic data for the structural analysis have been deposited in the Cambridge Crystallographic Data Center (CCDC), with deposition numbers 2358586 for **2a**, 2358587 for **2b**, 2358589 for **2b'** (chalcone), and 2358588 for **3a** (*N*-methyl derivative); copy of this data may be obtained free from CCDC, 12 Union Road, Cambridge, CB2 1EZ, UK (Fax: +44-1223-336033; e-mail: deposit@ccdc.cam.ac.uk). The absorption spectra were measured on a Varian Cary 100 spectrophotometer, while those for emission were recorded using a Cary Eclipse S19 fluorescence spectrophotometer (the two Agilent Technologies devices). UV-vis and fluorescence measurements were performed at room temperature ( $\sim 20$  °C) in quartz cuvettes having a path length of 1 cm. For fluorescence studies, both the excitation and emission slit widths were 5 nm.

### 2.2. General Procedures

#### 2.2.1. General Procedure for the Synthesis of Pyrazolo[1,5-*a*]pyrimidine-3-carbaldehydes **1a-j**.

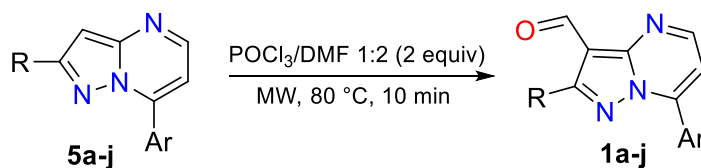

Heteroaldehydes **1a-j** were synthesized in high yields using three MW-assisted reaction steps (*i.e.*, *i.*  $\beta$ -aminones formation, *ii.* their cyclocondensation with aminopyrazoles, and *iii.* formylation reaction) starting from aryl methyl ketones according to protocols previously reported in our investigating group;<sup>1-4</sup> the last step in preparing **5a-j** is described below. A mixture of phosphoryl chloride (2.0 mmol, 187  $\mu$ L) and 310  $\mu$ L of anhydrous *N,N*-dimethylformamide (4 mmol) was added into a sealed tube containing a Teflon-coated magnetic stirring bar and cooled to 0 °C and stirring for 30 min. Later the formylating agent solution was added dropwise to a solution of **4** (1 mmol) in 300  $\mu$ L of DMF under stirring at 0 °C for 10 min; then, the reaction was warmed to room temperature and stirred for 15 min, and finally, the mixture was irradiated with microwaves at 80 °C (100W) for 10 min in a sealed tube under stirring (Teflon-coated magnetic bar). The resulting reaction mixture was cooled to 50 °C by airflow; after, the mixture was maintained at pH = 7 by adding an aqueous solution of NaHCO<sub>3</sub> (20%), and the reaction mixture was vigorously stirred at room temperature for 30 min. The precipitate was filtered, washed with cold water (2  $\times$  5 mL), and purified by flash chromatography on silica gel (eluent DCM) to afford the pure products **1a-l**.

### 2.2.2. General procedure for the synthesis of 5-aryl-NH-pyrazolo[3,4-b]pyridines **2a-l**

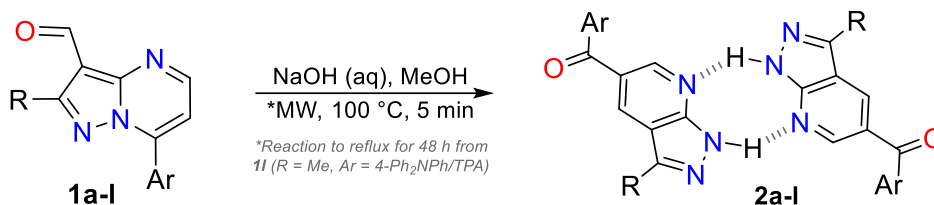

A mixture of **5a-j** (0.5 mmol), NaOH 1M (1 mL, 1 mmol), and 0.5 mL of MeOH was added into a sealed tube containing a Teflon-coated magnetic stirring bar and was irradiated with MW at 100 °C (130W) for 5 min; the reaction from substrate **1l** (R = Me, Ar = TPA) was carried out under reflux for 48 h. The resulting reaction mixture was cooled to 50 °C by airflow, diluted with DCM, and hydrolyzed. The organic layer was separated, and the aqueous layer was extracted thrice with DCM. The combined organic layers were washed with brine, dried over anhydrous Na<sub>2</sub>SO<sub>4</sub>, filtered, and concentrated under vacuum to give the crude product. Flash chromatography of this material silica gel (eluent DCM/MeOH 60:1 v/v) afforded the pure products **2a-l**.

### 2.2.3. General procedure for the synthesis of *N*-substituted pyrazolo[3,4-b]pyridines **3a-f**

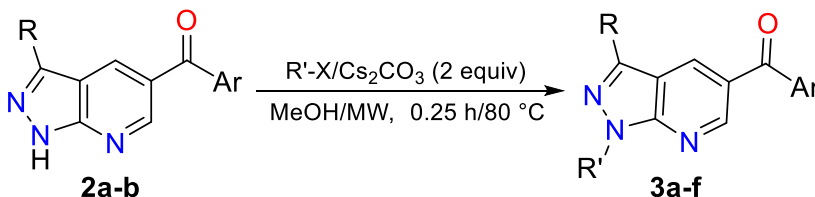

A mixture of caesium carbonate (2 equiv) and **6a-l** (1 equiv) in anhydrous MeCN (2 mL) in a sealed tube and stirred (Teflon-coated magnetic bar) was irradiated at 50 °C for 3 min. To the generated suspension, the respective alkyl halide (R'-X, 2 equiv) was added in one portion, and the resulting mixture was irradiated under MW 80 °C (100W) for 15 min. The resulting reaction mixture was

cooled to 50 °C by airflow, diluted with DCM, and hydrolyzed. The organic layer was separated, and the aqueous layer was extracted thrice with DCM. The combined organic layers were washed with brine, dried over anhydrous sodium sulfate, filtered, and concentrated under vacuum. Flash chromatography of this material silica gel (eluent DCM) yielded the desired products **3a-f**.

#### 2.2.4. General synthesis of 1-acetyl-5-benzoyl-3-methylpyrazolo[3,4-b]pyridine (**3g**)

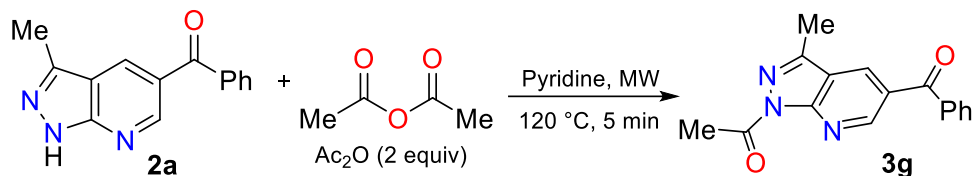

A mixture of caesium **2a** (1 equiv), acetic anhydride ( $\text{Ac}_2\text{O}$ , 2 equiv), and pyridine (2 mL) in a sealed tube was irradiated with MW under stirring (Teflon-coated magnetic bar) at 120 °C (140W) for 5 min. The resulting reaction mixture was cooled to 50 °C by airflow, HCl 5% (5 mL) was added, and the product was extracted with DCM (3 × 7 mL). The organic layer was separated, and the aqueous layer was extracted thrice with DCM. The combined organic layers were washed with brine, dried over anhydrous sodium sulfate, filtered, and concentrated under vacuum to give the crude product. Flash chromatography on silica gel (eluent DCM) afforded the desired product **3g**.

#### 2.2.5. General synthesis of 5-(aryl)hydroxymethyl-1-butylpyrazolo[3,4-b]pyridines **4a-b**

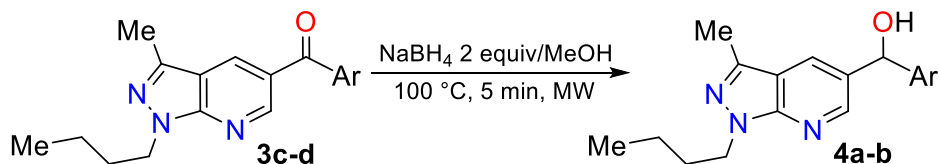

A mixture of **3c-d** (1 equiv),  $\text{NaBH}_4$  (2 equiv), and methanol (2 mL) in a sealed tube was irradiated with MW under stirring (Teflon-coated magnetic bar) at 100 °C (120W) for 5 min. The resulting reaction mixture was cooled to 50 °C by airflow, HCl 5% (5 mL) was added, and the product was extracted with DCM (3 × 7 mL). The organic layer was separated, and the aqueous layer was extracted thrice with DCM. The combined organic layers were washed with brine, dried over anhydrous  $\text{Na}_2\text{SO}_4$ , filtered, and concentrated under vacuum to give the crude product, which was chromatographed (silica gel, eluent DCM) to afford alcohols **4a-b**.

### 3. Data Characterization

(3-Methyl-1H-pyrazolo[3,4-b]pyridin-5-yl)(phenyl)methanone (**2a**). By the general procedure

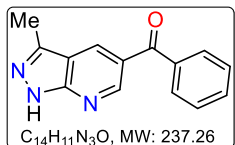

from aldehyde **1a** (118 mg, 0.5 mmol), **2a** was obtained as a yellow solid (106 mg, 90%). Mp 150–151 °C.  $^1\text{H}$  NMR (400 MHz,  $\text{CDCl}_3$ ):  $\delta$  = 2.66 (s, 3H), 7.52–7.83 (m, 5H), 8.59 (s, 1H), 9.07 (s, 1H), 12.91 (s-br, 1H) ppm.  $^{13}\text{C}\{^1\text{H}\}$  NMR (100 MHz,  $\text{CDCl}_3$ ):  $\delta$  = 12.7 (CH<sub>3</sub>), 114.6 (C), 126.6 (C), 128.8 (CH), 130.0 (CH), 132.9 (CH), 133.0 (CH), 137.6 (C), 144.7 (C), 151.2 (CH), 153.5 (C), 194.9 (C) ppm. HRMS (ESI)  $m/z$ :  $[\text{M} + \text{H}]^+$  calcd. for  $\text{C}_{14}\text{H}_{12}\text{N}_3\text{O}^+$  238.0975; found 238.0979.

**(4-Chlorophenyl)(3-methyl-1H-pyrazolo[3,4-b]pyridin-5-yl)methanone (2b)**. By the general route from aldehyde **1b** (136 mg, 0.5 mmol), **2b** was obtained as a yellow solid (126 mg, 91%). Mp 203–204 °C. <sup>1</sup>H NMR (400 MHz, CDCl<sub>3</sub>): δ = 2.66 (s, 3H), 7.52 (d, *J* = 8.0 Hz, 2H), 7.78 (d, *J* = 8.0 Hz, 2H), 8.55 (d, *J* = 2.0 Hz, 1H) ppm, 9.04 (d, *J* = 2.0 Hz, 1H) ppm, 12.72 (s-br, 1H). <sup>13</sup>C{<sup>1</sup>H} NMR (100 MHz, CDCl<sub>3</sub>): δ = 12.8 (CH<sub>3</sub>), 114.6 (C), 126.3 (C), 129.1 (CH), 131.4 (CH), 132.9 (CH), 135.9 (CH), 139.4 (C), 144.8 (C), 151.0 (CH), 153.5 (C), 193.7 (C) ppm. HRMS (ESI) *m/z*: [M + H]<sup>+</sup> calcd. for C<sub>14</sub>H<sub>11</sub><sup>35</sup>ClN<sub>3</sub>O<sup>+</sup> 272.0585; found 272.0598.

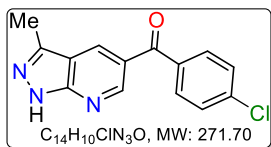

**(4-Bromophenyl)(3-methyl-1H-pyrazolo[3,4-b]pyridin-5-yl)methanone (2c)**. By the general route from **1c** (158 mg, 0.5 mmol), **2c** was obtained as a yellow solid (134 mg, 85%). Mp 206–207 °C. <sup>1</sup>H NMR (400 MHz, CDCl<sub>3</sub>): δ = 2.65 (s, 3H), 7.71 (s, 4H), 8.53/9.02 (d, *J* = 2.0 Hz, 1H/1H), 11.65 (s-br, 1H) ppm. <sup>13</sup>C{<sup>1</sup>H} NMR (100 MHz, CDCl<sub>3</sub>): δ = 12.8 (CH<sub>3</sub>), 114.5 (C), 126.4 (C), 128.1 (C), 131.5 (CH), 132.1 (CH), 132.7 (CH), 136.4 (C), 145.0 (C), 151.2 (CH), 153.6 (C), 193.9 (C) ppm. HRMS (ESI) *m/z*: [M + H]<sup>+</sup> calcd. for C<sub>14</sub>H<sub>11</sub><sup>79</sup>BrN<sub>3</sub>O<sup>+</sup> 316.0080; found 316.0095.

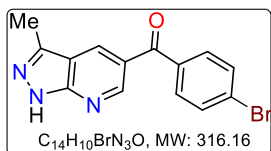

**(4-Methoxyphenyl)(3-methyl-1H-pyrazolo[3,4-b]pyridin-5-yl)methanone (2d)**. By the general procedure from aldehyde **1d**, (133 mg, 0.5 mmol), **2d** was obtained as a yellow solid (84 mg, 63%). Mp 169–170 °C. <sup>1</sup>H NMR (400 MHz, CDCl<sub>3</sub>): δ = 2.66 (s, 3H), 3.91 (s, 3H), 7.02 (d, *J* = 8.0 Hz, 2H), 7.85 (d, *J* = 8.0 Hz, 2H), 8.54 (d, *J* = 2.0 Hz, 1H), 9.02 (d, *J* = 2.0 Hz, 1H), 12.49 (s-br, 1H). <sup>13</sup>C{<sup>1</sup>H} NMR (100 MHz, CDCl<sub>3</sub>): δ = 12.8 (CH<sub>3</sub>), 55.7 (CH<sub>3</sub>), 114.0 (CH), 114.5 (C), 127.3 (C), 130.2 (C), 132.6 (CH), 144.6 (C), 151.0 (CH), 153.4 (C), 163.6 (C), 193.6 (C) ppm. HRMS (ESI) *m/z*: [M + H]<sup>+</sup> calcd. for C<sub>15</sub>H<sub>14</sub>N<sub>3</sub>O<sub>2</sub><sup>+</sup> 268.1080; found 268.1079.

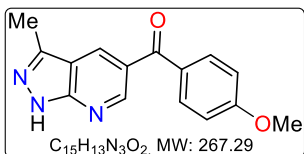

**(3-Methyl-1H-pyrazolo[3,4-b]pyridin-5-yl)(pyridin-4-yl)methanone (2e)**. By the general method from aldehyde **1e** (119 mg, 0.5 mmol), **2e** was obtained as a yellow solid (77 mg, 65%). Mp 194–196 °C. <sup>1</sup>H NMR (400 MHz, CDCl<sub>3</sub>): δ = 2.67 (s, 3H), 7.63 (d, *J* = 8.0 Hz, 2H), 8.58 (s, 1H), 8.90 (d, *J* = 8.0 Hz, 1H), 9.08 (s, 1H) ppm, 12.81 (s-br, 1H). <sup>13</sup>C{<sup>1</sup>H} NMR (100 MHz, CDCl<sub>3</sub>): δ = 12.8 (CH<sub>3</sub>), 114.7 (C), 122.9 (CH), 125.2 (C), 133.2 (CH), 144.5 (C), 145.2 (C), 150.8 (CH), 151.2 (CH), 153.8 (C), 193.5 (C) ppm. HRMS (ESI) *m/z*: [M + H]<sup>+</sup> calcd. for C<sub>13</sub>H<sub>11</sub>N<sub>4</sub>O<sup>+</sup> 239.0927; found 239.0935.

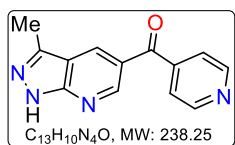

**(3-Methyl-1H-pyrazolo[3,4-b]pyridin-5-yl)(pyridin-2-yl)methanone (2f)**. By the general way from **1f** (119 mg, 0.5 mmol), **2f** was obtained as a yellow solid (74 mg, 62%). Mp 187–188 °C (amorphous). <sup>1</sup>H NMR (400 MHz, CDCl<sub>3</sub>): δ = 2.66 (s, 3H), 7.55 (td, *J* = 7.78 Hz, 1.72 Hz, 1H), 7.96 (td, *J* = 7.78 Hz, 1.72 Hz, 1H), 8.165 (d, 1H), 8.775 (d, 1H), 8.96 (d, *J* = 1.96 Hz, 1H), 9.42 (d, *J* = 1.96 Hz, 1H) ppm, 12.90 (s-br, 1H). <sup>13</sup>C{<sup>1</sup>H} NMR (100 MHz, CDCl<sub>3</sub>): δ = 12.8 (CH<sub>3</sub>), 114.6 (C), 124.9 (CH), 125.5 (C), 126.8

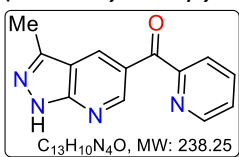

(CH), 134.3 (CH), 137.5 (CH), 145.0 (C), 148.7 (CH), 152.4 (CH), 153.5 (C), 154.8 (C), 191.6 (C) ppm. HRMS (ESI) m/z: [M + H]<sup>+</sup> calcd. for C<sub>13</sub>H<sub>11</sub>N<sub>4</sub>O<sup>+</sup> 239.0927; found 239.0929.

(3-Methyl-1H-pyrazolo[3,4-b]pyridin-5-yl)(thiophen-2-yl)methanone (**2g**). By the general method

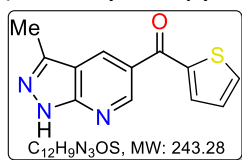

from **1g** (121 mg, 0.5 mmol), **2g** was obtained as a yellow solid (79 mg, 65%). Mp 182–183 °C. <sup>1</sup>H NMR (400 MHz, CDCl<sub>3</sub>): δ = 2.68 (s, 3H), 7.23 (t, *J* = 4.0 Hz, 1H), 7.72 (d, *J* = 4.0 Hz, 1H), 7.80 (d, *J* = 4.0 Hz, 1H), 8.64 (d, *J* = 1.9 Hz, 1H), 9.15 (d, *J* = 2.08 Hz, 1H), 12.42 (s-br, 1H) ppm. <sup>13</sup>C{<sup>1</sup>H} NMR (100 MHz, CDCl<sub>3</sub>): δ = 12.8 (CH<sub>3</sub>), 114.6 (C), 127.3 (C), 128.4 (CH), 132.8 (CH), 134.7 (CH), 134.8 (CH), 143.4 (C), 144.7 (C), 150.3 (CH), 153.6 (C), 186.1 (C) ppm. HRMS (ESI) m/z: [M + H]<sup>+</sup> calcd. for C<sub>12</sub>H<sub>10</sub>N<sub>3</sub>OS<sup>+</sup> 244.0539; found 244.0541.

(3-(tert-Butyl)-1H-pyrazolo[3,4-b]pyridin-5-yl)(4-chlorophenyl)methanone (**2h**). By the general

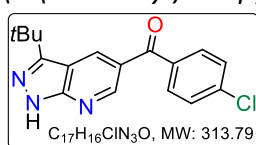

method from **1h** (157 mg, 0.5 mmol), **2h** was obtained as a yellow solid (136 mg, 87%). Mp 203–204 °C. <sup>1</sup>H NMR (400 MHz, CDCl<sub>3</sub>): δ = 1.55 (s, 9H), 7.53 (d, *J* = 8.0 Hz, 2H), 7.79 (d, *J* = 8.0 Hz, 2H), 8.76 (s, 1H), 9.02 (s, 1H), 12.79 (s-br, 1H) ppm. <sup>13</sup>C{<sup>1</sup>H} NMR (100 MHz, CDCl<sub>3</sub>): δ = 30.2 (CH<sub>3</sub>), 34.6 (C), 112.7 (C), 125.9 (C), 129.1 (CH), 131.4 (CH), 134.5 (CH), 136.0 (C), 139.4 (C), 150.6 (CH), 154.1 (C), 156.2 (C), 193.7 (C) ppm. HRMS (ESI) m/z: [M + H]<sup>+</sup> calcd. for C<sub>17</sub>H<sub>17</sub>ClN<sub>3</sub>O<sup>+</sup> 314.1054; found 314.1049.

(3-(tert-Butyl)-1H-pyrazolo[3,4-b]pyridin-5-yl)(4-methoxyphenyl)methanone (**2i**). By the general

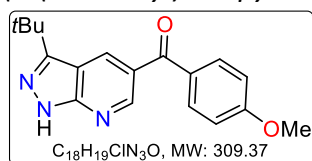

route from **1i** (155 mg, 0.5 mmol), **2i** was obtained as a yellow solid (116 mg, 75%). Mp 1856–186 °C. <sup>1</sup>H NMR (400 MHz, CDCl<sub>3</sub>): δ = 1.56 (s, 9H), 3.92 (s, 3H), 7.02 (d, *J* = 8.0 Hz, 2H), 7.86 (d, *J* = 8.0 Hz, 2H), 8.73 (d, *J* = 2.0 Hz, 1H), 9.02 (d, *J* = 2.0 Hz, 1H), 12.6 (s-br, 1H) ppm. <sup>13</sup>C{<sup>1</sup>H} NMR (100 MHz, CDCl<sub>3</sub>): δ = 30.2 (CH<sub>3</sub>), 34.5 (C), 55.7 (CH<sub>3</sub>), 112.5 (C), 114.0 (CH), 126.8 (C), 130.3 (C), 132.6 (CH), 134.2 (CH), 150.5 (CH), 154.0 (C), 155.9 (C), 163.6 (C), 193.6 (C) ppm. HRMS (ESI) m/z: [M + H]<sup>+</sup> calcd. for C<sub>18</sub>H<sub>20</sub>N<sub>3</sub>O<sub>2</sub><sup>+</sup> 310.1550; found 310.1568.

(4-Chlorophenyl)(3-(4-methoxyphenyl)-1H-pyrazolo[3,4-b]pyridin-5-yl)methanone (**2j**). By the

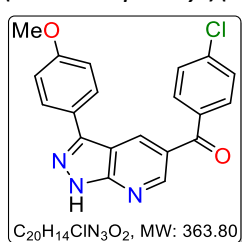

general route from **1j** (181 mg, 0.5 mmol), **2j** was obtained as a yellow solid (149 mg, 82%). Mp 206–207 °C. <sup>1</sup>H NMR (400 MHz, CDCl<sub>3</sub>): δ = 3.89 (s, 3H), 7.06 (d, *J* = 8.0 Hz, 2H), 7.53 (d, *J* = 8.0 Hz, 2H), 7.80 (d, *J* = 8.0 Hz, 2H), 7.91 (d, *J* = 12.0 Hz, 2H), 8.84/9.07 (d, *J* = 2.0 Hz, 1H/1H), 12.77 (s-br, 1H) ppm. <sup>13</sup>C{<sup>1</sup>H} NMR (100 MHz, CDCl<sub>3</sub>): δ = 55.6 (CH<sub>3</sub>), 113.0 (C), 114.8 (CH), 124.9 (C), 127.1 (C), 128.7 (CH), 129.2 (CH), 131.5 (CH), 134.0 (CH), 135.8 (C), 139.5 (C), 146.6 (C), 151.0 (CH), 153.9 (C), 160.6 (C), 193.5 (C) ppm. HRMS (ESI) m/z: [M + H]<sup>+</sup> calcd. for C<sub>20</sub>H<sub>15</sub>ClN<sub>3</sub>O<sub>2</sub><sup>+</sup> 364.0847; found 364.0859.

**(3-(4-Methoxyphenyl)-1H-pyrazolo[3,4-b]pyridin-5-yl)(phenyl)methanone (2k)**. By the general route from **1k** (164 mg, 0.5 mmol), **2k** was obtained as a yellow solid (125 mg, 76%). Mp 206–208 °C. <sup>1</sup>H NMR (400 MHz, CDCl<sub>3</sub>): δ = 3.88 (s, 3H), 7.06 (d, *J* = 8.0 Hz, 2H), 7.56 (t, *J* = 8.0 Hz, 2H), 7.67 (t, *J* = 4.0 Hz, 1H), 7.86 (d, *J* = 8.0 Hz, 2H), 7.93 (d, *J* = 8.0 Hz, 2H), 8.89/9.11 (d, *J* = 2.0 Hz, 1H/1H), 12.71 (s-br, 1H) ppm. <sup>13</sup>C{<sup>1</sup>H} NMR (100 MHz, CDCl<sub>3</sub>): δ = 55.6 (CH<sub>3</sub>), 112.9 (C), 114.7 (CH), 125.0 (C), 127.5 (C), 128.7 (CH), 128.8 (CH), 130.1 (CH), 133.0 (CH), 134.0 (CH), 137.6 (C), 146.7 (C), 151.3 (CH), 153.9 (C), 160.5 (C), 194.8 (C) ppm. HRMS (ESI) *m/z*: [M + H]<sup>+</sup> calcd. for C<sub>20</sub>H<sub>16</sub>N<sub>3</sub>O<sub>2</sub><sup>+</sup> 330.1237; found 330.1248.

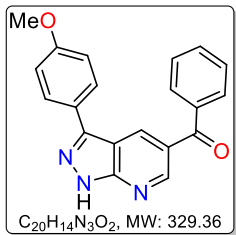

**(4-(Diphenylamino)phenyl)(3-methyl-1H-pyrazolo[3,4-b]pyridin-5-yl)methanone (2l)**. By the general way from **1l** (202 mg, 0.5 mmol) but under reflux for 48 h, **2l** was obtained as a bright yellow solid (101 mg, 50%). Mp 181–182 °C. <sup>1</sup>H NMR (400 MHz, CDCl<sub>3</sub>): δ = 2.66 (s, 3H), 7.05 (d, *J* = 8.7 Hz, 2H), 7.14–7.22 (m, 6H), 7.35 (t, *J* = 8.0 Hz, 4H), 7.72 (d, *J* = 8.7 Hz, 2H), 8.56 (s, 1H), 9.04 (s, 1H), 12.41 (s-br, 1H) ppm. <sup>13</sup>C{<sup>1</sup>H} NMR (100 MHz, CDCl<sub>3</sub>): δ = 12.8 (CH<sub>3</sub>), 114.6 (C), 119.6 (CH), 125.0 (CH), 126.3 (CH), 127.6 (C), 129.0 (C), 129.8 (CH), 132.0 (CH), 132.4 (CH), 144.5 (C), 146.5 (C), 150.9 (CH), 153.5 (C), 193.1 (C) ppm. HRMS (ESI) *m/z*: [M + H]<sup>+</sup> calcd. for C<sub>26</sub>H<sub>21</sub>N<sub>4</sub>O<sup>+</sup> 405.1710; found 405.1722.

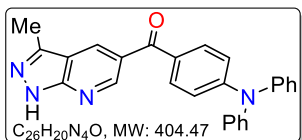

**(E)-1-(4-Chlorophenyl)-3-(7-(4-chlorophenyl)-2-methylpyrazolo[1,5-a]pyrimidin-3-yl)prop-2-en-1-one (2b')** & **5-amino-3-methyl-1H-pyrazole-4-carbaldehyde (2b'')**. By the general route with **1b** (108 mg, 0.5 mmol) but at 70 °C for 0.5 h, **2b'** and **2b''** were obtained as yellow and orange solids and were chromatographed using DCM and DCM/MeOH (50:1) como eluents, respectively. For **2b'**, 17 mg, 17%; mp 260–261 °C (Lit.<sup>2</sup> 259–260 °C); <sup>1</sup>H NMR (400 MHz, CDCl<sub>3</sub>): δ = 2.65 (s, 3H), 7.00 (d, *J* = 4.0 Hz, 1H) ppm, 7.49 (d, *J* = 8.0 Hz, 2H) ppm, 7.57 (d, *J* = 8.0 Hz, 2H) ppm, 8.02–8.09 (m, 5H) ppm, 8.24 (d, *J* = 16.0 Hz, 1H) ppm, 8.695 (d, *J* = 4.0 Hz, 1H) ppm. These data matched those previously reported in our research group.<sup>2</sup> For **2b''**, 8 mg, 13%; mp 133–134 °C; <sup>1</sup>H NMR (400 MHz, CDCl<sub>3</sub>): δ = 2.37 (s, 3H), 5.56 (s, 2H) ppm, 9.67 (s, 1H) ppm; <sup>13</sup>C{<sup>1</sup>H} NMR (100 MHz, CDCl<sub>3</sub>): δ = 10.9 (CH<sub>3</sub>), 106.5 (C), 148.0 (C), 154.3 (C), 184.3 (C); HRMS (ESI) *m/z*: [M + H]<sup>+</sup> calcd. for C<sub>5</sub>H<sub>8</sub>N<sub>3</sub>O<sup>+</sup> 126.0662; found 126.0659.

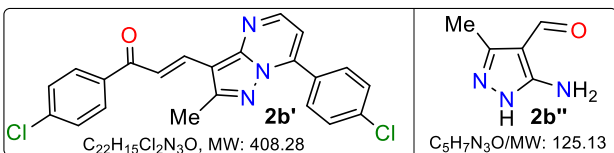

**(1,3-Dimethyl-1H-pyrazolo[3,4-b]pyridin-5-yl)(phenyl)methanone (3a)**. By the general procedure from **2a** (118 mg, 0.5 mmol), Cs<sub>2</sub>CO<sub>3</sub> (325 mg, 1 mmol), and iodomethane (CH<sub>3</sub>I, 141 mg, 1 mmol), **3a** was obtained as a colorless oil-solid (109 mg, 87%). <sup>1</sup>H NMR (400 MHz, CDCl<sub>3</sub>): δ = 2.60 (s, 3H), 4.13 (s, 3H), 7.53 (t, *J* = 8.0 Hz, 2H), 7.64 (t, *J* = 7.5 Hz, 1H), 7.81 (d, *J* = 7.0 Hz, 2H), 8.48 (d, *J* = 1.96 Hz, 1H), 9.00 (d, *J* = 1.96 Hz, 1H) ppm. <sup>13</sup>C{<sup>1</sup>H} NMR (100 MHz, CDCl<sub>3</sub>): δ = 12.6 (CH<sub>3</sub>), 33.9 (CH<sub>3</sub>), 114.5 (C), 126.1 (C), 128.7 (CH), 130.0 (CH), 132.7 (CH), 132.8 (CH), 137.8 (C), 143.0 (C), 151.2 (CH),

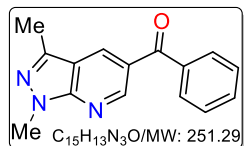



152.0 (C), 195.1 (C) ppm. HRMS (ESI)  $m/z$ :  $[M + H]^+$  calcd. for  $C_{15}H_{14}N_3O^+$  252.1131; found 252.1142.

**(3-Methyl-1-propyl-1H-pyrazolo[3,4-b]pyridin-5-yl)(phenyl)methanone (3b)**. By the general way

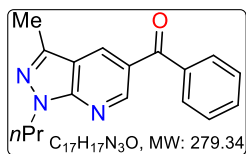

from **2a** (118 mg, 0.5 mmol),  $CS_2CO_3$  (325 mg, 1 mmol), and  $n-C_3H_7Br$  (137 mg, 1 mmol), **3b** was obtained as a yellow oil (126 mg, 90%).  $^1H$  NMR (400 MHz,  $CDCl_3$ ):  $\delta$  = 0.95 (t,  $J$  = 7.2 Hz, 3H), 1.98 (m, 2H), 2.60 (s, 3H), 4.46 (t,  $J$  = 7.4 Hz, 2H), 7.53 (t,  $J$  = 8.0 Hz, 2H), 7.62 (t,  $J$  = 8.0 Hz, 1H), 7.81 (d,  $J$  = 8.0 Hz, 2H), 8.47 (d,  $J$  = 2.0 Hz, 1H) ppm, 8.98 (d,  $J$  = 2.0 Hz, 1H) ppm.  $^{13}C\{^1H\}$  NMR (100 MHz,  $CDCl_3$ ):  $\delta$  = 11.4 (CH<sub>3</sub>), 12.6 (CH<sub>3</sub>), 23.3 (CH<sub>2</sub>), 48.8 (CH<sub>2</sub>), 114.5 (C), 126.1 (C), 128.7 (CH), 130.0 (CH), 132.6 (CH), 132.7 (CH), 137.9 (C), 142.8 (C), 151.0 (CH), 151.9 (C), 195.1 (C) ppm. HRMS (ESI)  $m/z$ :  $[M + H]^+$  calcd. for  $C_{17}H_{18}N_3O^+$  280.1444; found 280.1444.

**(1-Butyl-3-methyl-1H-pyrazolo[3,4-b]pyridin-5-yl)(phenyl)methanone (3c)**. By the general route

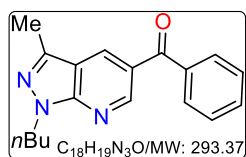

from **2a** (118 mg, 0.5 mmol),  $CS_2CO_3$  (325 mg, 1 mmol), and  $n-C_4H_9Br$  (151 mg, 1 mmol), **3c** was obtained as a yellow oil (126 mg, 86%).  $^1H$  NMR (400 MHz,  $CDCl_3$ ):  $\delta$  = 0.95 (t,  $J$  = 7.4 Hz, 3H), 1.36 (m, 2H), 1.94 (m, 2H), 2.59 (s, 3H), 4.49 (t,  $J$  = 7.2 Hz, 2H), 7.52 (t,  $J$  = 8.0 Hz, 2H), 7.63 (t,  $J$  = 8.0 Hz, 1H), 7.81 (d,  $J$  = 8.0 Hz, 2H), 8.45/8.97 (d,  $J$  = 2.1 Hz, 1H/1H) ppm.  $^{13}C\{^1H\}$  NMR (100 MHz,  $CDCl_3$ ):  $\delta$  = 12.6 (CH<sub>3</sub>), 13.8 (CH<sub>3</sub>), 20.1 (CH<sub>2</sub>), 31.9 (CH<sub>2</sub>), 46.9 (CH<sub>2</sub>), 114.4 (C), 126.0 (C), 128.7 (CH), 130.0 (CH), 132.6 (CH), 132.7 (CH), 137.8 (C), 142.8 (C), 151.0 (CH), 151.7 (C), 195.1 (C) ppm. HRMS (ESI)  $m/z$ :  $[M + H]^+$  calcd. for  $C_{18}H_{20}N_3O^+$  294.1601; found 294.1603.

**(1-Butyl-3-methyl-1H-pyrazolo[3,4-b]pyridin-5-yl)(4-chlorophenyl)methanone (3d)**. By the

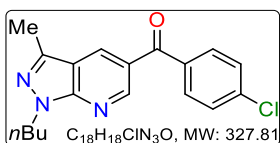

general way, **3d** was obtained as a yellow oil (139 mg, 85%) from **2b** (136 mg, 0.5 mmol),  $CS_2CO_3$  (325 mg, 1 mmol), and  $n-C_4H_9Br$  (151 mg, 1 mmol).  $^1H$  NMR (400 MHz,  $CDCl_3$ ):  $\delta$  = 0.95 (t,  $J$  = 7.4 Hz, 3H), 1.35 (m, 2H), 1.93 (m, 2H), 2.59 (s, 3H), 4.48 (t,  $J$  = 7.2 Hz, 2H), 7.50 (d,  $J$  = 8.7 Hz, 2H), 7.75 (d,  $J$  = 8.7 Hz, 2H), 8.42 (d,  $J$  = 2.0 Hz, 1H), 8.94 (d,  $J$  = 2.0 Hz, 1H) ppm.  $^{13}C\{^1H\}$  NMR (100 MHz,  $CDCl_3$ ):  $\delta$  = 12.6 (CH<sub>3</sub>), 13.8 (CH<sub>3</sub>), 20.1 (CH<sub>2</sub>), 31.9 (CH<sub>2</sub>), 47.0 (CH<sub>2</sub>), 114.5 (C), 125.7 (C), 129.0 (CH), 131.4 (CH), 132.5 (CH), 136.1 (C), 139.2 (C), 142.9 (C), 150.8 (CH), 151.8 (C), 193.8 (C) ppm. HRMS (ESI)  $m/z$ :  $[M + H]^+$  calcd. for  $C_{18}H_{19}^{35}ClN_3O^+$  328.1211; found 328.1214.

**(1-Benzyl-3-methyl-1H-pyrazolo[3,4-b]pyridin-5-yl)(phenyl)methanone (3e)**. By the general route

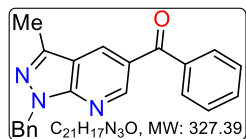

from **2a** (118 mg, 0.5 mmol),  $CS_2CO_3$  (325 mg, 1 mmol), and benzyl bromide ( $PhCH_2Br$ , 171 mg, 1 mmol), **3e** was obtained as a yellow solid (147 mg, 90%). Mp 127–128 °C.  $^1H$  NMR (400 MHz,  $CDCl_3$ ):  $\delta$  = 2.59 (s, 3H), 5.69 (s, 2H), 7.26–7.38 (m, 5H) ppm, 7.53 (t,  $J$  = 8.0 Hz, 2H), 7.64 (t,  $J$  = 8.0 Hz, 1H), 7.82 (d,  $J$  = 8.0 Hz, 2H), 8.48 (d,  $J$  = 2.1 Hz, 1H), 9.02 (d,  $J$  = 2.1 Hz, 1H) ppm.  $^{13}C\{^1H\}$  NMR (100 MHz,  $CDCl_3$ ):  $\delta$  = 12.7 (CH<sub>3</sub>), 50.8 (CH<sub>2</sub>), 114.7 (C), 126.3 (C), 127.9 (CH), 128.0 (CH), 128.6 (CH), 128.8 (CH), 130.0 (CH), 132.6 (C), 132.7 (C), 136.8 (C), 137.7 (C) ppm, 143.5 (C), 151.3 (CH) ppm, 151.9 (C) ppm, 195.0 (C) ppm. HRMS (ESI)  $m/z$ :  $[M + H]^+$  calcd. for  $C_{21}H_{18}N_3O^+$  328.1444; found 328.1444.

(1-Benzyl-3-methyl-1H-pyrazolo[3,4-b]pyridin-5-yl)(4-chlorophenyl)methanone (**3f**). By the

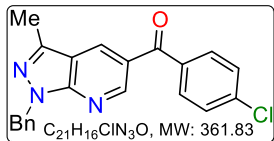

general protocol from **2a** (136 mg, 0.5 mmol), Cs<sub>2</sub>CO<sub>3</sub> (325 mg, 1 mmol), and PhCH<sub>2</sub>Br (171 mg, 1 mmol), **3f** was obtained as a yellow solid (139 mg, 85%). Mp 181–182 °C. <sup>1</sup>H NMR (400 MHz, CDCl<sub>3</sub>): δ = 2.60 (s, 3H), 5.69 (s, 2H), 7.25–7.38 (m, 5H), 7.51 (d, *J* = 8.0 Hz, 2H), 7.77 (d, *J* = 8.0 Hz, 2H),

8.44 (d, *J* = 2.1 Hz, 1H), 8.98 (d, *J* = 2.1 Hz, 1H) ppm. <sup>13</sup>C{<sup>1</sup>H} NMR (100 MHz, CDCl<sub>3</sub>): δ = 12.7 (CH<sub>3</sub>), 50.9 (CH<sub>2</sub>), 114.7 (C), 126.1 (C), 128.0 (CH), 128.1 (CH), 128.8 (CH), 129.0 (CH), 131.4 (CH), 132.5 (CH), 136.1 (C), 136.8 (C) ppm, 139.3 (C), 143.5 (C) ppm, 151.1 (CH) ppm, 152.0 (C) ppm, 193.8 (C) ppm. HRMS (ESI) *m/z*: [M + H]<sup>+</sup> calcd. for C<sub>21</sub>H<sub>17</sub><sup>35</sup>ClN<sub>3</sub>O<sup>+</sup> 362.1055; found 362.1068.

1-(5-benzoyl-3-methyl-1H-pyrazolo[3,4-b]pyridin-1-yl)ethan-1-one (**3g**). By the general protocol

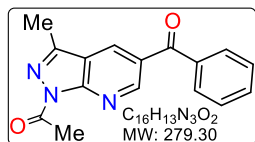

from **2b** (59 mg, 0.25 mmol) and acetic anhydride (51 mg, 0.5 mmol) in 2 mL of pyridine, **3g** was obtained as with oil (59 mg, 85%). <sup>1</sup>H NMR (400 MHz, CDCl<sub>3</sub>): δ = 2.65 (s, 3H), δ = 2.90 (s, 3H), 7.54 (t, *J* = 7.8 Hz, 2H), 7.67 (t, *J* = 7.5 Hz, 1H), 7.83 (d, *J* = 8.0 Hz, 2H), 8.53 (s, 1H), 9.13 (s, 1H) ppm

<sup>13</sup>C{<sup>1</sup>H} NMR (100 MHz, CDCl<sub>3</sub>): δ = 12.9 (CH<sub>3</sub>), δ = 24.4 (CH<sub>3</sub>), 118.4 (C), 128.9 (CH), 129.5 (C), 130.2 (CH), 132.0 (CH), 133.5 (CH), 136.9 (C), 147.9 (C), 152.5 (CH), 153.1 (C), 194.2 (C) ppm. HRMS (ESI) *m/z*: [M + H]<sup>+</sup> calcd. for C<sub>16</sub>H<sub>14</sub>N<sub>3</sub>O<sub>2</sub><sup>+</sup> 280.1081 [M + H]<sup>+</sup>; found 280.1081.

(1-Butyl-3-methyl-1H-pyrazolo[3,4-b]pyridin-5-yl)(phenyl)methanol (**4a**). By the general

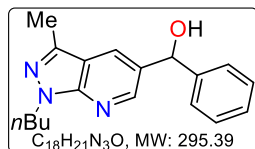

procedure from **3c** (73 mg, 0.25 mmol) and NaBH<sub>4</sub> (18 mg, 0.5 mmol), **4g** was obtained as with oil (59 mg, 87%). <sup>1</sup>H NMR (400 MHz, CDCl<sub>3</sub>): δ = 0.83 (t, *J* = 7.4 Hz, 3H), 1.22 (m, 2H), 1.77 (m, 2H), 2.41 (s, 3H), 3.44 (s, 1H), 4.30 (t, *J* = 7.2 Hz, 2H), 5.90 (s, 1H), 7.19 (m, 1H), 7.24–7.32 (m, 4H), 8.88 (d, *J* =

2.1 Hz, 1H) ppm, 8.34 (d, *J* = 2.1 Hz, 1H) ppm. <sup>13</sup>C{<sup>1</sup>H} NMR (100 MHz, CDCl<sub>3</sub>): δ = 12.5 (CH<sub>3</sub>), 13.8 (CH<sub>3</sub>), 20.1 (CH<sub>2</sub>), 32.0 (CH<sub>2</sub>), 46.8 (CH<sub>2</sub>), 74.4 (CH-OH), 114.8 (C), 126.5 (CH), 127.3 (CH), 127.9 (CH), 128.8 (CH), 131.9 (C), 140.6 (C), 143.7 (C), 148.4 (CH), 150.3 (C) ppm. HRMS (ESI) *m/z*: [M + H]<sup>+</sup> calcd. for C<sub>18</sub>H<sub>22</sub>N<sub>3</sub>O<sup>+</sup> 296.1757; found 296.1765.

(1-Butyl-3-methyl-1H-pyrazolo[3,4-b]pyridin-5-yl)(4-chlorophenyl)methanol (**4b**). By the general

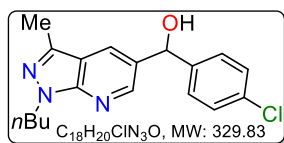

procedure from **3d** (82 mg, 0.25 mmol) and NaBH<sub>4</sub> (18 mg, 0.5 mmol), **4g** was obtained as a white oil (59 mg, 80%). <sup>1</sup>H NMR (400 MHz, CDCl<sub>3</sub>): δ = 0.90 (t, *J* = 7.4 Hz, 3H), 1.31 (m, 2H), 1.85 (m, 2H), 2.49 (s, 3H), 3.18 (s, 1H), 4.40 (t, *J* = 7.3 Hz, 2H), 5.97 (s, 1H), 7.33 (m, 4H), 7.91 (s, 1H), 8.42

(s, 1H) ppm. <sup>13</sup>C{<sup>1</sup>H} NMR (100 MHz, CDCl<sub>3</sub>): δ = 12.5 (CH<sub>3</sub>), 13.8 (CH<sub>3</sub>), 20.1 (CH<sub>2</sub>), 32.1 (CH<sub>2</sub>), 46.8 (CH<sub>2</sub>), 73.8 (CH-OH), 114.8 (C), 127.4 (CH), 127.9 (CH), 128.9 (CH), 131.4 (C), 133.7 (C), 140.6 (C), 142.1 (C), 148.3 (CH), 150.5 (C) ppm. HRMS (ESI) *m/z*: [M + H]<sup>+</sup> calcd. for C<sub>18</sub>H<sub>21</sub><sup>35</sup>ClN<sub>3</sub>O<sup>+</sup> 330.1368; found 330.1368.

## 4. HRMS analysis

### User Chromatograms

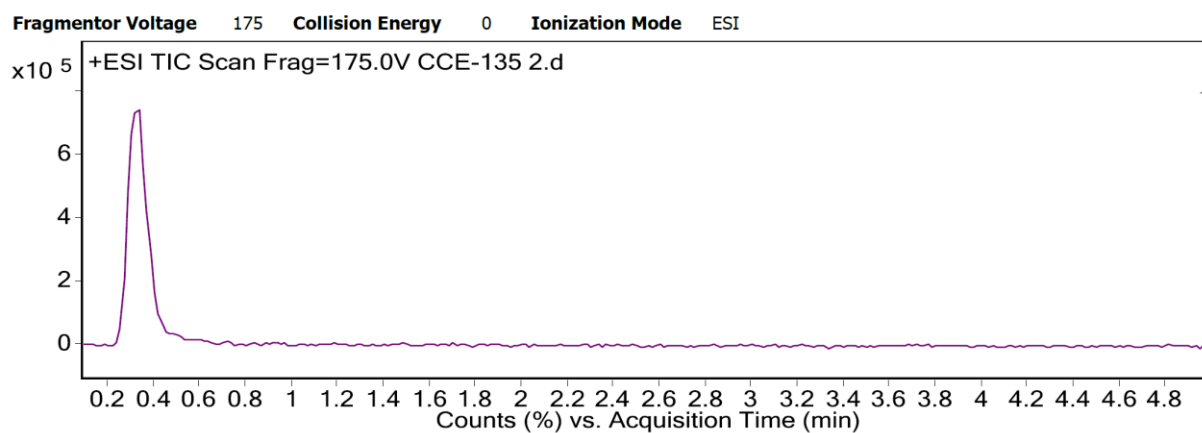

### User Spectra

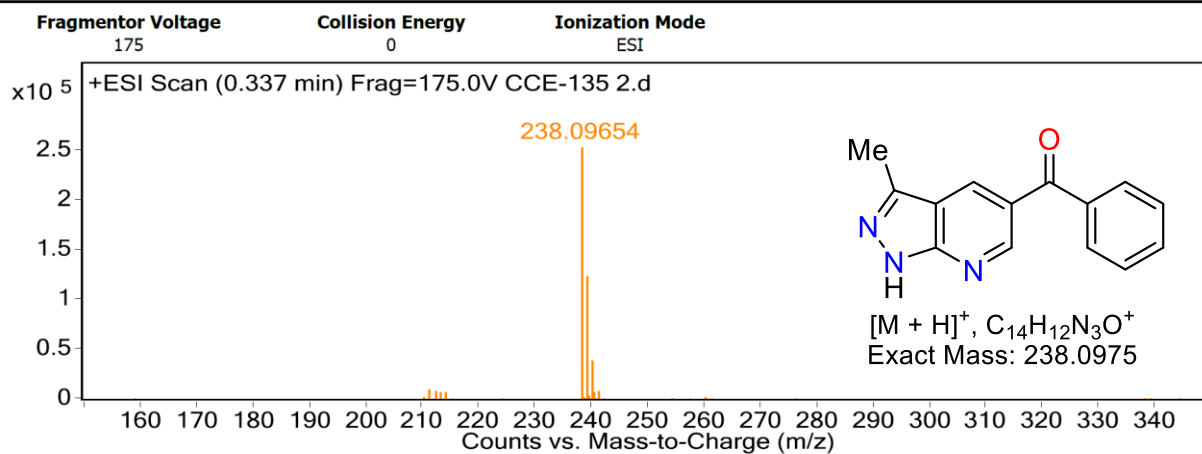

#### Peak List

| m/z       | z | Abund    | Abund % |
|-----------|---|----------|---------|
| 238.09654 |   | 252600.8 | 100     |
| 238.13568 |   | 36321.8  | 14.38   |
| 239.1017  | 1 | 123711.5 | 48.98   |
| 240.10758 | 1 | 38727.1  | 15.33   |

Fig. S2 HRMS analysis of (3-methyl-1H-pyrazolo[3,4-b]pyridin-5-yl)(phenyl)methanone (**2a**)

## User Chromatograms

Fragmentor Voltage 175 Collision Energy 0 Ionization Mode ESI

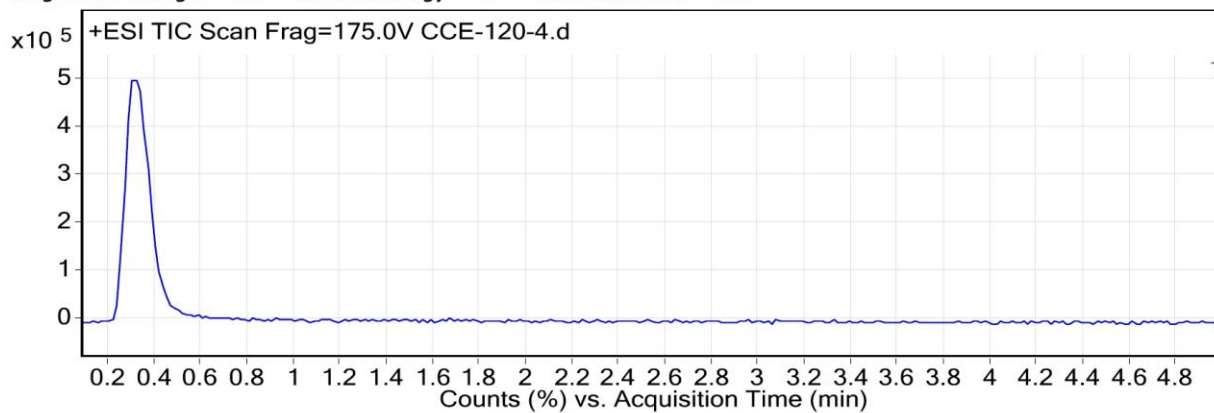

## User Spectra

Fragmentor Voltage 175 Collision Energy 0 Ionization Mode ESI

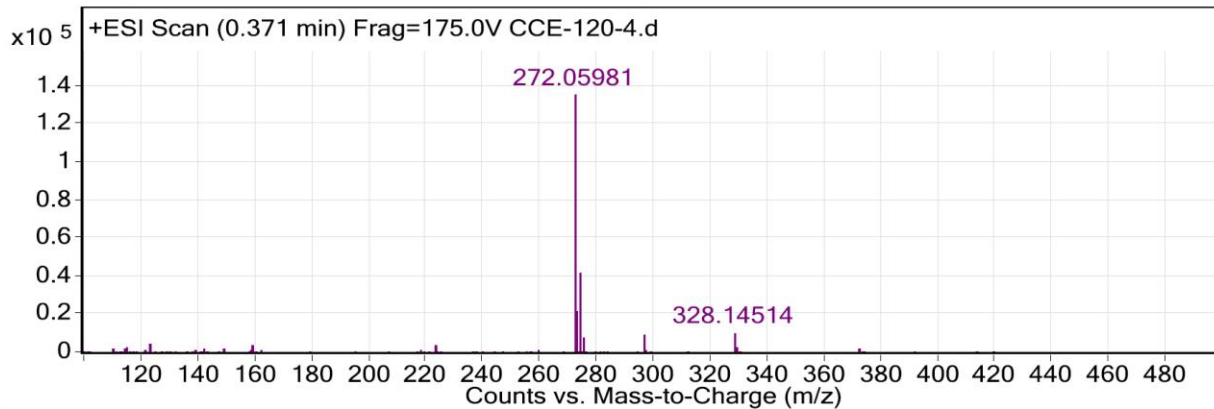

### Peak List

| m/z       | z | Abund   | HeightPercent |
|-----------|---|---------|---------------|
| 81.93703  |   | 7785.2  | 5.73          |
| 272.05981 | 1 | 135961  | 100           |
| 273.06076 | 1 | 21763.7 | 16.01         |
| 274.05729 | 1 | 42314.1 | 31.12         |
| 275.05924 | 1 | 8118.7  | 5.97          |
| 296.17686 |   | 9455.3  | 6.95          |
| 328.14514 |   | 10893.7 | 8.01          |

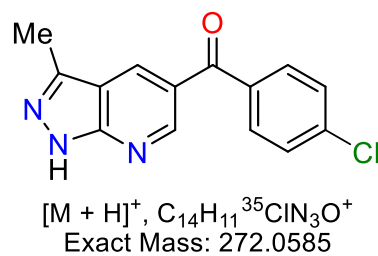

Fig. S3 HRMS analysis of (4-chlorophenyl)(3-methyl-1H-pyrazolo[3,4-b]pyridin-5-yl)methanone (2b)

## User Chromatograms

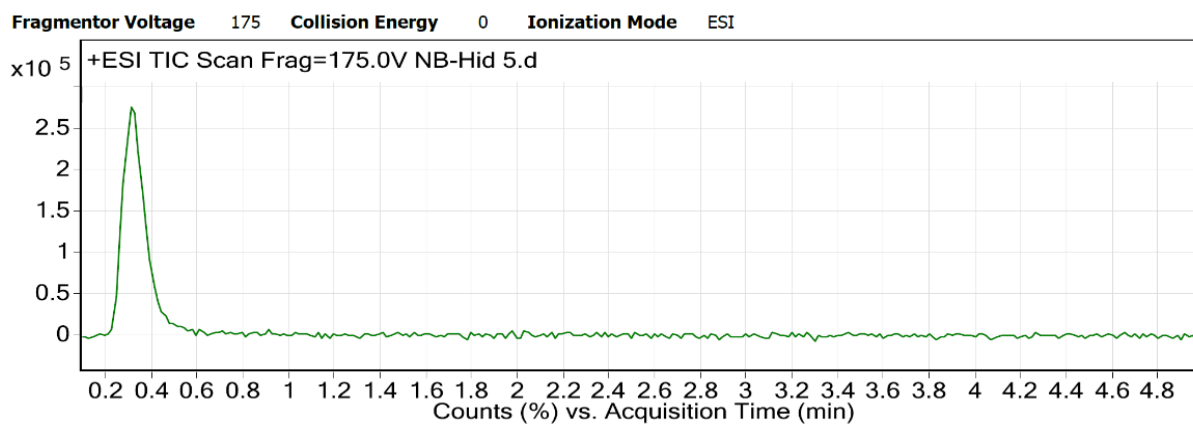

## User Spectra

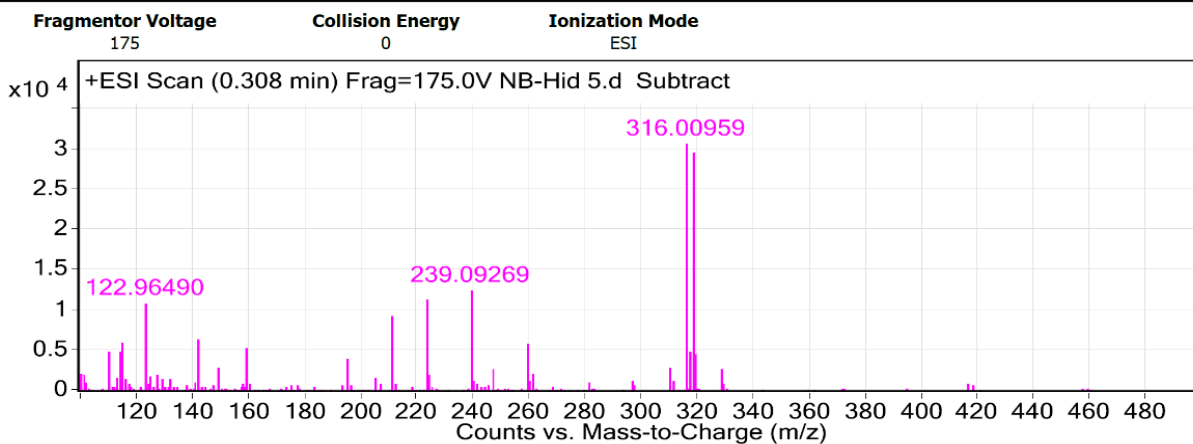

### Peak List

| <i>m/z</i> | <i>z</i> | Abund   | HeightPercent |
|------------|----------|---------|---------------|
| 195.0823   |          | 4012.3  | 13.08         |
| 211.09774  |          | 9284.1  | 30.26         |
| 223.07509  | 1        | 11369.6 | 37.06         |
| 239.09269  |          | 12457.6 | 40.61         |
| 259.05347  |          | 5963.9  | 19.44         |
| 316.00959  | 1        | 30679.6 | 100           |
| 317.01155  | 1        | 4893.2  | 15.95         |
| 318.00613  | 1        | 29496.1 | 96.14         |
| 319.01014  | 1        | 4542.8  | 14.81         |

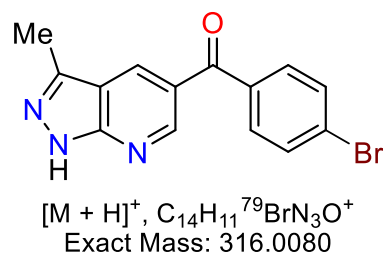

Fig. S4 HRMS analysis of (4-bromophenyl)(3-methyl-1H-pyrazolo[3,4-b]pyridin-5-yl)methanone (2c)

## User Chromatograms

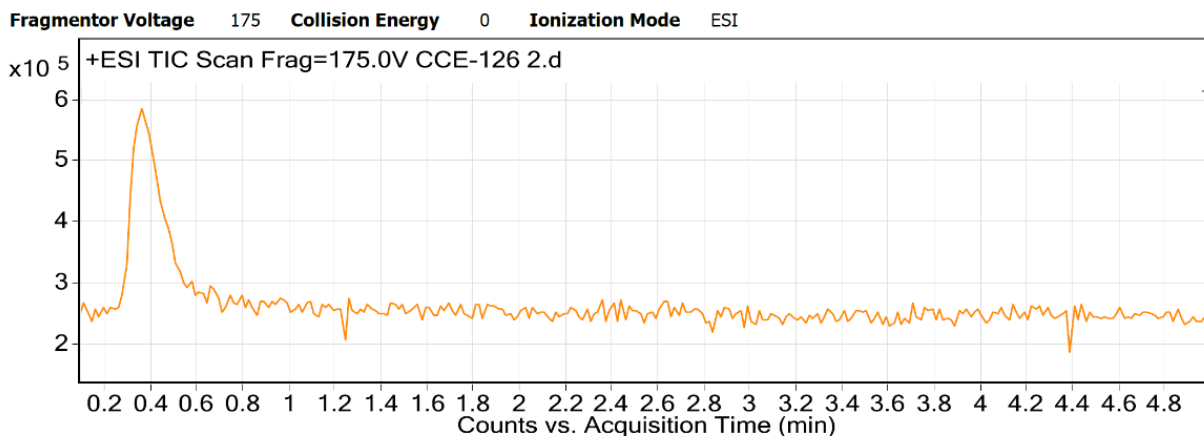

## User Spectra

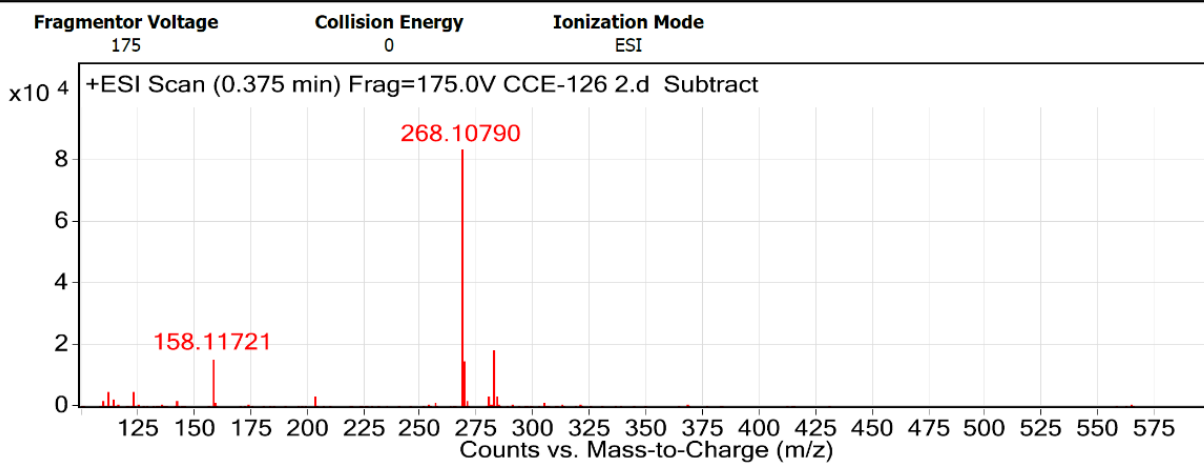

### Peak List

| <i>m/z</i> | <i>z</i> | Abund   | HeightPercent |
|------------|----------|---------|---------------|
| 81.9382    |          | 6841.2  | 8.2           |
| 112.11186  |          | 5086.7  | 6.09          |
| 122.96363  |          | 4893.3  | 5.86          |
| 158.11721  |          | 15725.4 | 18.84         |
| 268.1079   | 1        | 83473.6 | 100           |
| 269.1105   | 1        | 14939   | 17.9          |
| 282.27824  |          | 18688.3 | 22.39         |
| 609.2804   | 1        | 20562.1 | 24.63         |

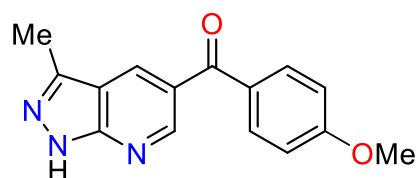

$[M + H]^+$ ,  $C_{15}H_{14}N_3O_2^+$   
Exact Mass: 268.1081

Fig. S5 HRMS analysis of (4-methoxyphenyl)(3-methyl-1*H*-pyrazolo[3,4-*b*]pyridin-5-yl)methanone (**2d**)

## User Chromatograms

Fragmentor Voltage 175 Collision Energy 0 Ionization Mode ESI

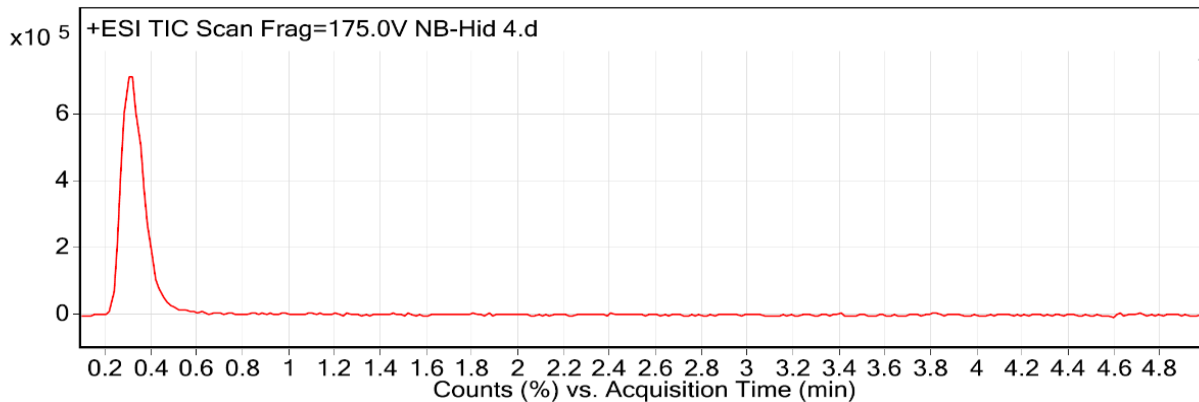

## User Spectra

Fragmentor Voltage 175 Collision Energy 0 Ionization Mode ESI

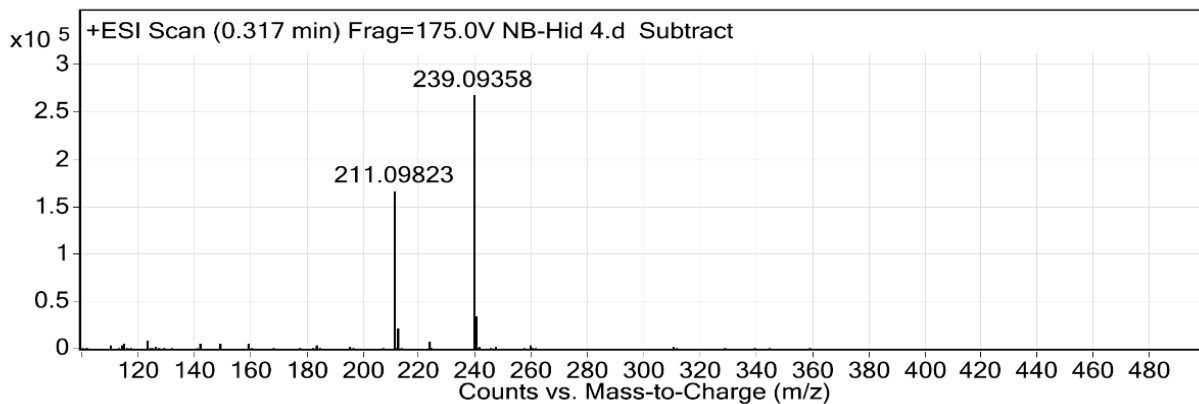

### Peak List

| <i>m/z</i> | <i>z</i> | Abund    | HeightPercent |
|------------|----------|----------|---------------|
| 81.93688   |          | 16723.4  | 6.22          |
| 211.09823  | 1        | 167462.4 | 62.33         |
| 212.10117  | 1        | 22798.1  | 8.49          |
| 239.09358  | 1        | 268675.7 | 100           |
| 240.09667  | 1        | 35983.7  | 13.39         |

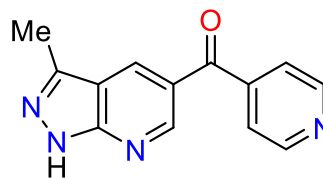

$[M + H]^+$ ,  $C_{13}H_{11}N_4O^+$   
Exact Mass: 239.0927

Fig. S6 HRMS analysis of (3-methyl-1*H*-pyrazolo[3,4-*b*]pyridin-5-yl)(pyridin-4-yl)methanone (**2e**)

## User Chromatograms

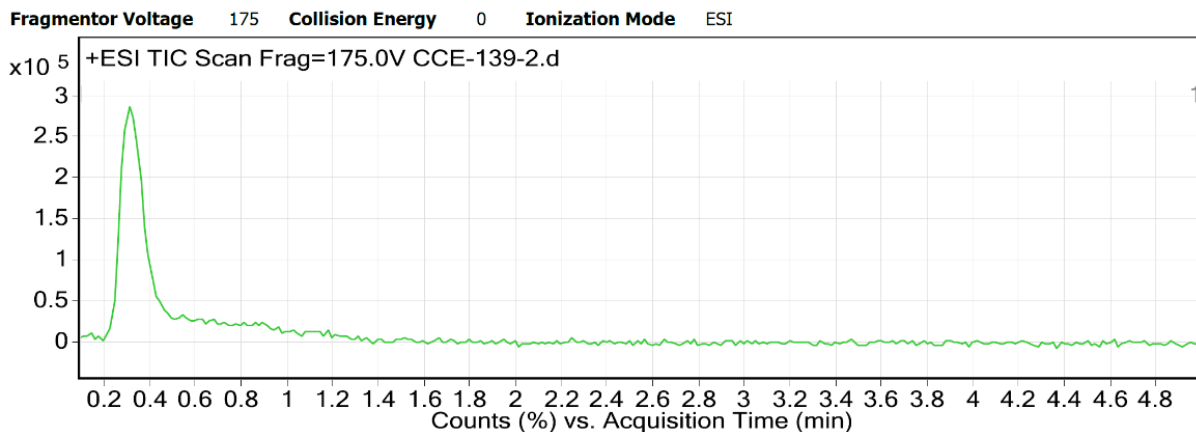

## User Spectra

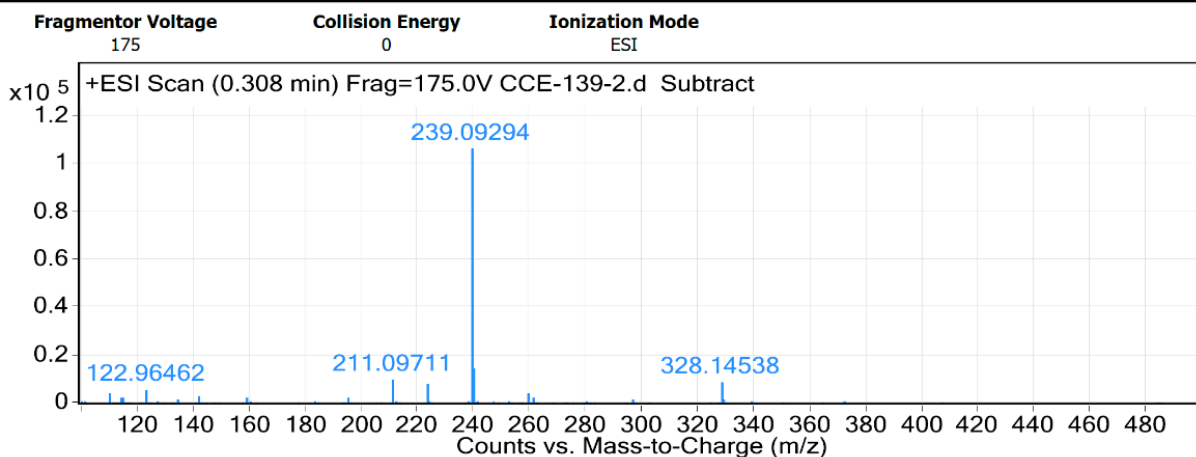

### Peak List

| m/z       | z | Abund   | HeightPercent |
|-----------|---|---------|---------------|
| 81.93675  |   | 9578.3  | 8.98          |
| 122.96462 |   | 5823.6  | 5.46          |
| 211.09711 |   | 9940    | 9.32          |
| 223.07488 |   | 8268.9  | 7.75          |
| 239.09294 | 1 | 106676  | 100           |
| 240.09581 | 1 | 14715.1 | 13.79         |
| 328.14538 |   | 8916.1  | 8.36          |

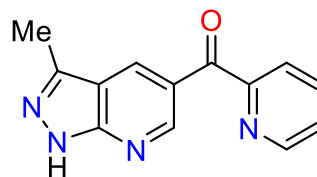

$[M + H]^+$ ,  $C_{13}H_{11}N_4O^+$   
Exact Mass: 239.0927

Fig. S7 HRMS analysis of (3-methyl-1*H*-pyrazolo[3,4-*b*]pyridin-5-yl)(pyridin-2-yl)methanone (**2f**)



## User Chromatograms

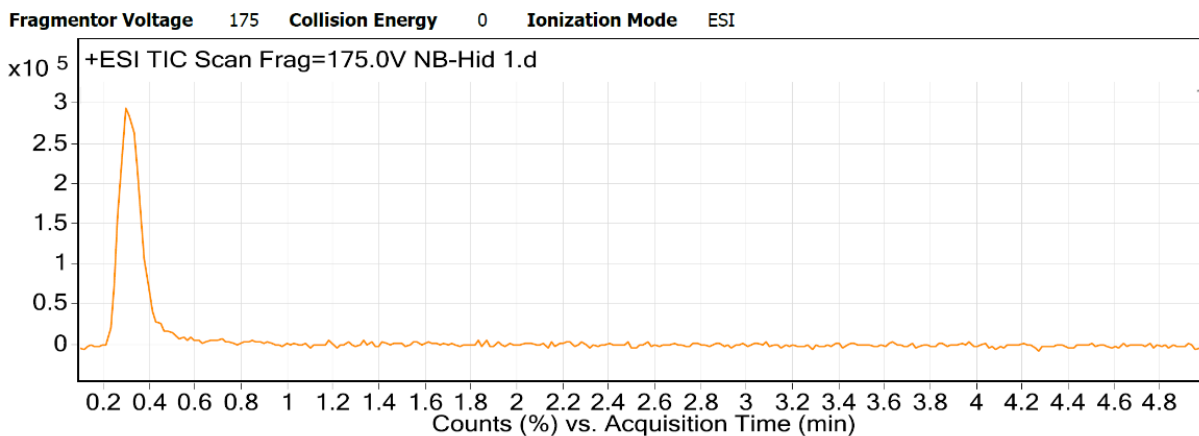

## User Spectra

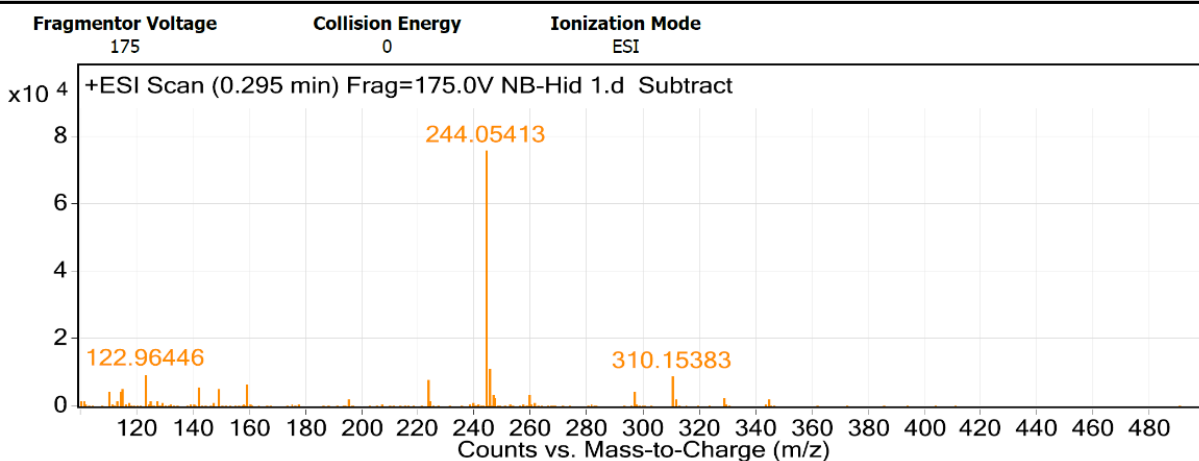

### Peak List

| <i>m/z</i> | <i>z</i> | Abund   | HeightPercent |
|------------|----------|---------|---------------|
| 141.95907  |          | 5954.4  | 7.85          |
| 149.02333  |          | 5299.8  | 6.99          |
| 158.97637  |          | 7020.7  | 9.26          |
| 223.07438  |          | 8164.7  | 10.77         |
| 244.05413  | 1        | 75838.6 | 100           |
| 245.05848  | 1        | 11327   | 14.94         |
| 296.17508  |          | 4524.3  | 5.97          |
| 310.15383  |          | 8902.4  | 11.74         |

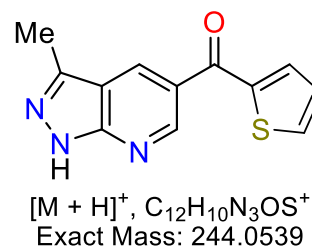

Fig. S8 HRMS analysis of (3-methyl-1*H*-pyrazolo[3,4-*b*]pyridin-5-yl)(thiophen-2-yl)methanone (**2g**)

## User Chromatograms

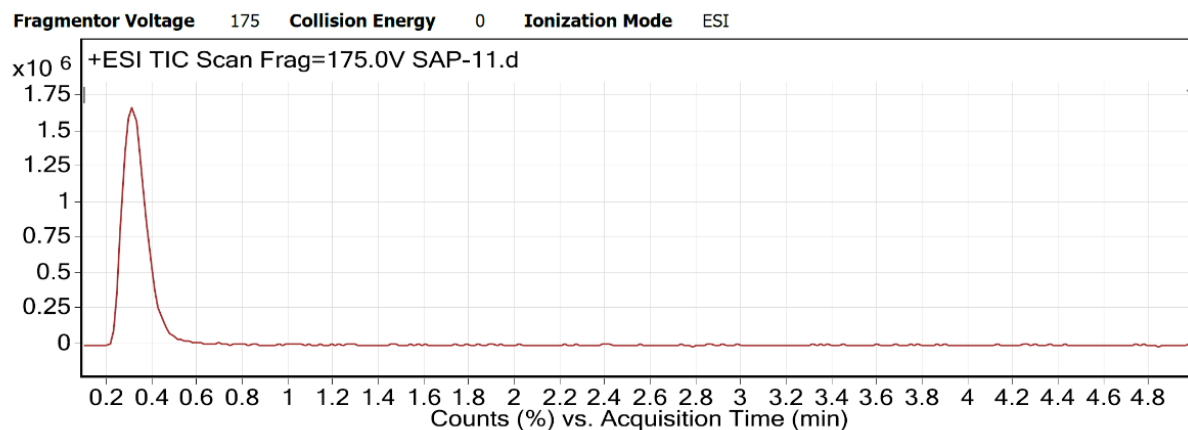

## User Spectra

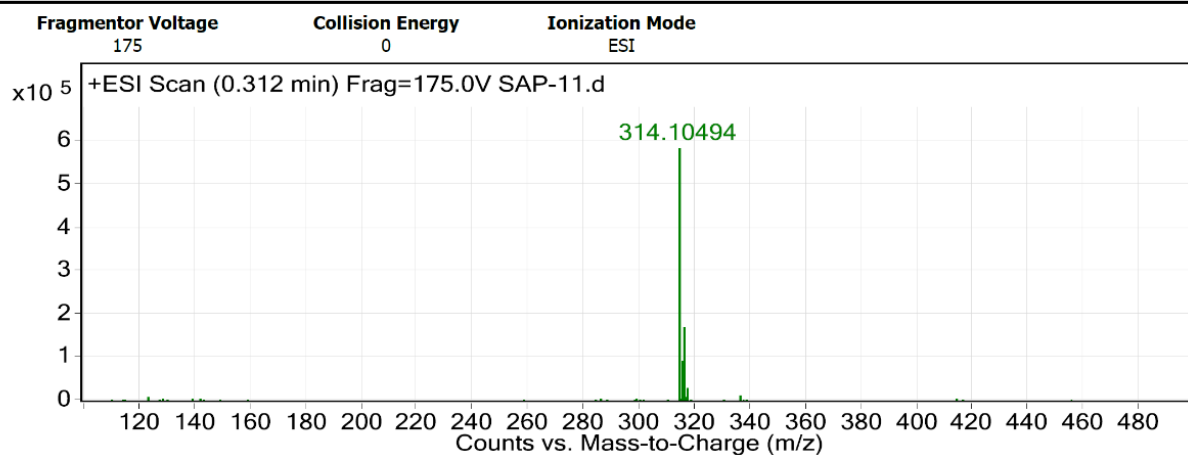

### Peak List

| m/z       | z | Abund    | HeightPercent |
|-----------|---|----------|---------------|
| 314.10494 | 1 | 584712.6 | 100           |
| 314.14786 |   | 68972.9  | 11.8          |
| 315.10839 | 1 | 95871    | 16.4          |
| 316.10341 | 1 | 170714.2 | 29.2          |
| 317.10596 | 1 | 30743.4  | 5.26          |

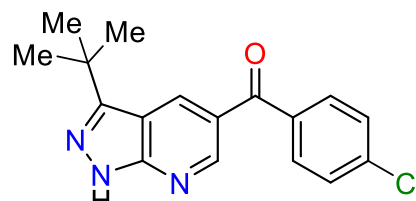

$[M + H]^+$ ,  $C_{17}H_{17}^{35}ClN_3O^+$   
Exact Mass: 314.1055

Fig. S9 HRMS analysis of (3-(*t*-butyl)-1*H*-pyrazolo[3,4-*b*]pyridin-5-yl)(4-chlorophenyl)methanone (**2h**)

## User Chromatograms

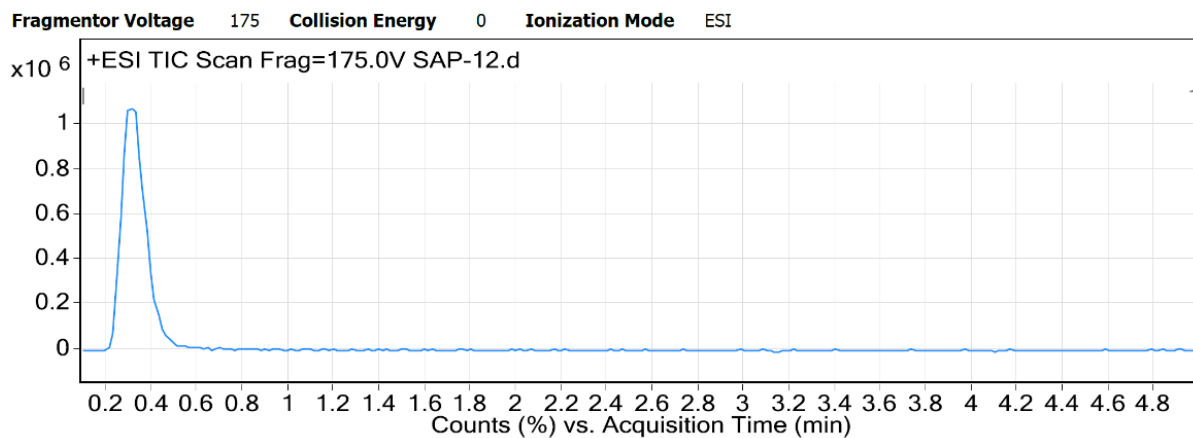

## User Spectra

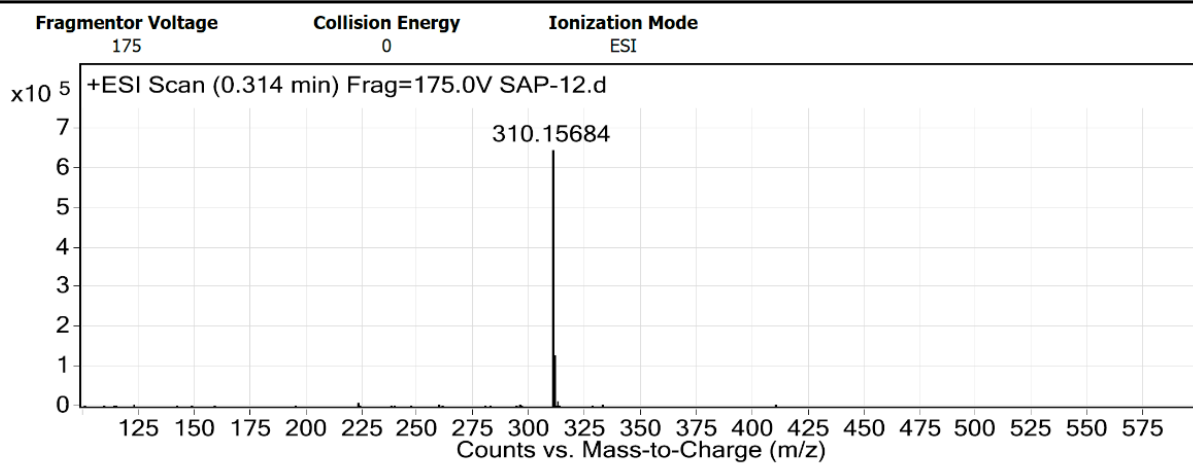

### Peak List

| m/z       | z | Abund    | HeightPercent |
|-----------|---|----------|---------------|
| 310.15684 | 1 | 646219.4 | 100           |
| 311.15974 | 1 | 131675.3 | 20.38         |

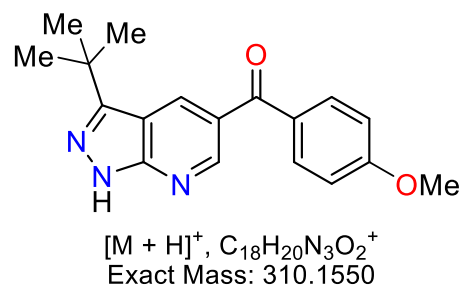

Fig. S10 HRMS analysis of (3-(*t*-butyl)-1*H*-pyrazolo[3,4-*b*]pyridin-5-yl)(4-methoxyphenyl)methanone (**2i**)

## User Chromatograms

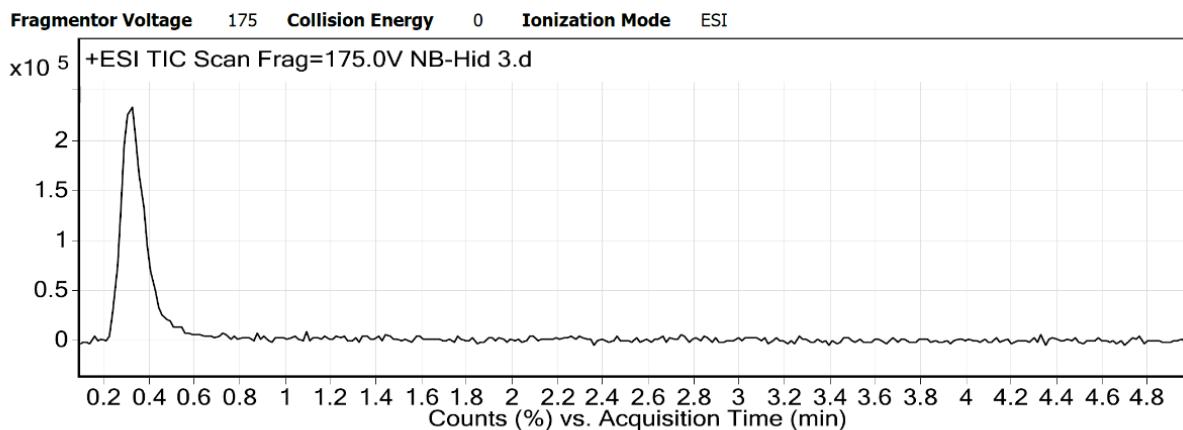

## User Spectra

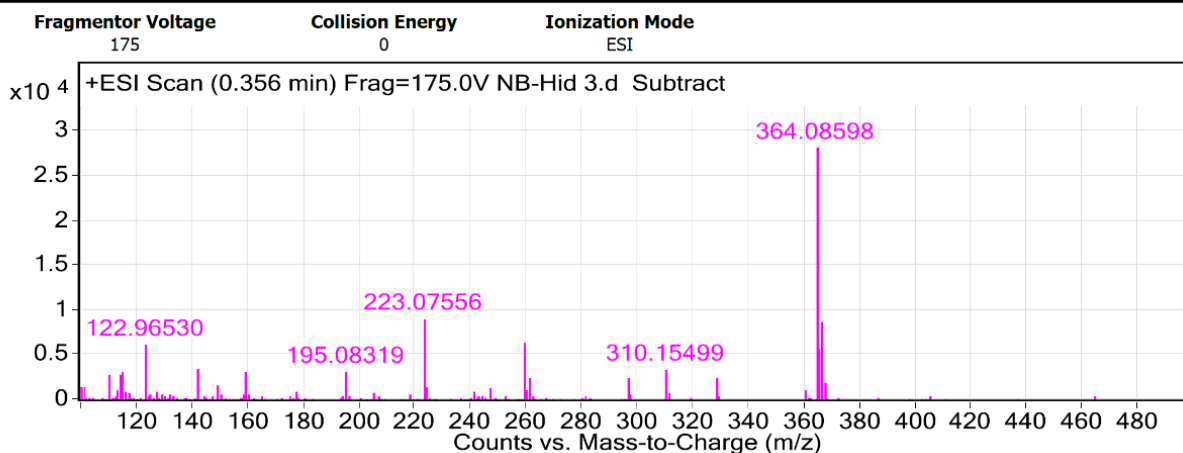

### Peak List

| m/z       | z | Abund   | HeightPercent |
|-----------|---|---------|---------------|
| 195.08319 |   | 3203.3  | 11.35         |
| 223.07556 | 1 | 9149.2  | 32.41         |
| 259.05351 |   | 6383.6  | 22.61         |
| 261.05024 |   | 2594.3  | 9.19          |
| 296.17747 |   | 2562    | 9.07          |
| 310.15499 |   | 3451.4  | 12.23         |
| 328.14684 |   | 2484    | 8.8           |
| 364.08598 | 1 | 28231.9 | 100           |
| 365.08884 | 1 | 5703.9  | 20.2          |
| 366.08342 | 1 | 8835.2  | 31.29         |

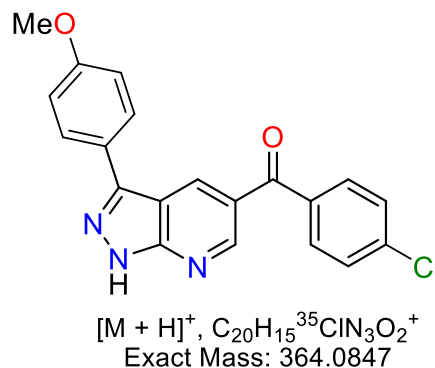

Fig. S11 HRMS analysis of (4-chlorophenyl)(3-(4-methoxyphenyl)-1H-pyrazolo[3,4-b]pyridin-5-yl)methanone (**2j**)

## User Chromatograms

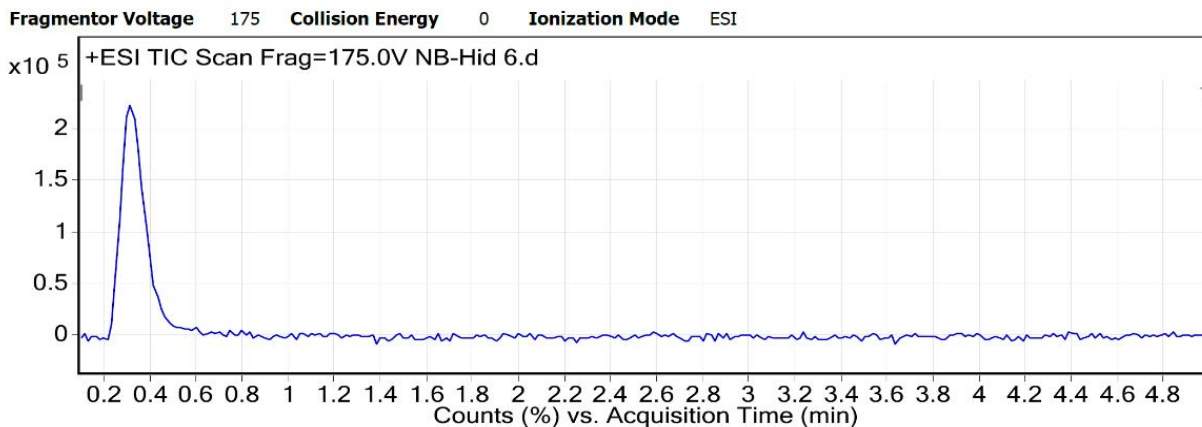

## User Spectra

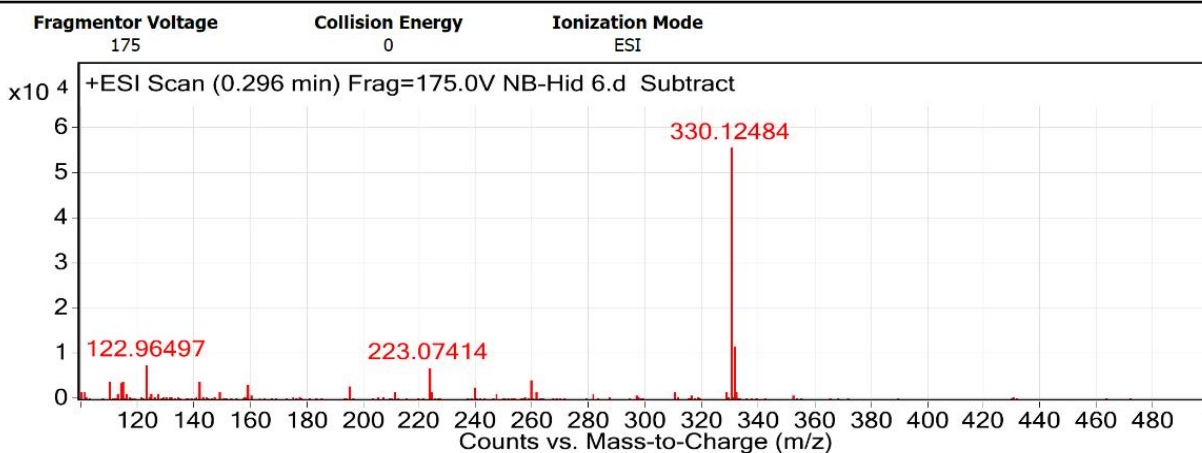

### Peak List

| <i>m/z</i> | <i>z</i> | Abund   | HeightPercent |
|------------|----------|---------|---------------|
| 122.96497  |          | 7614.2  | 13.68         |
| 141.95936  |          | 4045.5  | 7.27          |
| 158.97393  |          | 3451    | 6.2           |
| 195.08218  |          | 3001    | 5.39          |
| 223.07414  |          | 6981.2  | 12.55         |
| 259.05236  |          | 4211.2  | 7.57          |
| 330.12484  | 1        | 55647.7 | 100           |
| 331.12801  | 1        | 11554.7 | 20.76         |

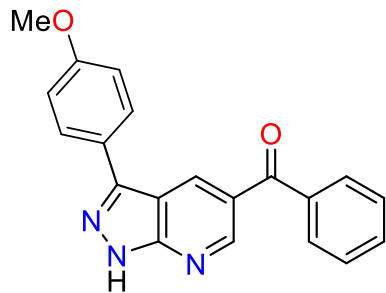

$[M + H]^+$ ,  $C_{20}H_{16}N_3O_2^+$   
Exact Mass: 330.1237

Fig. S12 HRMS analysis of (3-(4-methoxyphenyl)-1*H*-pyrazolo[3,4-*b*]pyridin-5-yl)(phenyl)methanone (**2k**)

## User Chromatograms

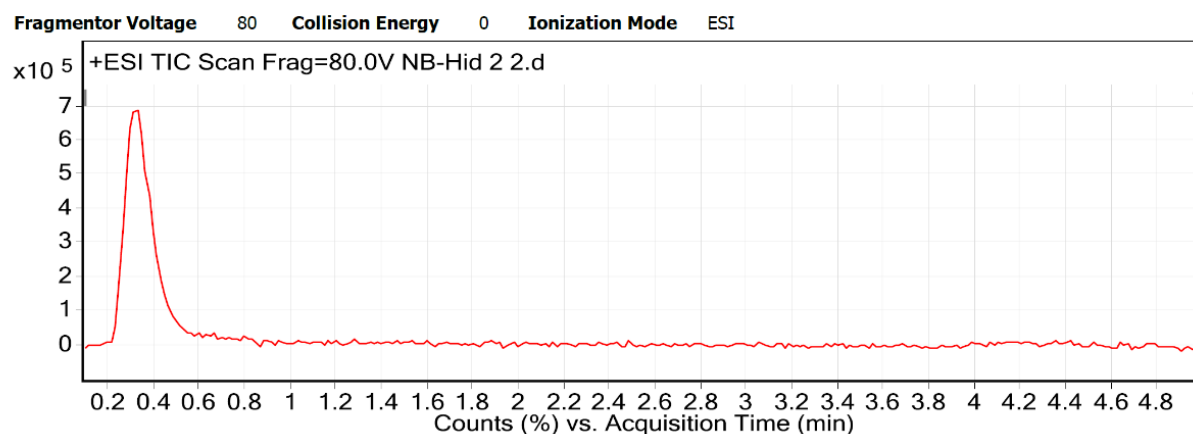

## User Spectra

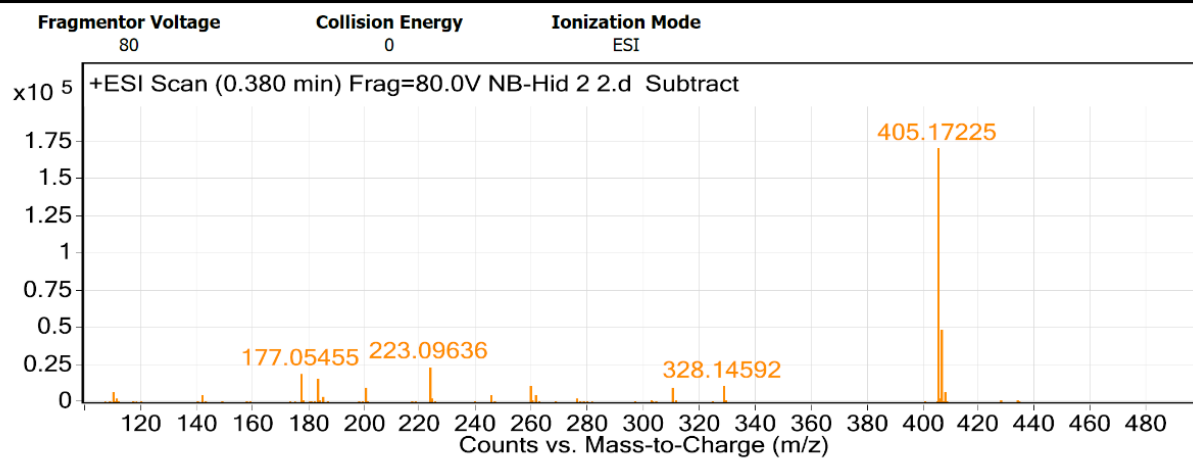

### Peak List

| m/z       | z | Abund    | HeightPercent |
|-----------|---|----------|---------------|
| 177.05455 |   | 19149.2  | 11.22         |
| 182.9852  |   | 16567.3  | 9.71          |
| 200.00094 |   | 10308    | 6.04          |
| 223.09636 |   | 23822.6  | 13.96         |
| 259.05422 |   | 11646.9  | 6.82          |
| 310.1554  |   | 10119.4  | 5.93          |
| 328.14592 |   | 10850.1  | 6.36          |
| 405.17225 | 1 | 170687.3 | 100           |

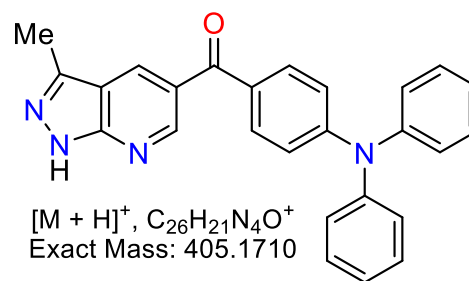

Fig. S13 HRMS analysis of (4-(diphenylamino)phenyl)(3-methyl-1H-pyrazolo[3,4-b]pyridin-5-yl)methanone (**21**)

## User Chromatograms

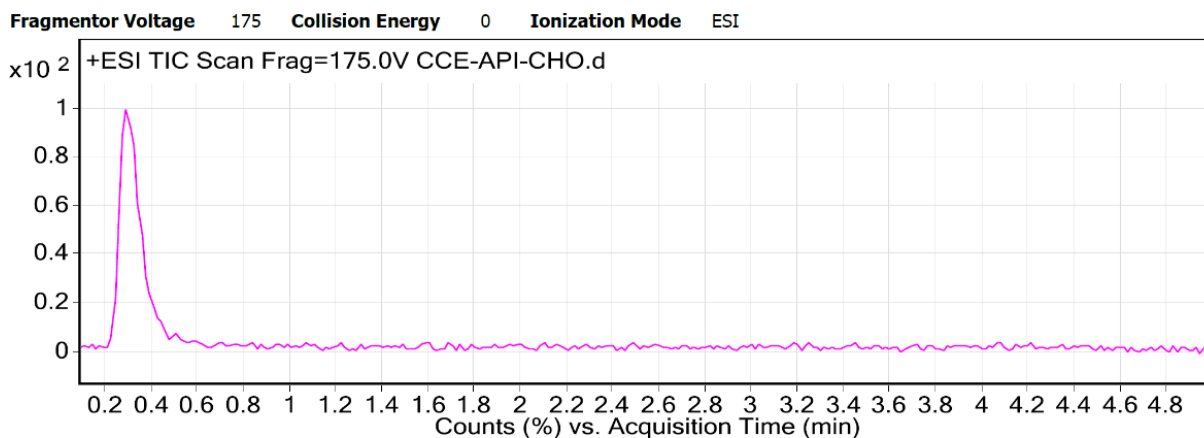

## User Spectra

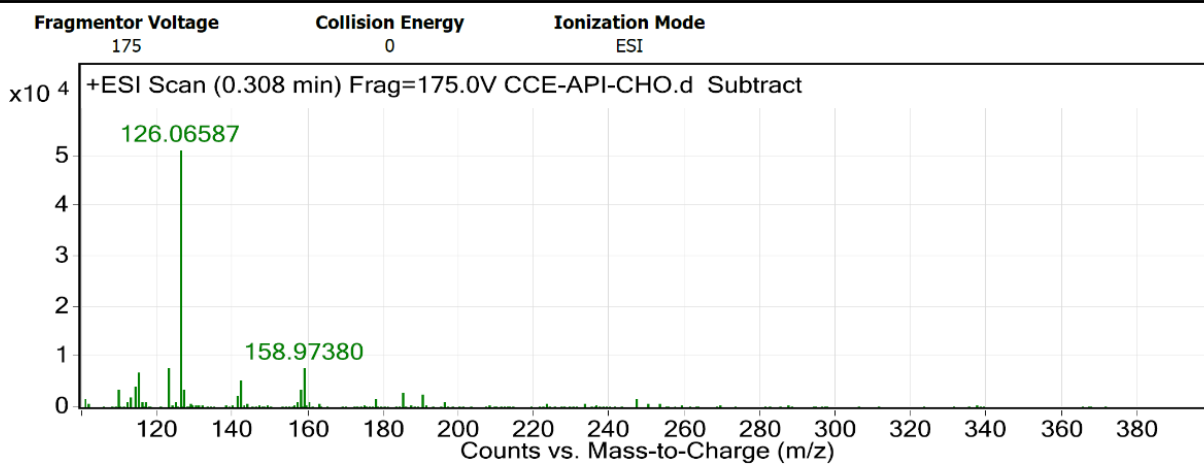

### Peak List

| <i>m/z</i> | <i>z</i> | Abund   | HeightPercent |
|------------|----------|---------|---------------|
| 109.94353  |          | 3705.2  | 7.24          |
| 113.96342  |          | 4327.2  | 8.45          |
| 114.98395  |          | 6985.5  | 13.65         |
| 122.96312  |          | 7932.1  | 15.5          |
| 126.06587  | 1        | 51190.1 | 100           |
| 127.06941  | 1        | 3726.3  | 7.28          |
| 141.95864  |          | 5523    | 10.79         |
| 158.11692  |          | 3584.1  | 7             |

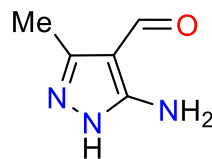

$[M + H]^+$ ,  $C_5H_8N_3O^+$   
Exact Mass: 126.0662

Fig. S14 HRMS analysis of 5-amino-3-methyl-1*H*-pyrazole-4-carbaldehyde (**2b''**)

## User Chromatograms

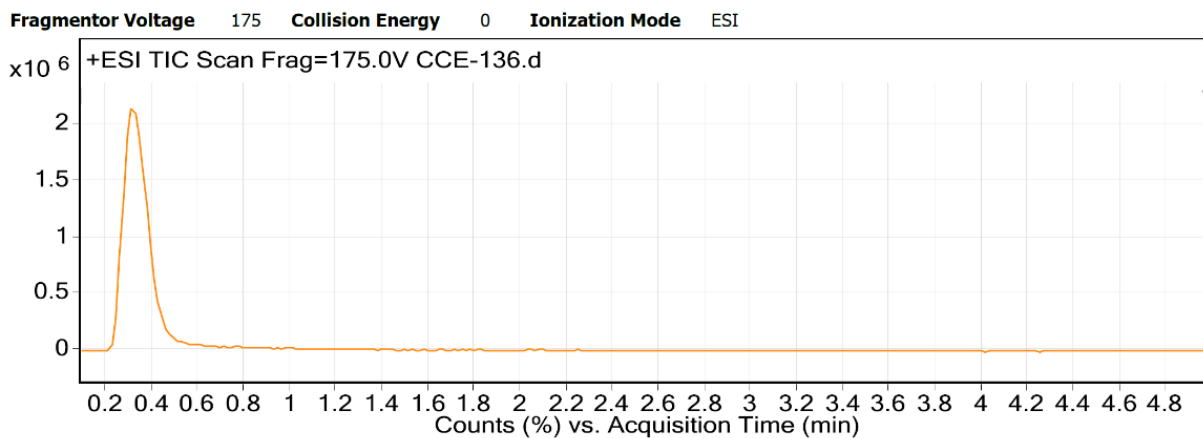

## User Spectra

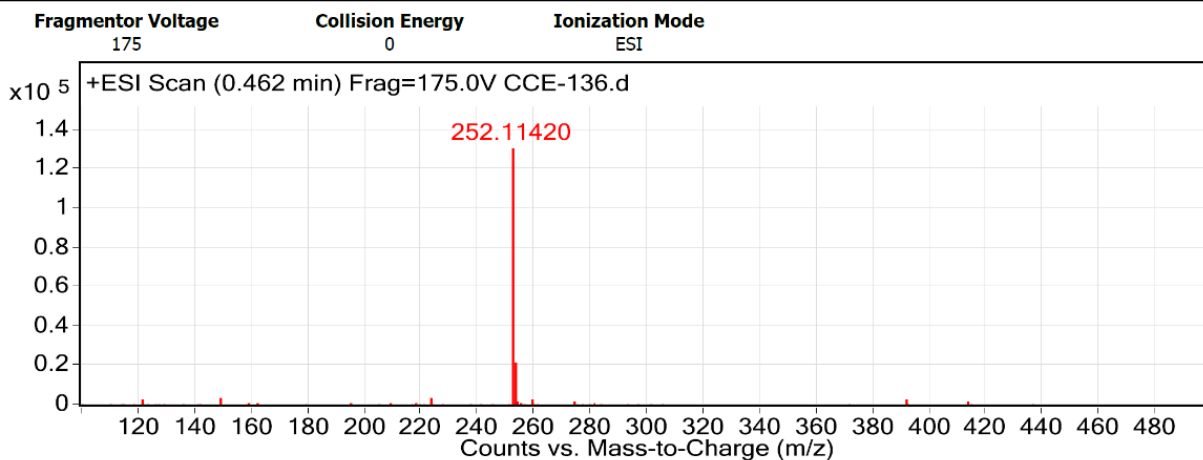

### Peak List

| <i>m/z</i> | <i>z</i> | Abund    | HeightPercent |
|------------|----------|----------|---------------|
| 252.1142   | 1        | 130702.5 | 100           |
| 253.11581  | 1        | 21813.3  | 16.69         |

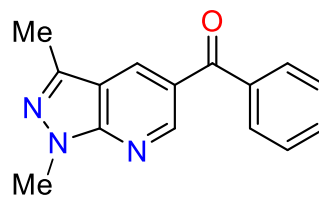

[M + H]<sup>+</sup>, C<sub>15</sub>H<sub>14</sub>N<sub>3</sub>O<sup>+</sup>  
Exact Mass: 252.1131

Fig. S15 HRMS analysis of (1,3-dimethyl-1*H*-pyrazolo[3,4-*b*]pyridin-5-yl)(phenyl)methanone (**3a**)



## User Chromatograms

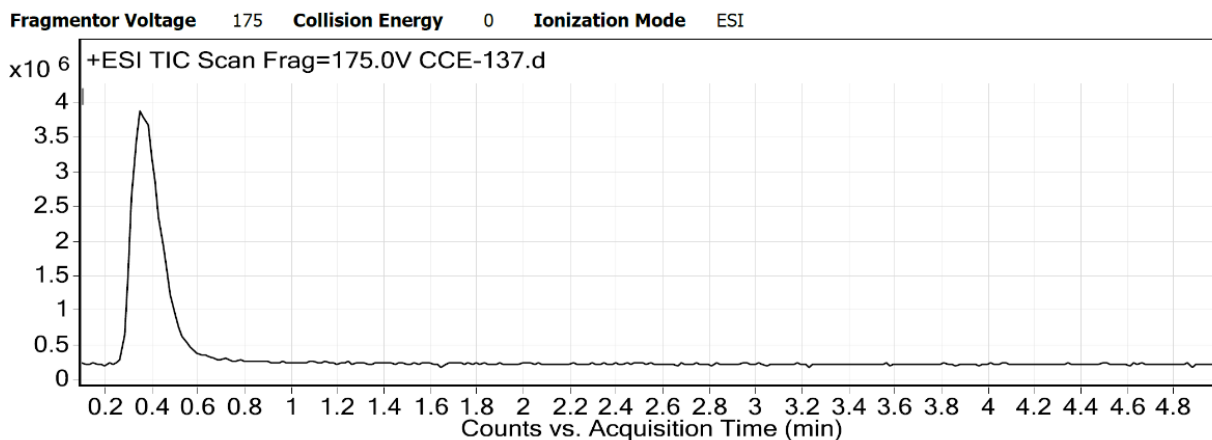

## User Spectra

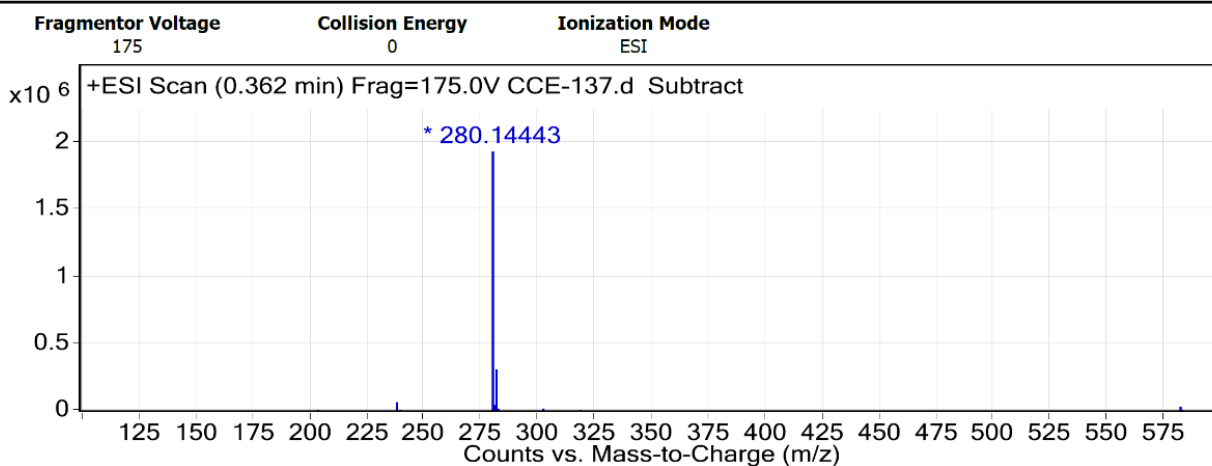

### Peak List

| <i>m/z</i> | <i>z</i> | Abund     | HeightPercent |
|------------|----------|-----------|---------------|
| 280.14443  | 1        | 1936032.1 | 100           |
| 280.18669  |          | 129166.5  | 6.67          |
| 281.14704  | 1        | 308474.5  | 15.93         |

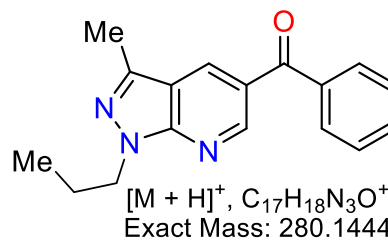

Fig. S16 HRMS analysis of (3-methyl-1-propyl-1H-pyrazolo[3,4-*b*]pyridin-5-yl)(phenyl)methanone (**3b**)

## User Chromatograms

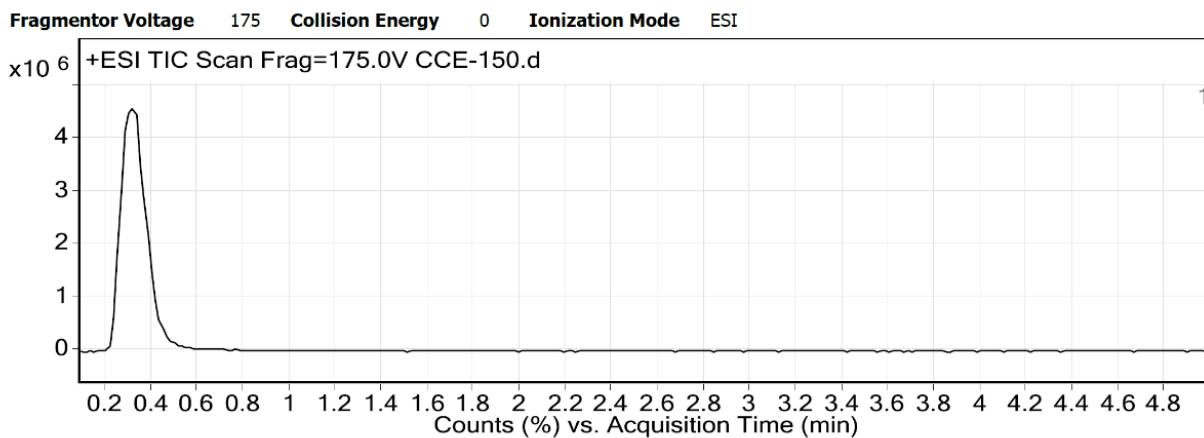

## User Spectra

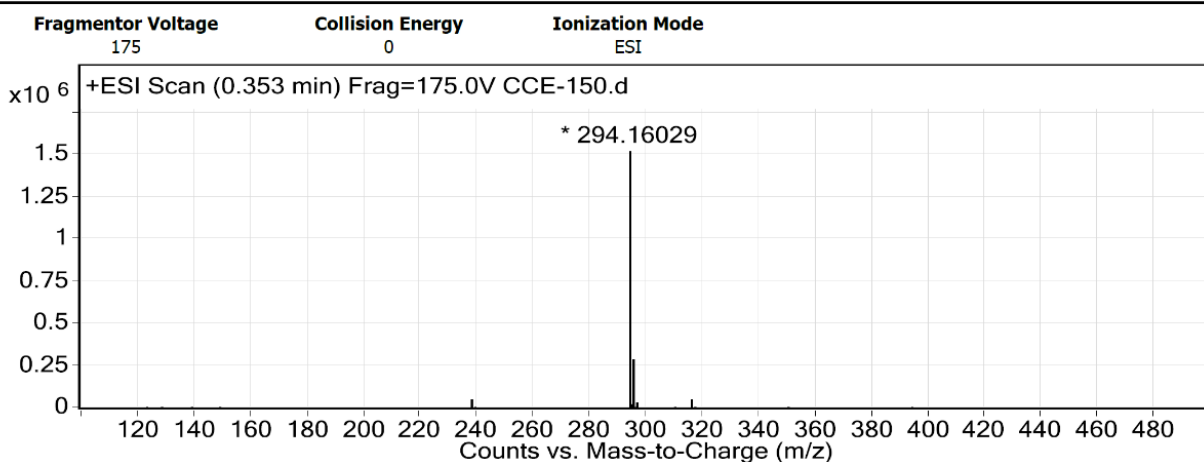

### Peak List

| <i>m/z</i> | <i>z</i> | Abund     | HeightPercent |
|------------|----------|-----------|---------------|
| 294.16029  | 1        | 1523380.5 | 100           |
| 294.20222  |          | 111572.1  | 7.32          |
| 294.24146  |          | 80863.7   | 5.31          |
| 295.16294  | 1        | 287785.2  | 18.89         |

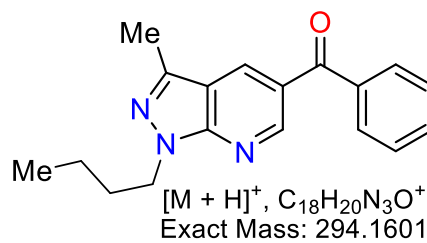

Fig. S17 HRMS analysis of (1-butyl-3-methyl-1H-pyrazolo[3,4-b]pyridin-5-yl)(phenyl)methanone (**3c**)

## User Chromatograms

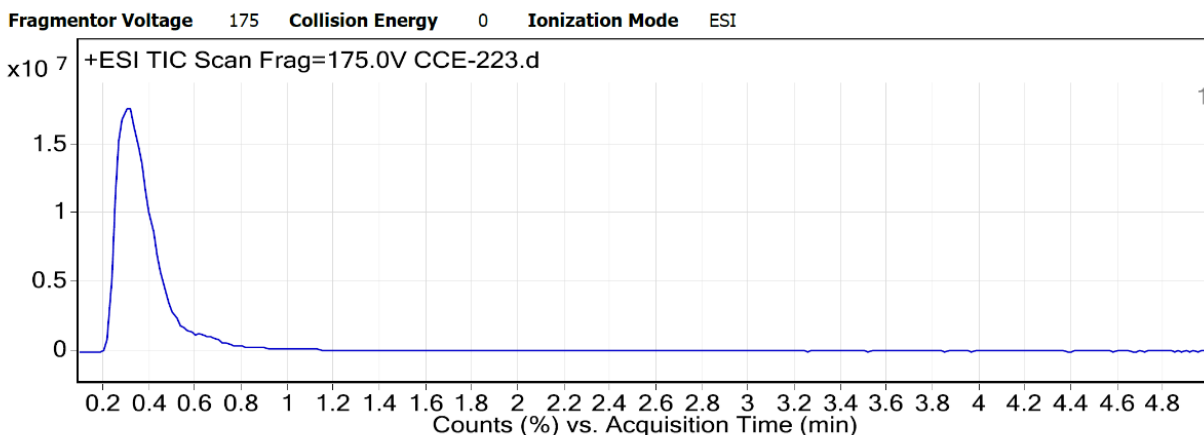

## User Spectra

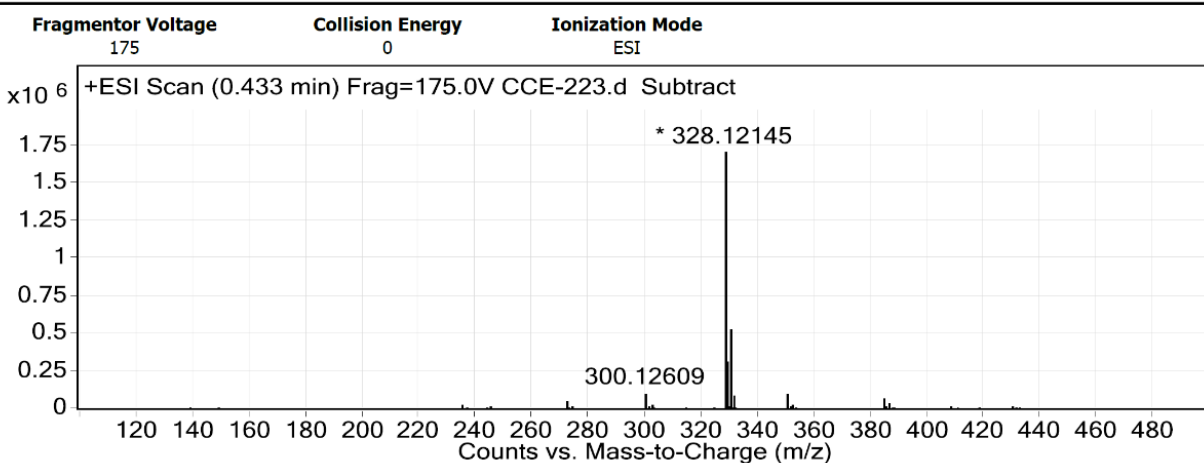

### Peak List

| <i>m/z</i> | <i>z</i> | Abund     | HeightPercent |
|------------|----------|-----------|---------------|
| 300.12609  |          | 104372.1  | 6.11          |
| 328.12145  | 1        | 1707117.5 | 100           |
| 328.16538  |          | 126568.4  | 7.41          |
| 328.20785  |          | 91290.5   | 5.35          |
| 328.27561  |          | 86043.7   | 5.04          |
| 329.1237   | 1        | 312547.9  | 18.31         |
| 330.11871  | 1        | 529508.2  | 31.02         |
| 331.12179  | 1        | 92387.1   | 5.41          |

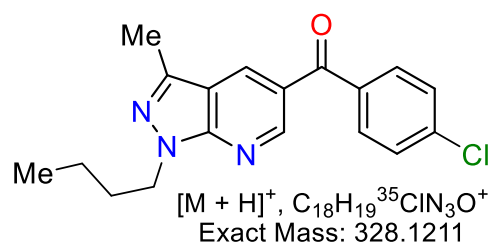

Fig. S18 HRMS analysis of (1-butyl-3-methyl-1H-pyrazolo[3,4-*b*]pyridin-5-yl)(4-chlorophenyl)methanone (**3d**)

## User Chromatograms

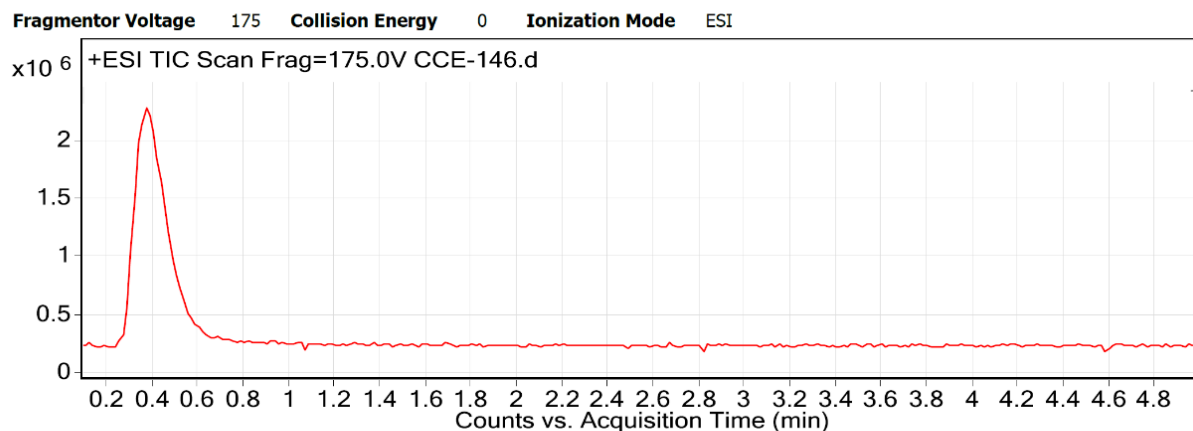

## User Spectra

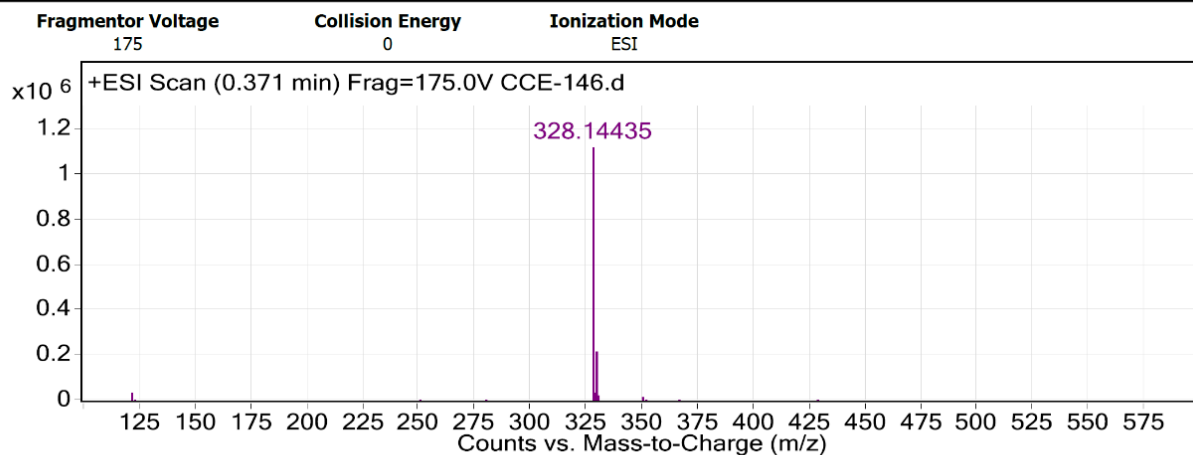

### Peak List

| m/z       | z | Abund   | HeightPercent |
|-----------|---|---------|---------------|
| 328.14435 | 1 | 1120921 | 100           |
| 328.19066 |   | 96727   | 8.63          |
| 329.14746 | 1 | 221351  | 19.75         |
| 922.01134 |   | 68610   | 6.12          |

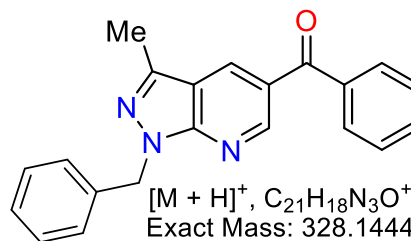

Fig. S19 HRMS analysis of (1-benzyl-3-methyl-1H-pyrazolo[3,4-b]pyridin-5-yl)(phenyl)methanone (3e)

## User Chromatograms

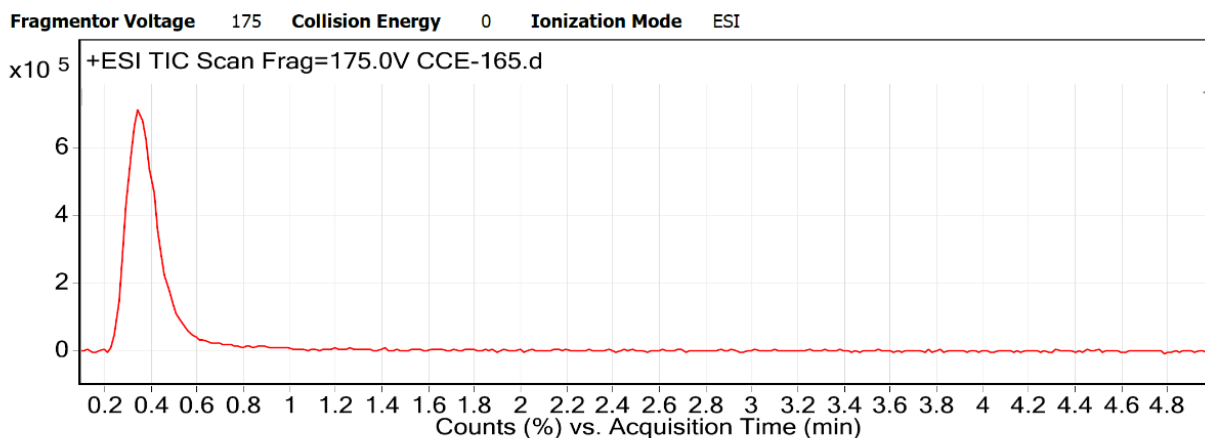

## User Spectra

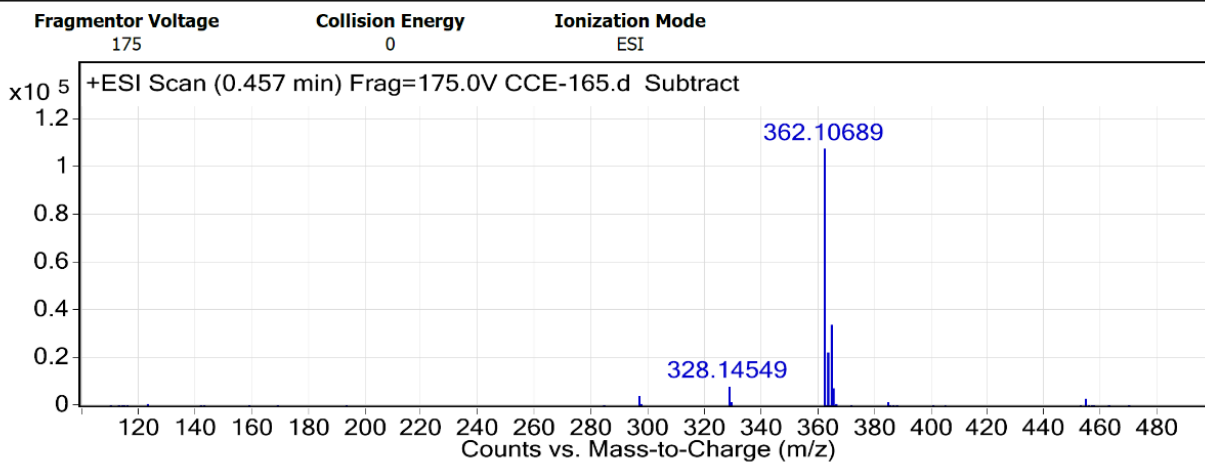

### Peak List

| <i>m/z</i> | <i>z</i> | Abund    | HeightPercent |
|------------|----------|----------|---------------|
| 328.14549  |          | 8225.6   | 7.62          |
| 362.10689  | 1        | 107960.2 | 100           |
| 363.10913  | 1        | 22551.2  | 20.89         |
| 364.10491  | 1        | 34471.4  | 31.93         |
| 365.10465  | 1        | 7856.2   | 7.28          |

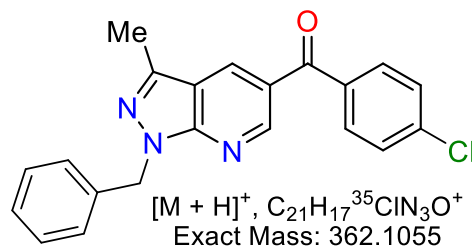

Fig. S20 HRMS analysis of (1-benzyl-3-methyl-1*H*-pyrazolo[3,4-*b*]pyridin-5-yl)(4-chlorophenyl)methanone (**3f**)

## User Chromatograms

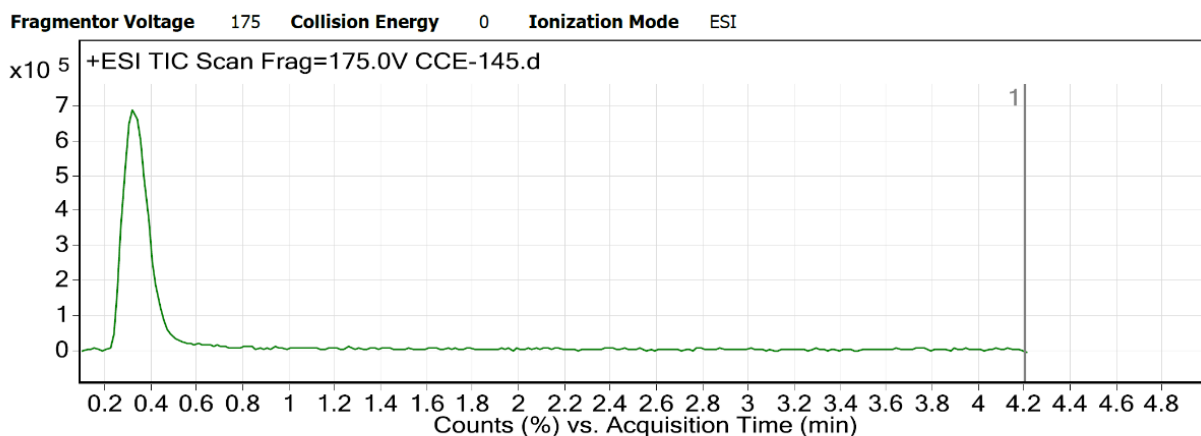

## User Spectra

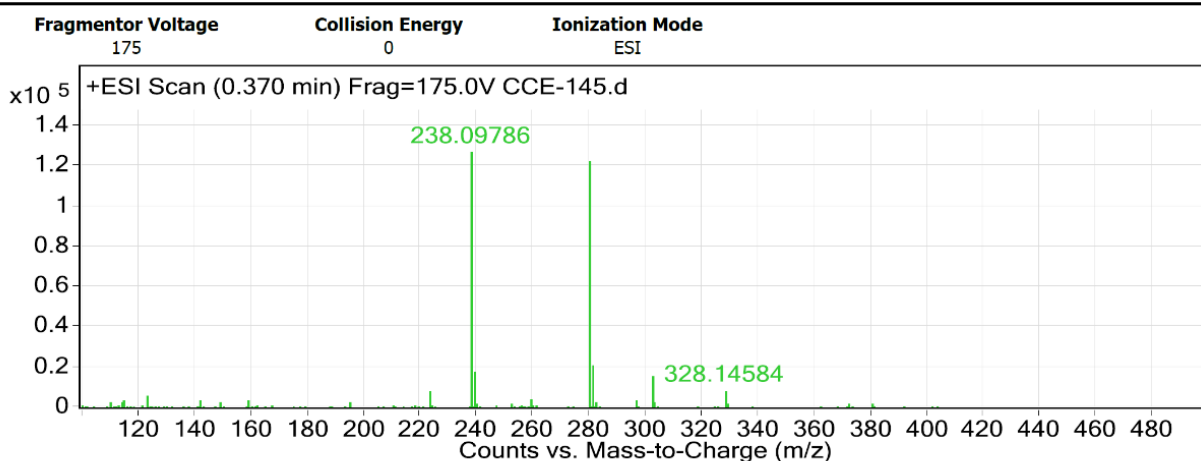

### Peak List

| <i>m/z</i>      | <i>z</i> | Abund           | HeightPercent |
|-----------------|----------|-----------------|---------------|
| 81.93642        |          | 9879.3          | 7.76          |
| 223.07422       |          | 8278.6          | 6.5           |
| 238.09786       | 1        | 127356.9        | 100           |
| 239.1014        | 1        | 18239.9         | 14.32         |
| <b>280.1081</b> | <b>1</b> | <b>122687.9</b> | <b>96.33</b>  |
| 281.1112        | 1        | 21154.1         | 16.61         |
| 302.08954       |          | 16111.9         | 12.65         |
| 328.14584       |          | 8581.7          | 6.74          |

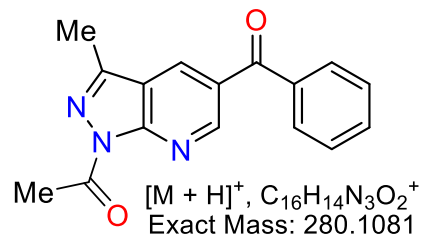

Fig. S21 HRMS analysis of 1-(5-benzoyl-3-methyl-1H-pyrazolo[3,4-b]pyridin-1-yl)ethan-1-one (**3g**)

## User Chromatograms

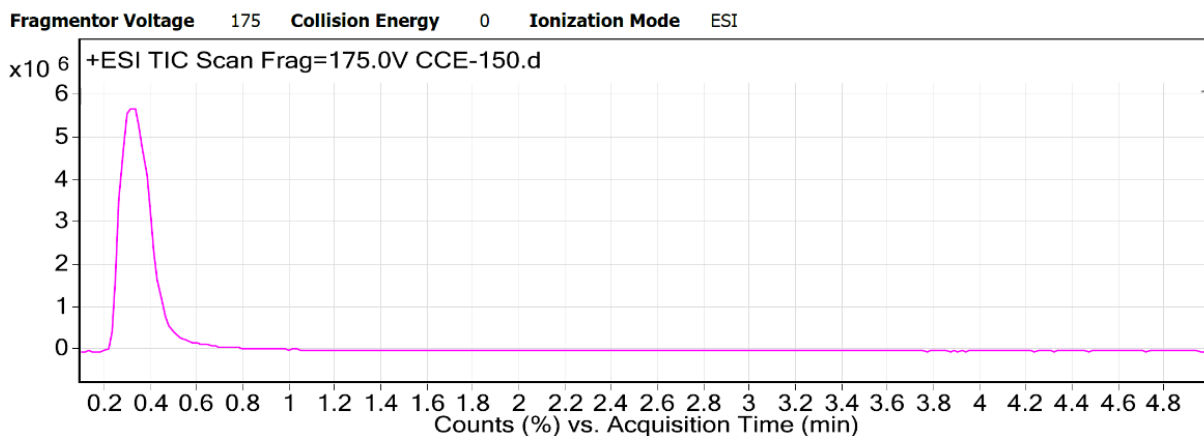

## User Spectra

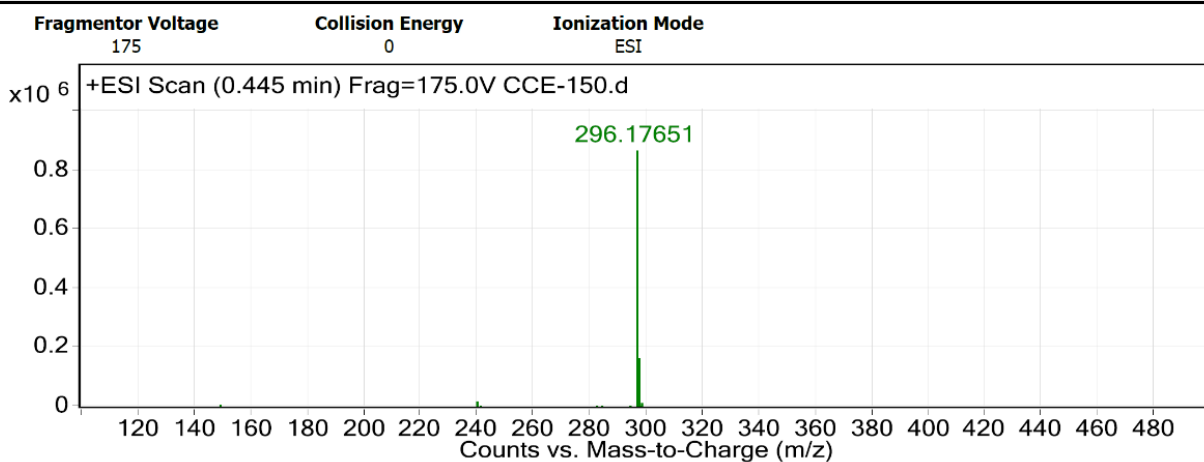

### Peak List

| m/z       | z | Abund    | HeightPercent |
|-----------|---|----------|---------------|
| 296.17651 | 1 | 867763.8 | 100           |
| 297.18054 | 1 | 163729.1 | 18.87         |

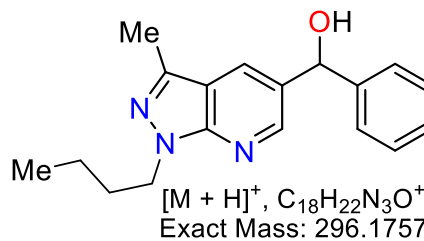

Fig. S22 HRMS analysis of (1-butyl-3-methyl-1H-pyrazolo[3,4-b]pyridin-5-yl)(phenyl)methanol (**4a**)

## User Chromatograms

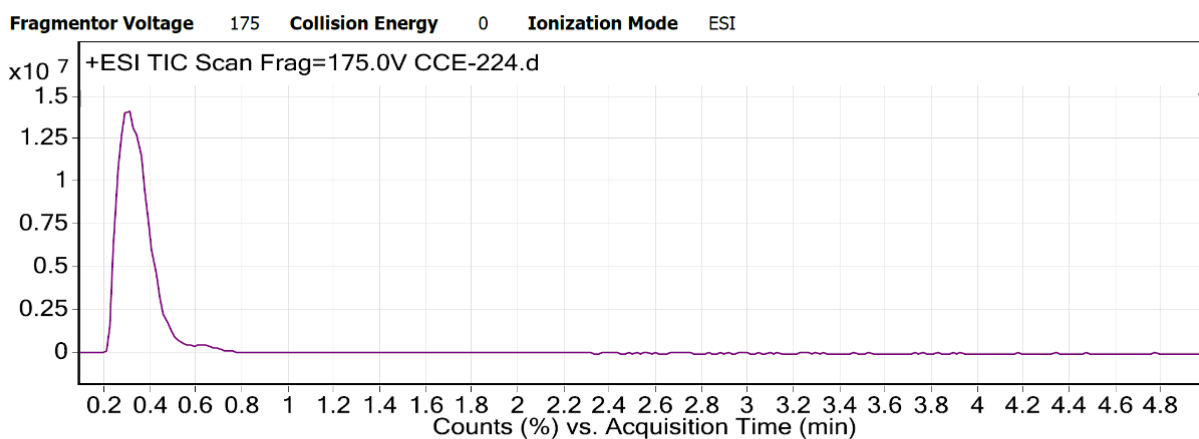

## User Spectra

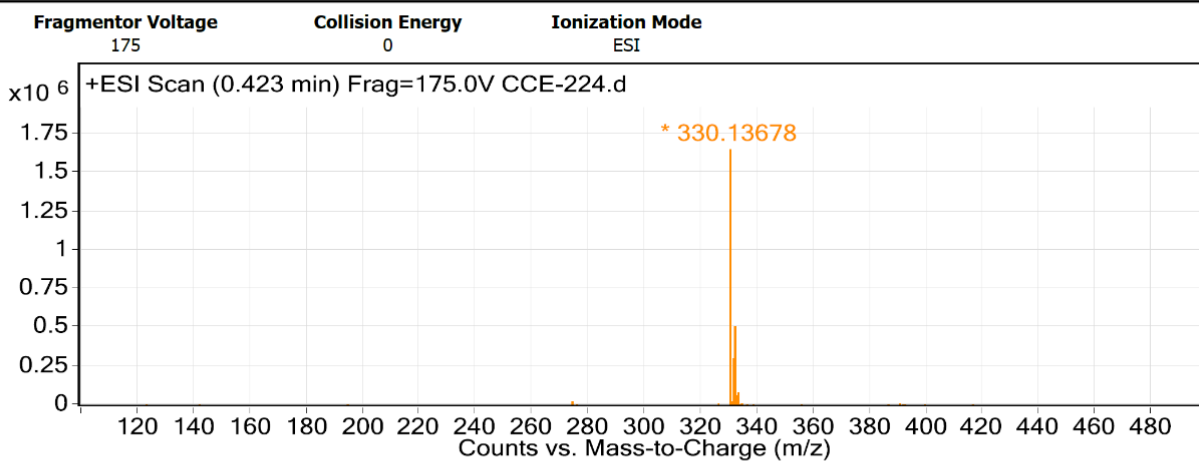

### Peak List

| m/z       | z | Abund     | HeightPercent |
|-----------|---|-----------|---------------|
| 330.13678 | 1 | 1654864.1 | 100           |
| 330.18206 |   | 127058.5  | 7.68          |
| 330.22362 |   | 89965.9   | 5.44          |
| 331.13971 | 1 | 304508.8  | 18.4          |
| 332.13398 | 1 | 510502.1  | 30.85         |
| 333.13725 | 1 | 92534.3   | 5.59          |

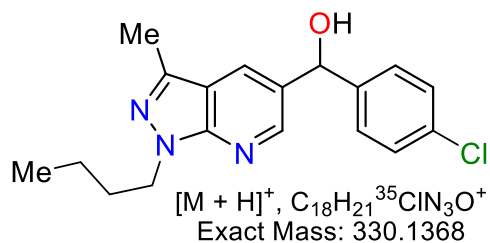

Fig. S23 HRMS analysis of (1-butyl-3-methyl-1H-pyrazolo[3,4-b]pyridin-5-yl)(4-chlorophenyl)methanol (**4b**)



## 5. Copies of NMR spectra

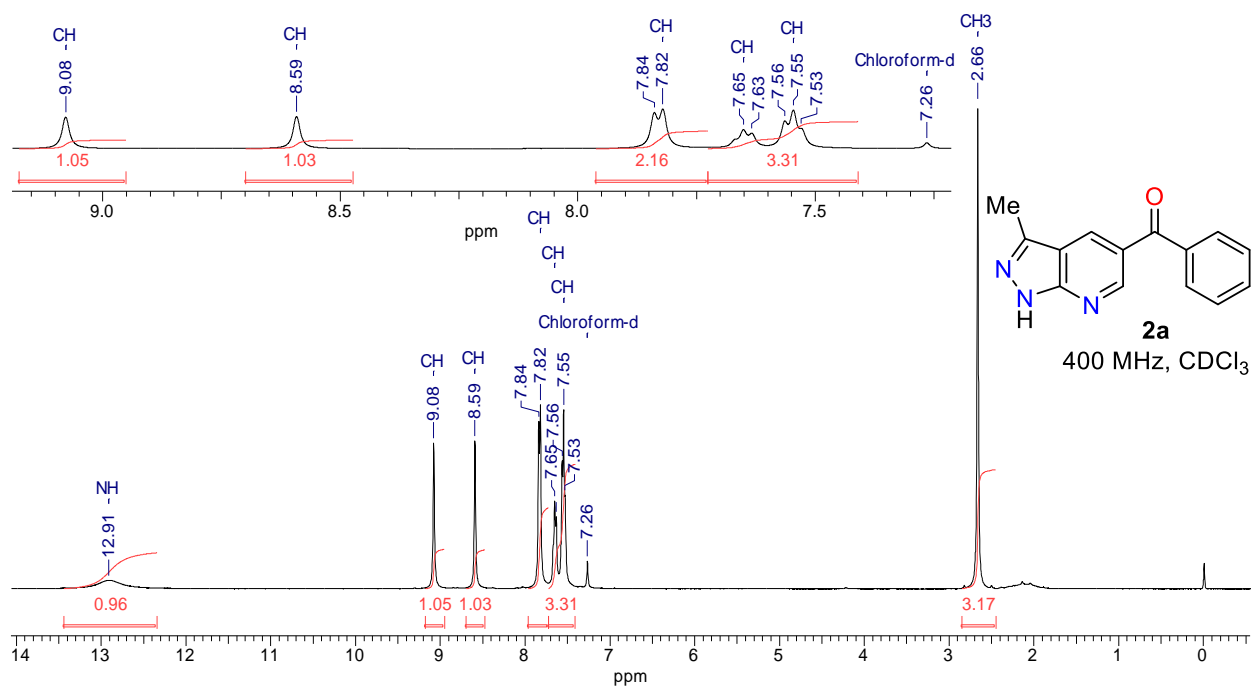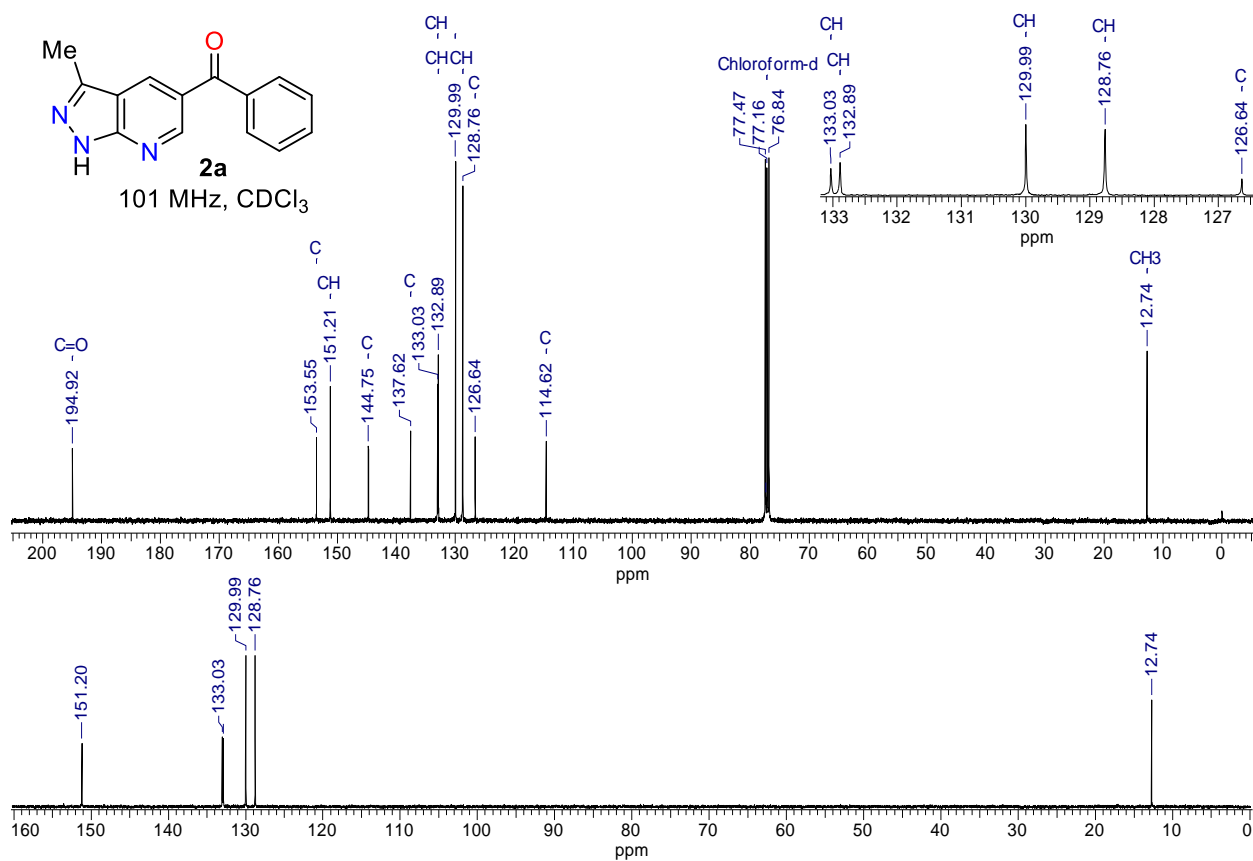

Fig. S24 <sup>1</sup>H, <sup>13</sup>C, and DEPT-135 spectra of the 5-benzoyl-1H-pyrazolo[3,4-b]pyridine **2a**

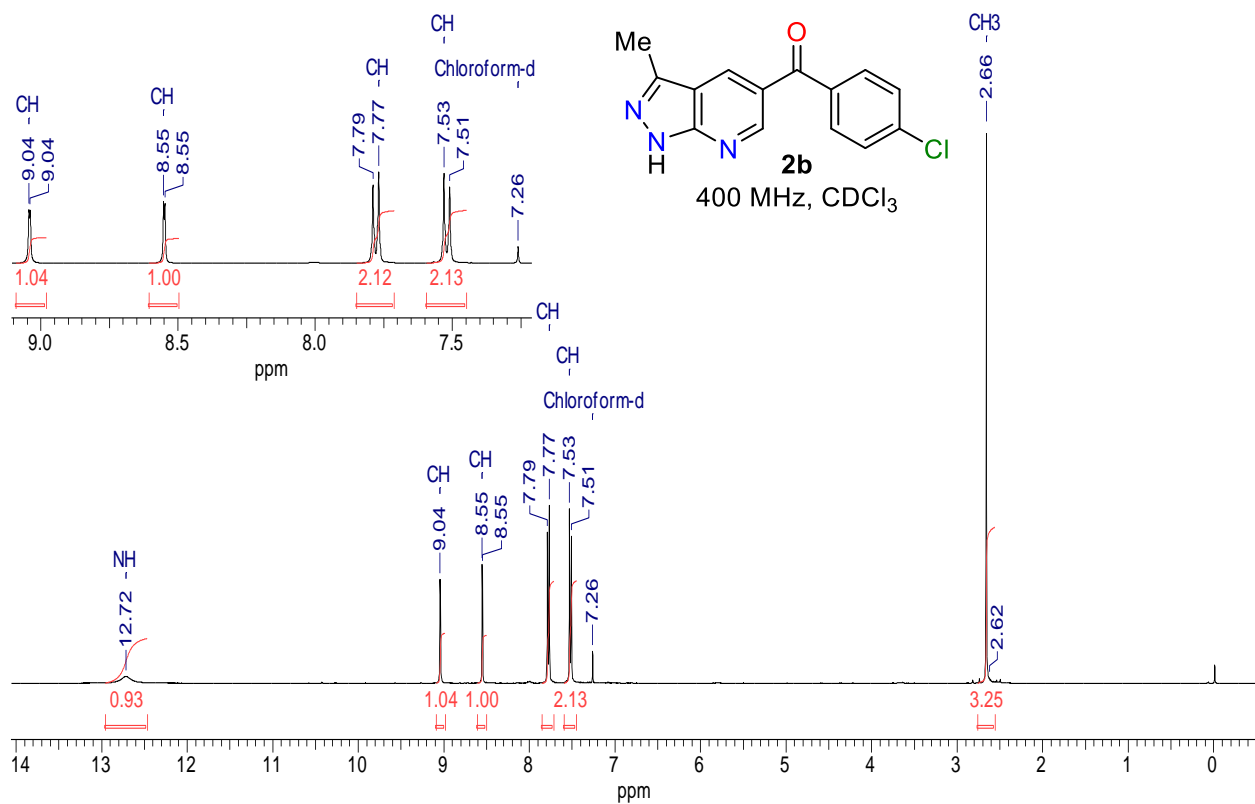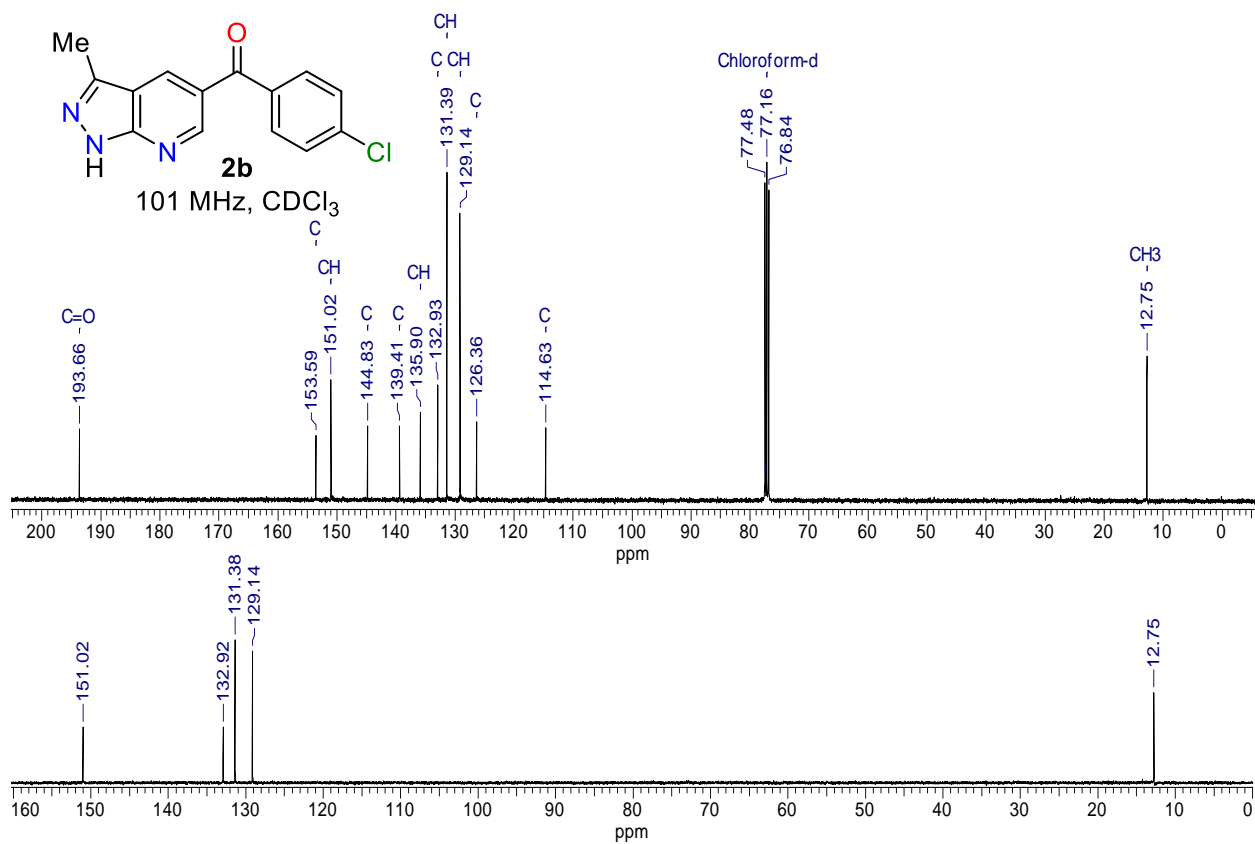

Fig. S25 <sup>1</sup>H, <sup>13</sup>C, and DEPT-135 spectra of the 5-(4-chlorobenzoyl)-1H-pyrazolo[3,4-b]pyridine **2b**

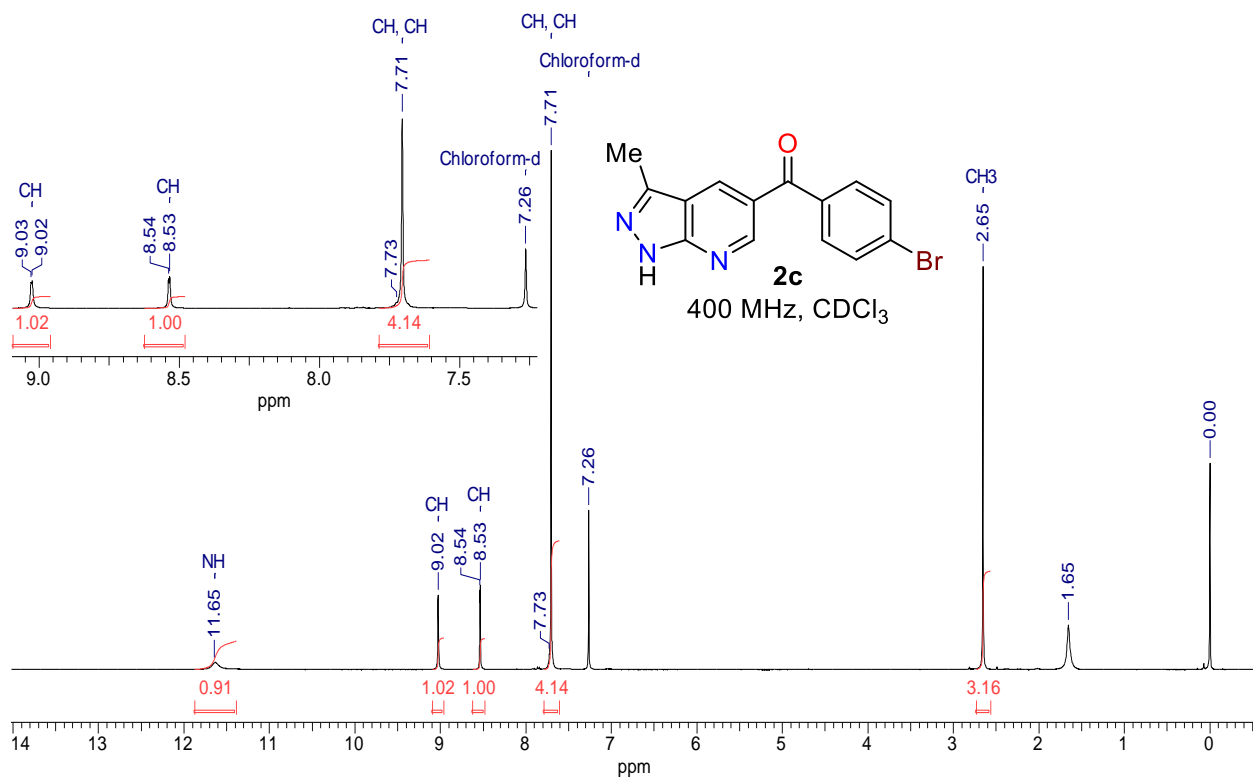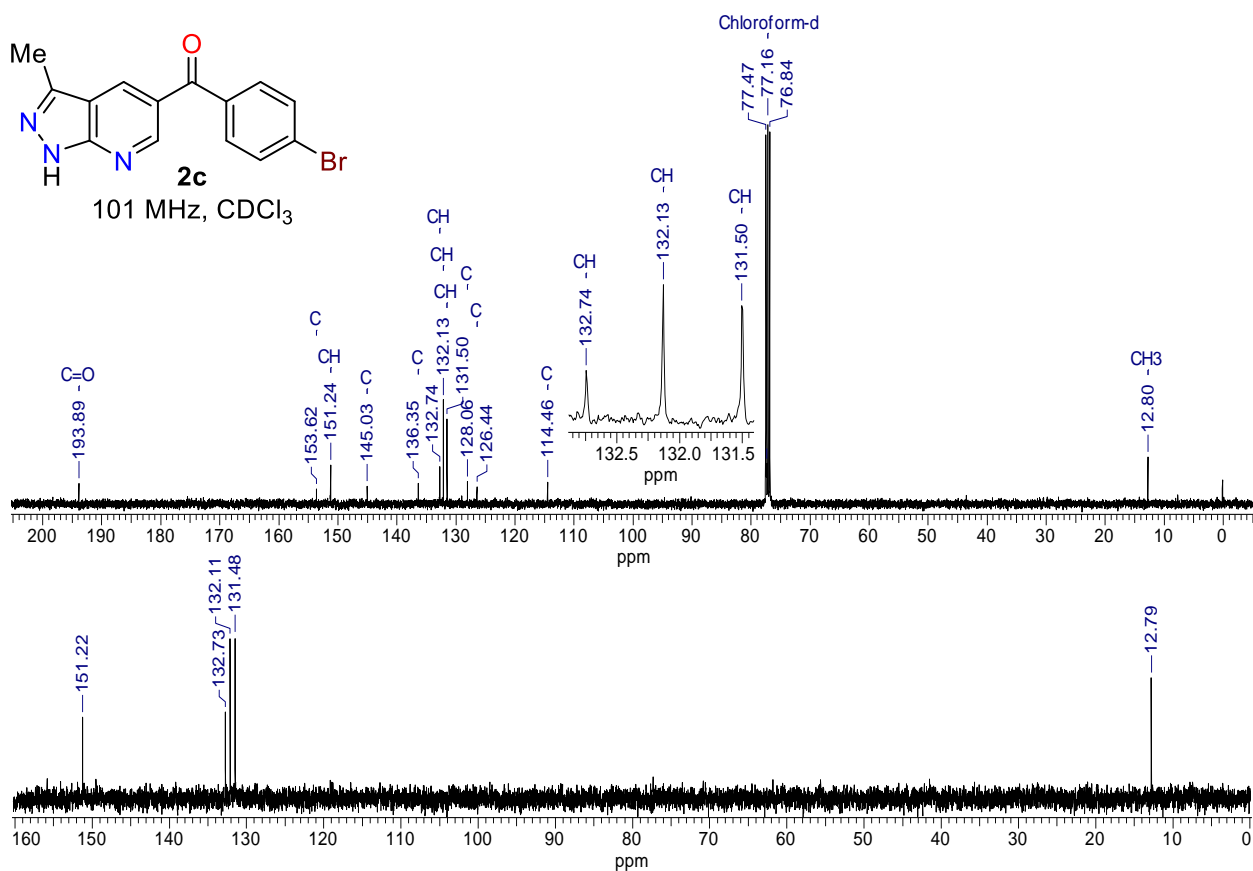

Fig. S26 <sup>1</sup>H, <sup>13</sup>C, and DEPT-135 spectra of the 5-(4-bromobenzoyl)-1H-pyrazolo[3,4-b]pyridine 2c

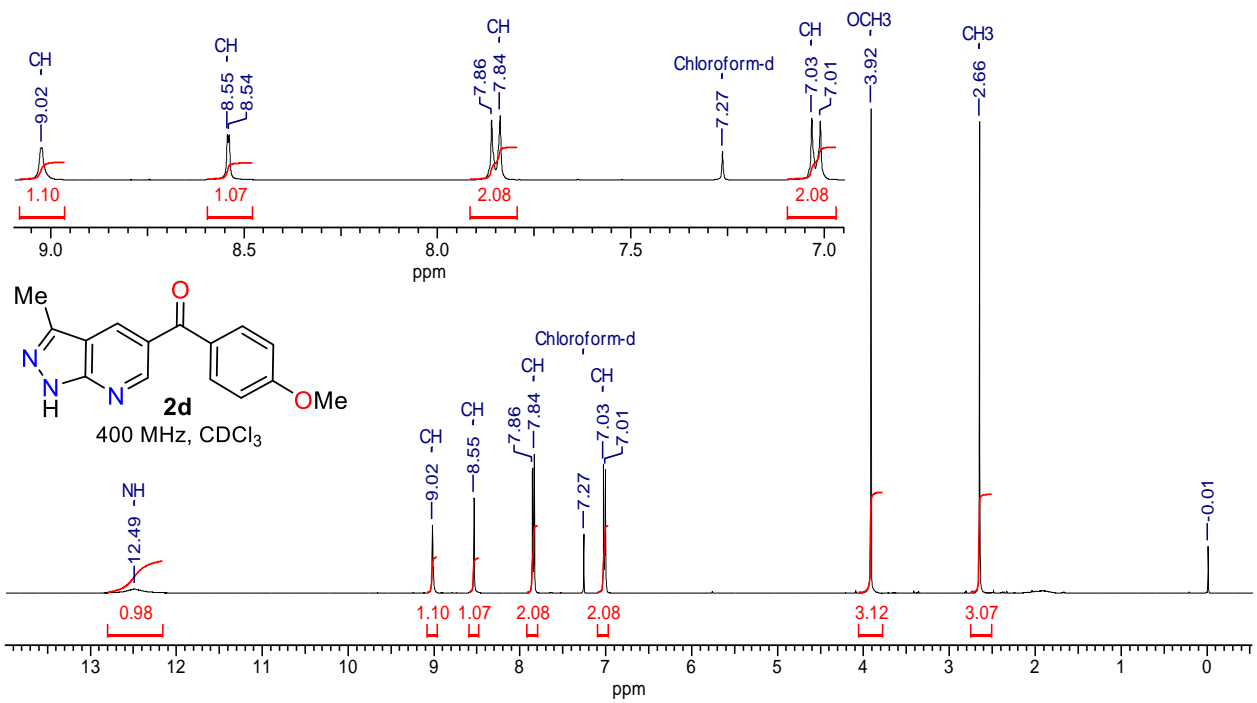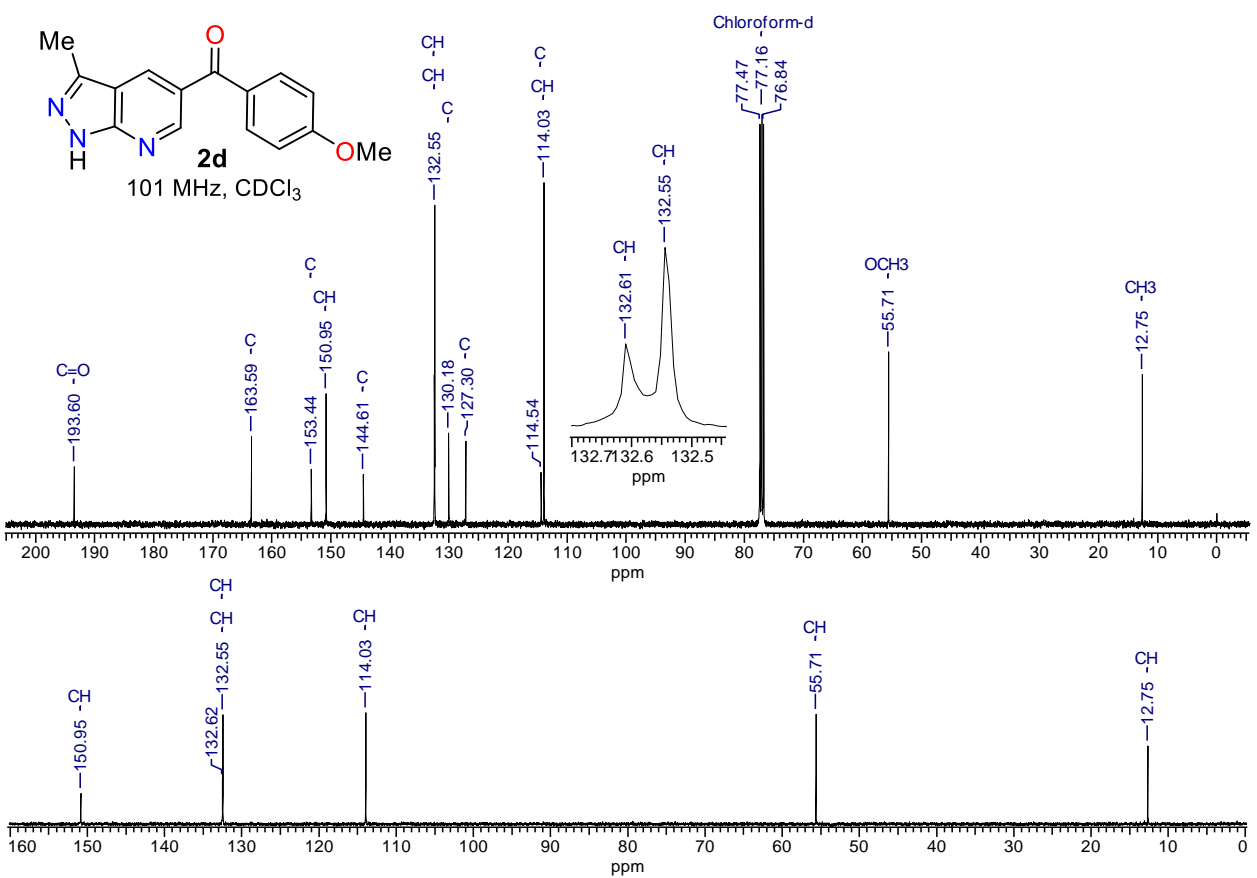

**Fig. S27** <sup>1</sup>H, <sup>13</sup>C, and DEPT-135 spectra of the 5-(4-methoxybenzoyl)-1*H*-pyrazolo[3,4-*b*]pyridine **2d**

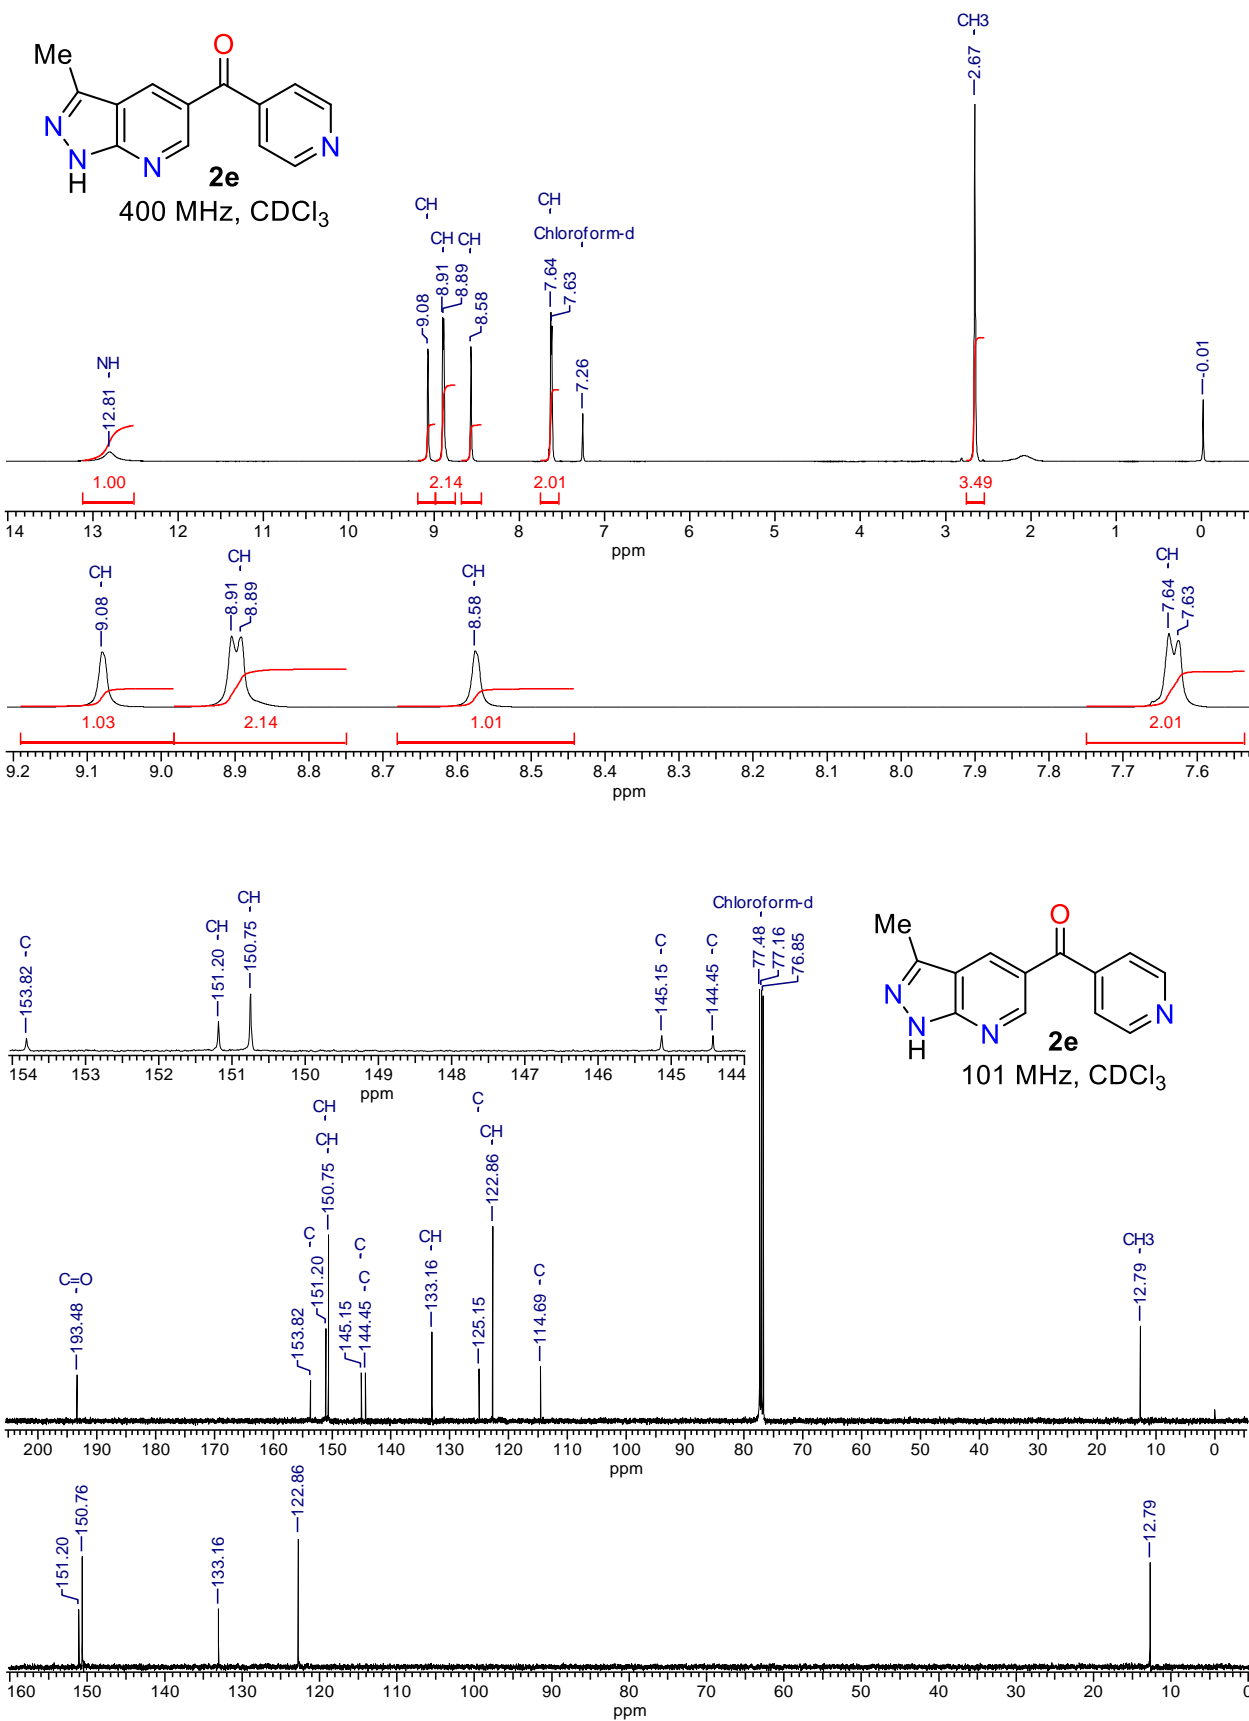

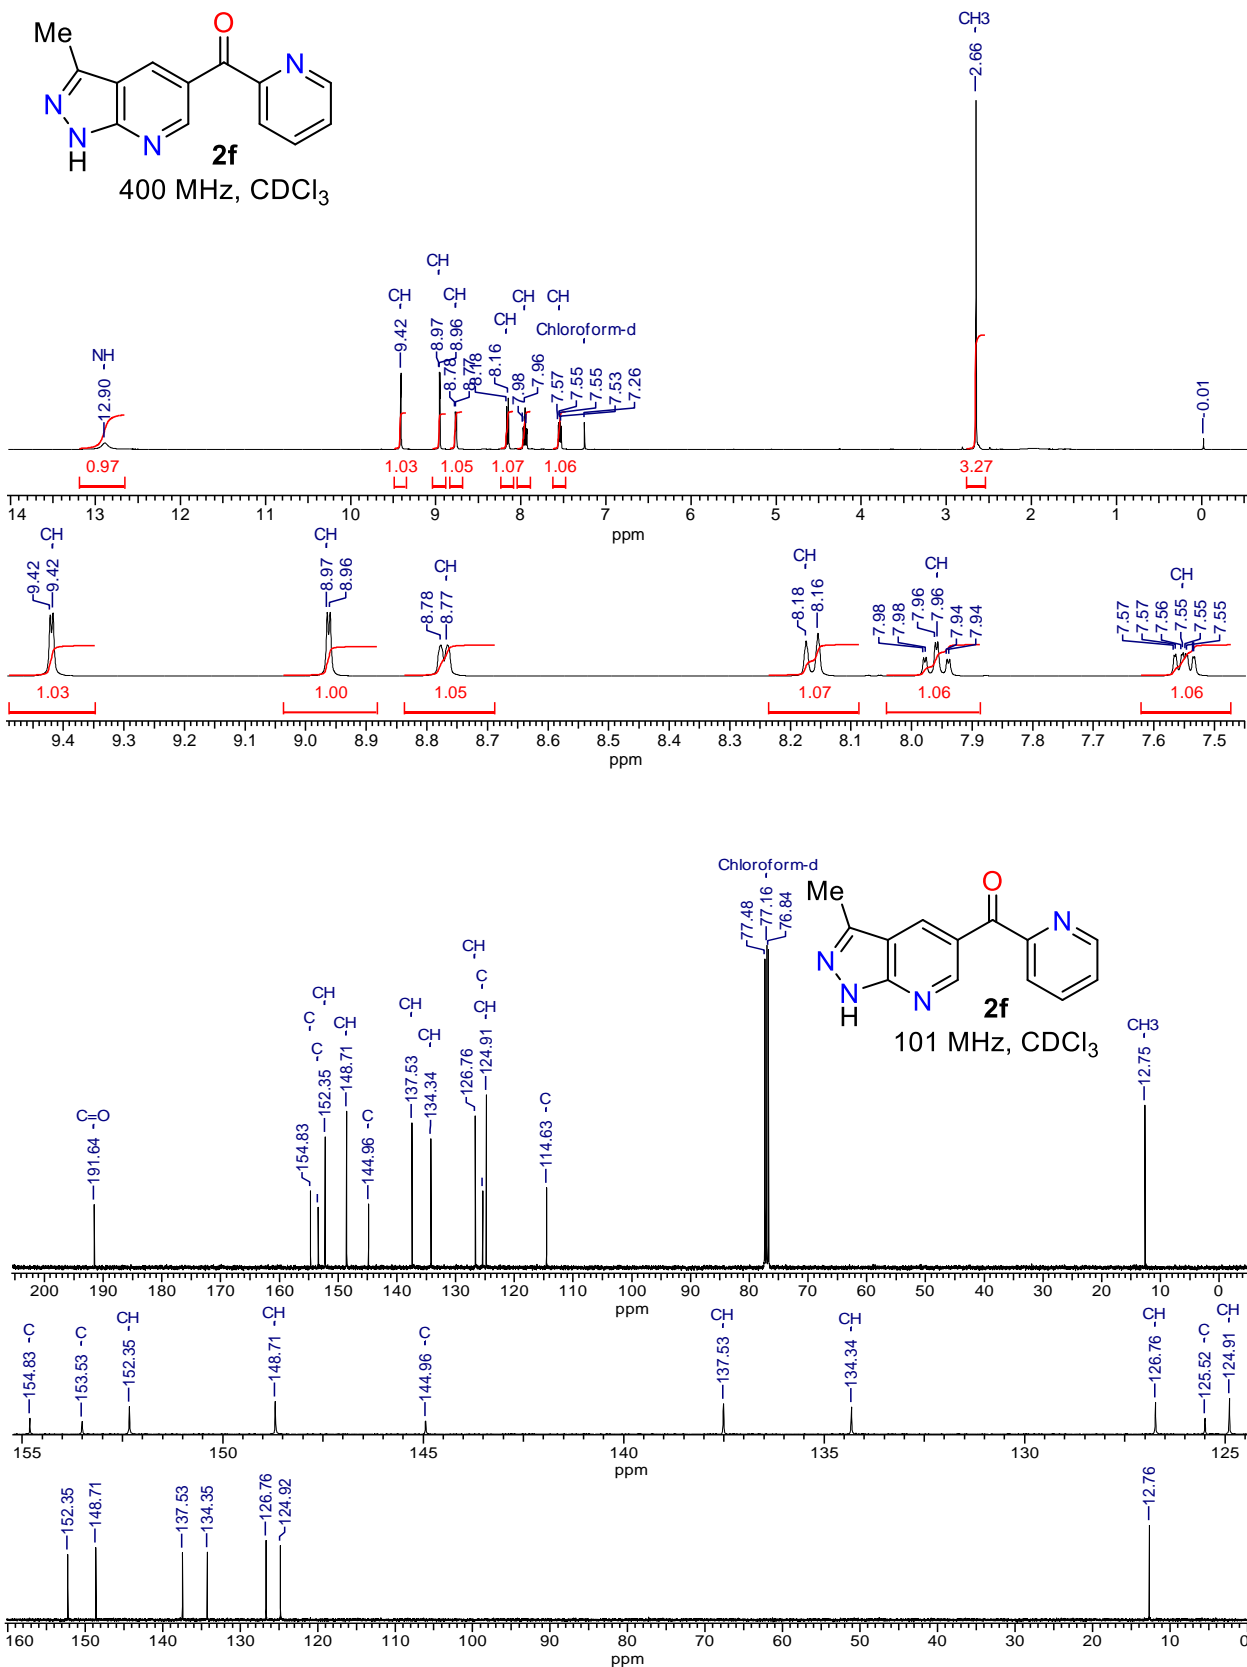

Fig. S29. <sup>1</sup>H, <sup>13</sup>C, and DEPT-135 spectra of the 5-(2-pyridinyl)-1H-pyrazolo[3,4-b]pyridine **2f**

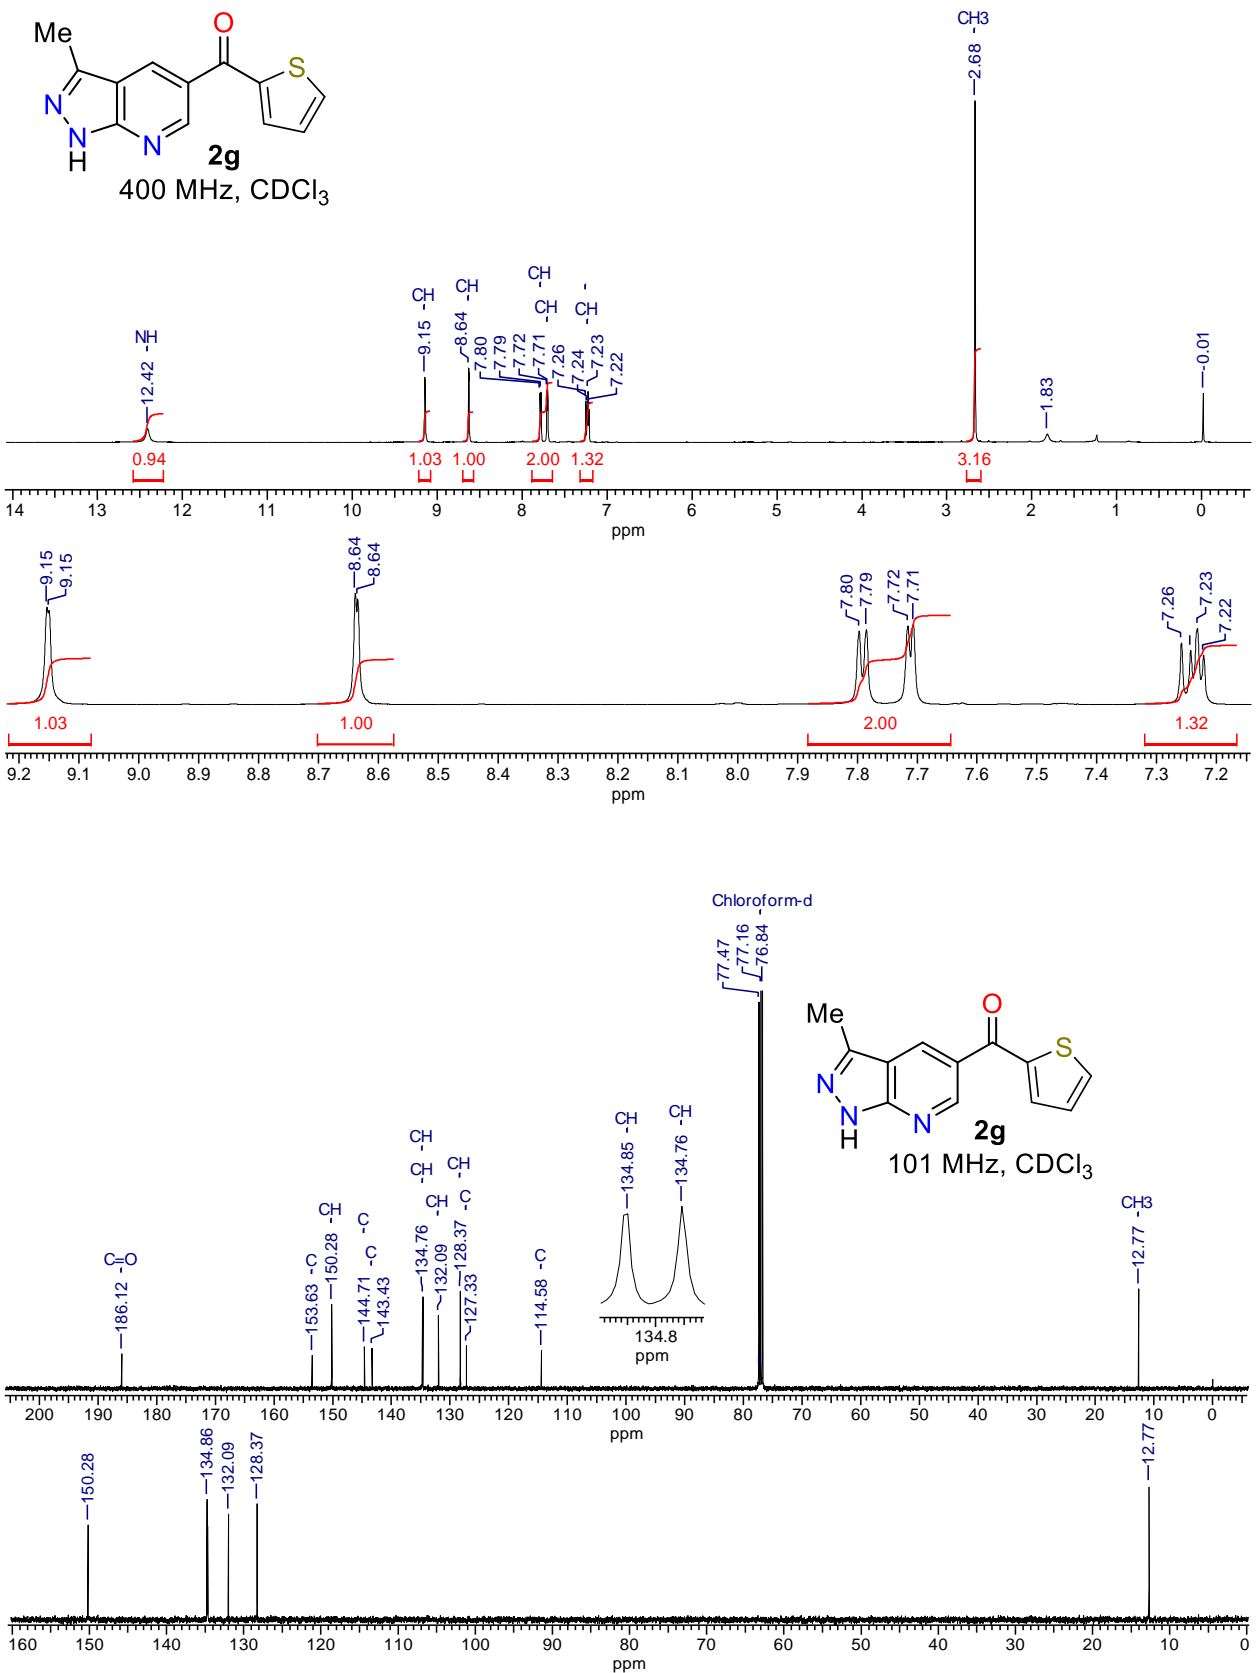

Fig. S30 <sup>1</sup>H, <sup>13</sup>C, and DEPT-135 spectra of the 5-(2-thienoyl)-1H-pyrazolo[3,4-b]pyridine **2g**

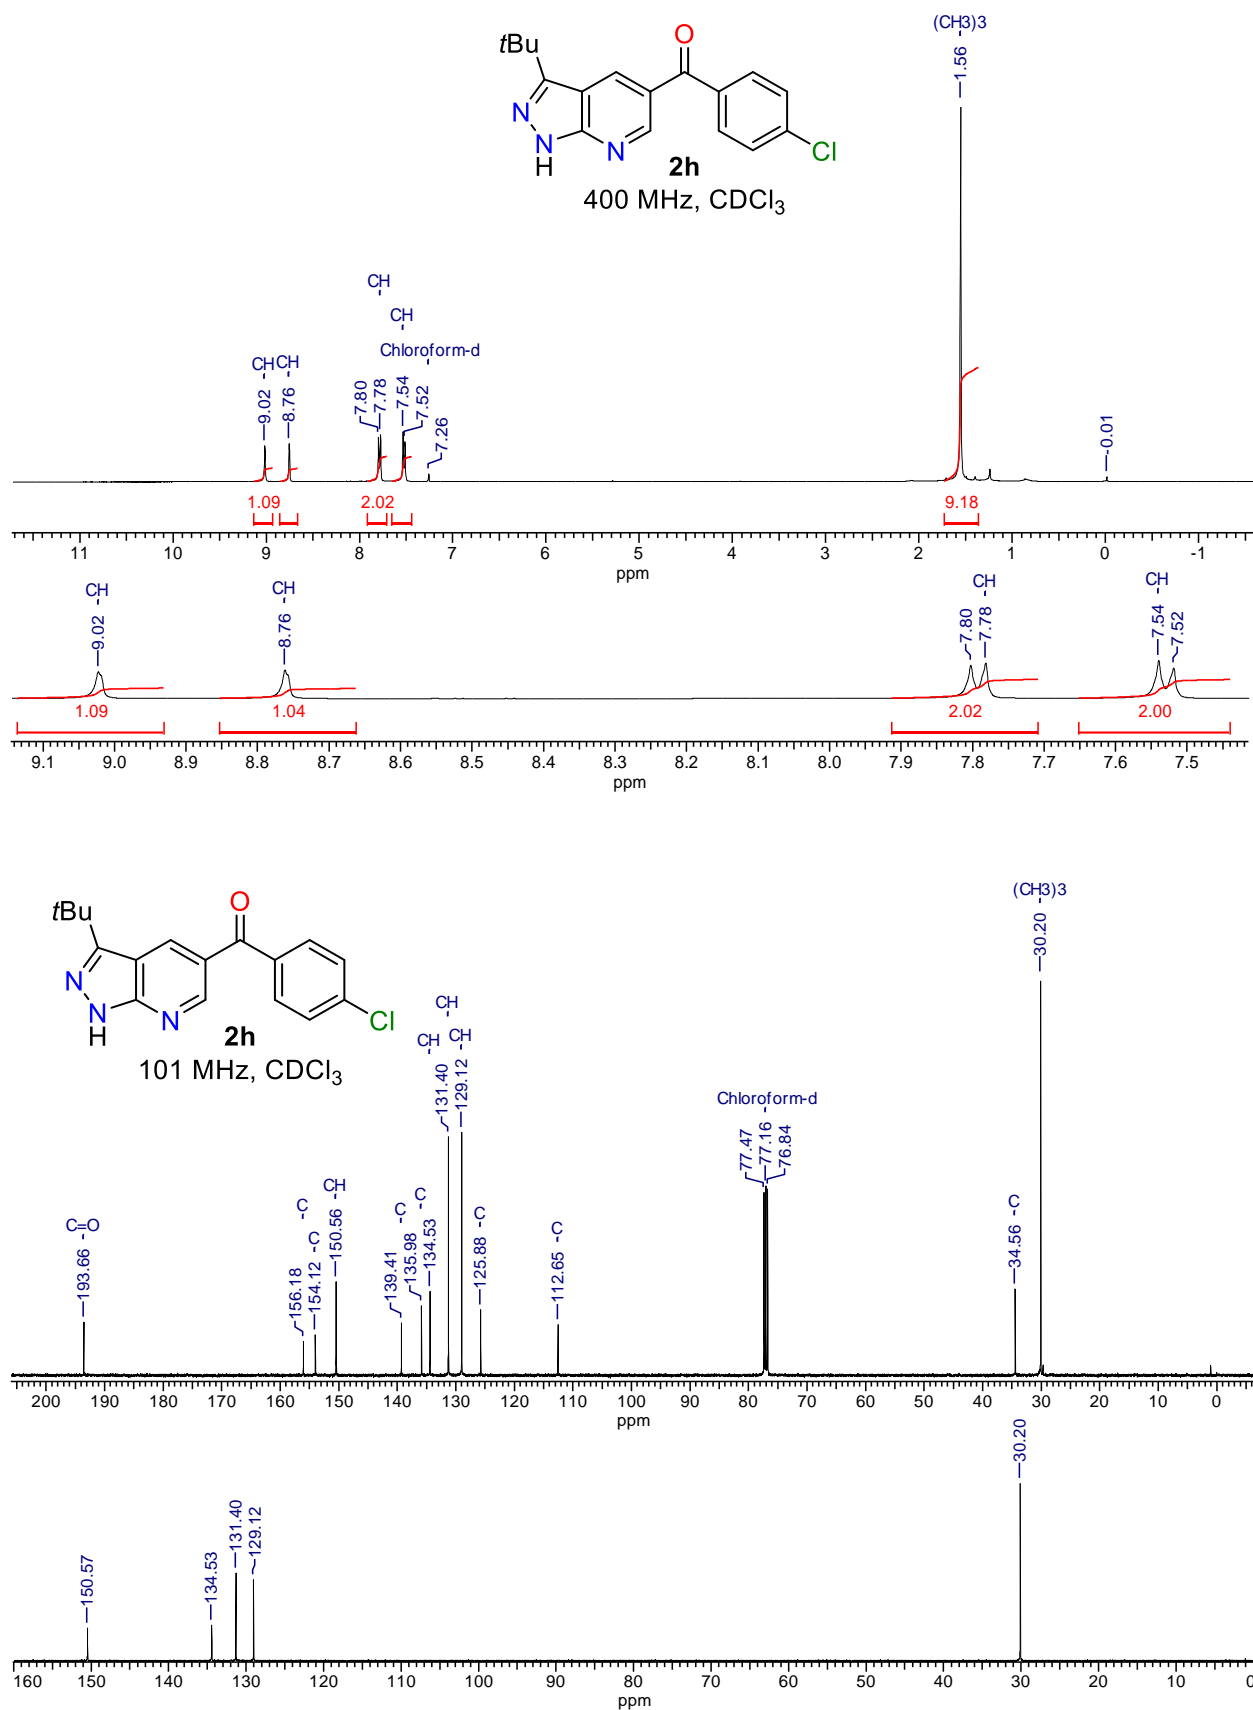

**Fig. S31** <sup>1</sup>H, <sup>13</sup>C, and DEPT-135 spectra of the 5-(4-chlorobenzoyl)-1*H*-pyrazolo[3,4-*b*]pyridine **2h**



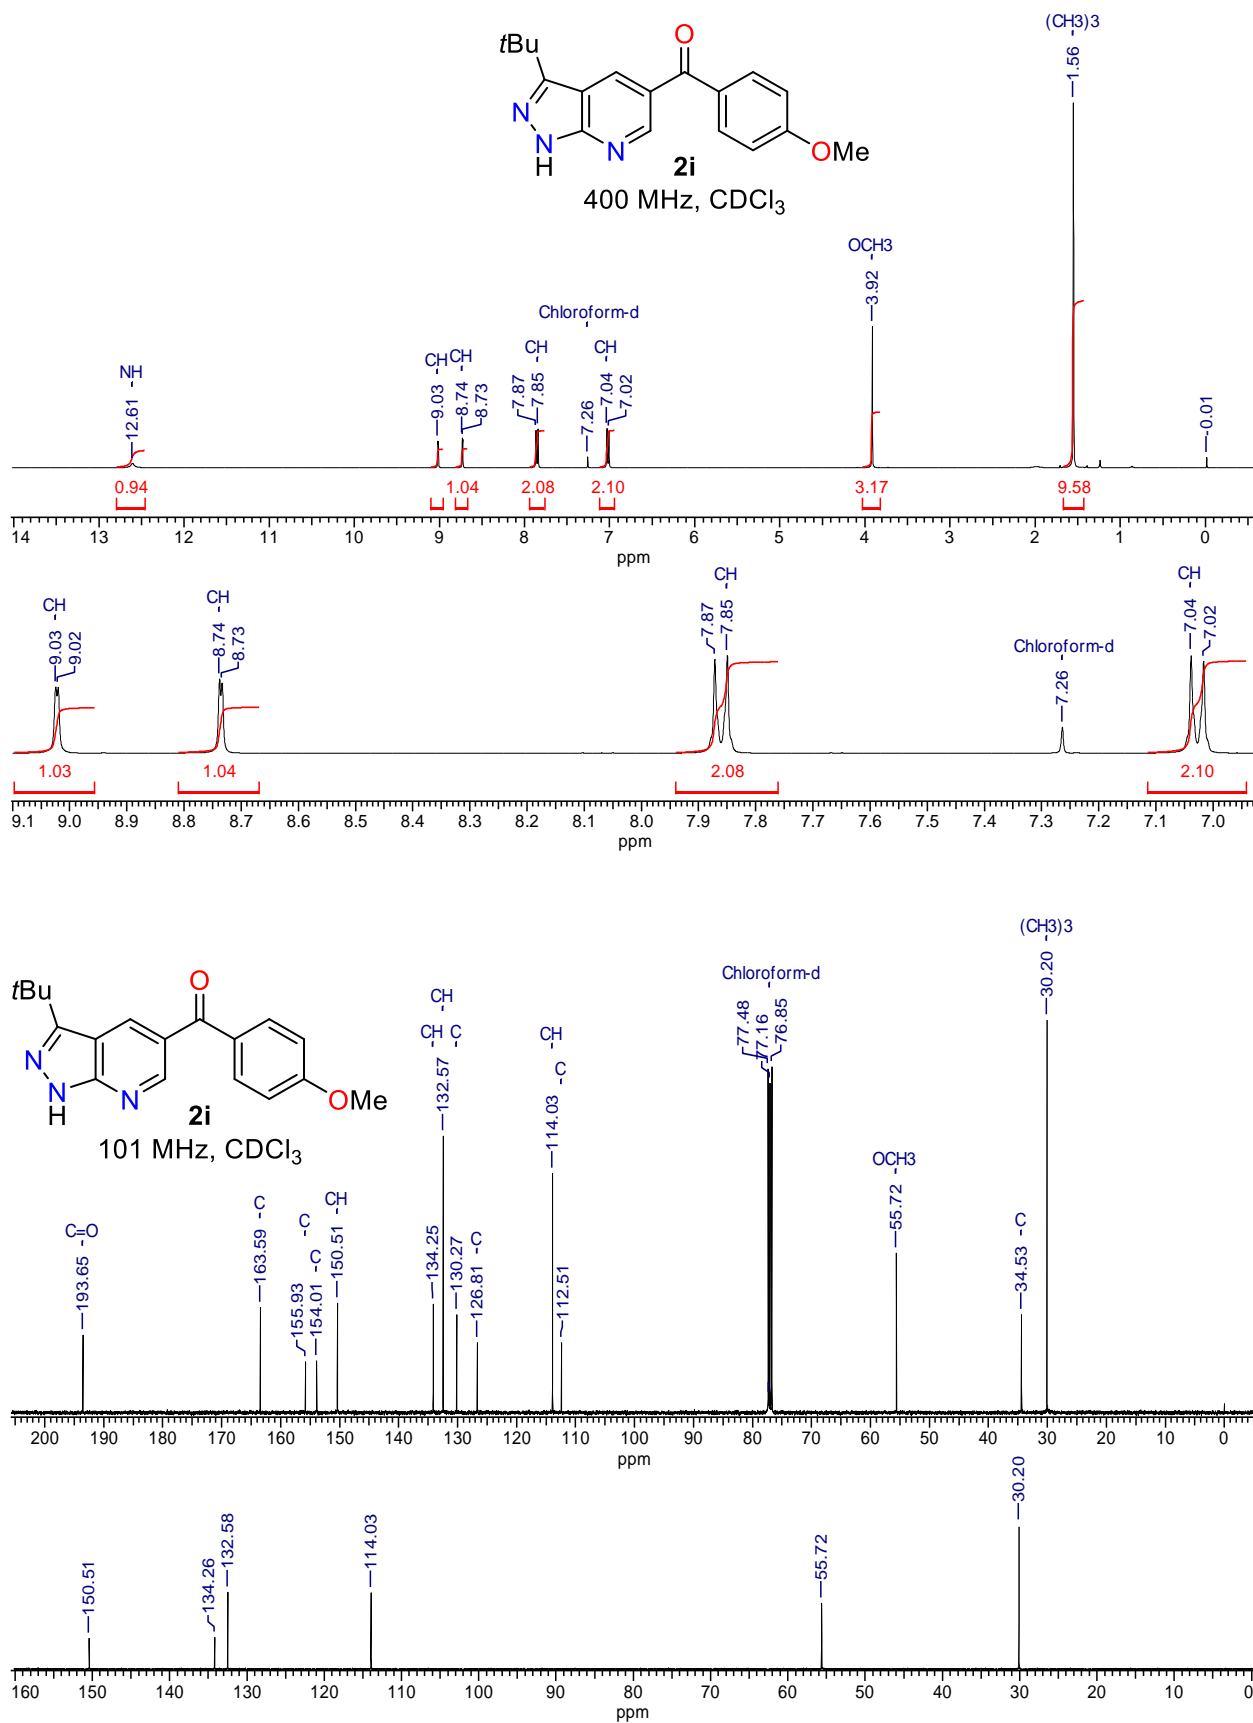

**Fig. S32** <sup>1</sup>H, <sup>13</sup>C, and DEPT-135 spectra of the 5-(4-methoxybenzoyl)-1*H*-pyrazolo[3,4-*b*]pyridine **2i**

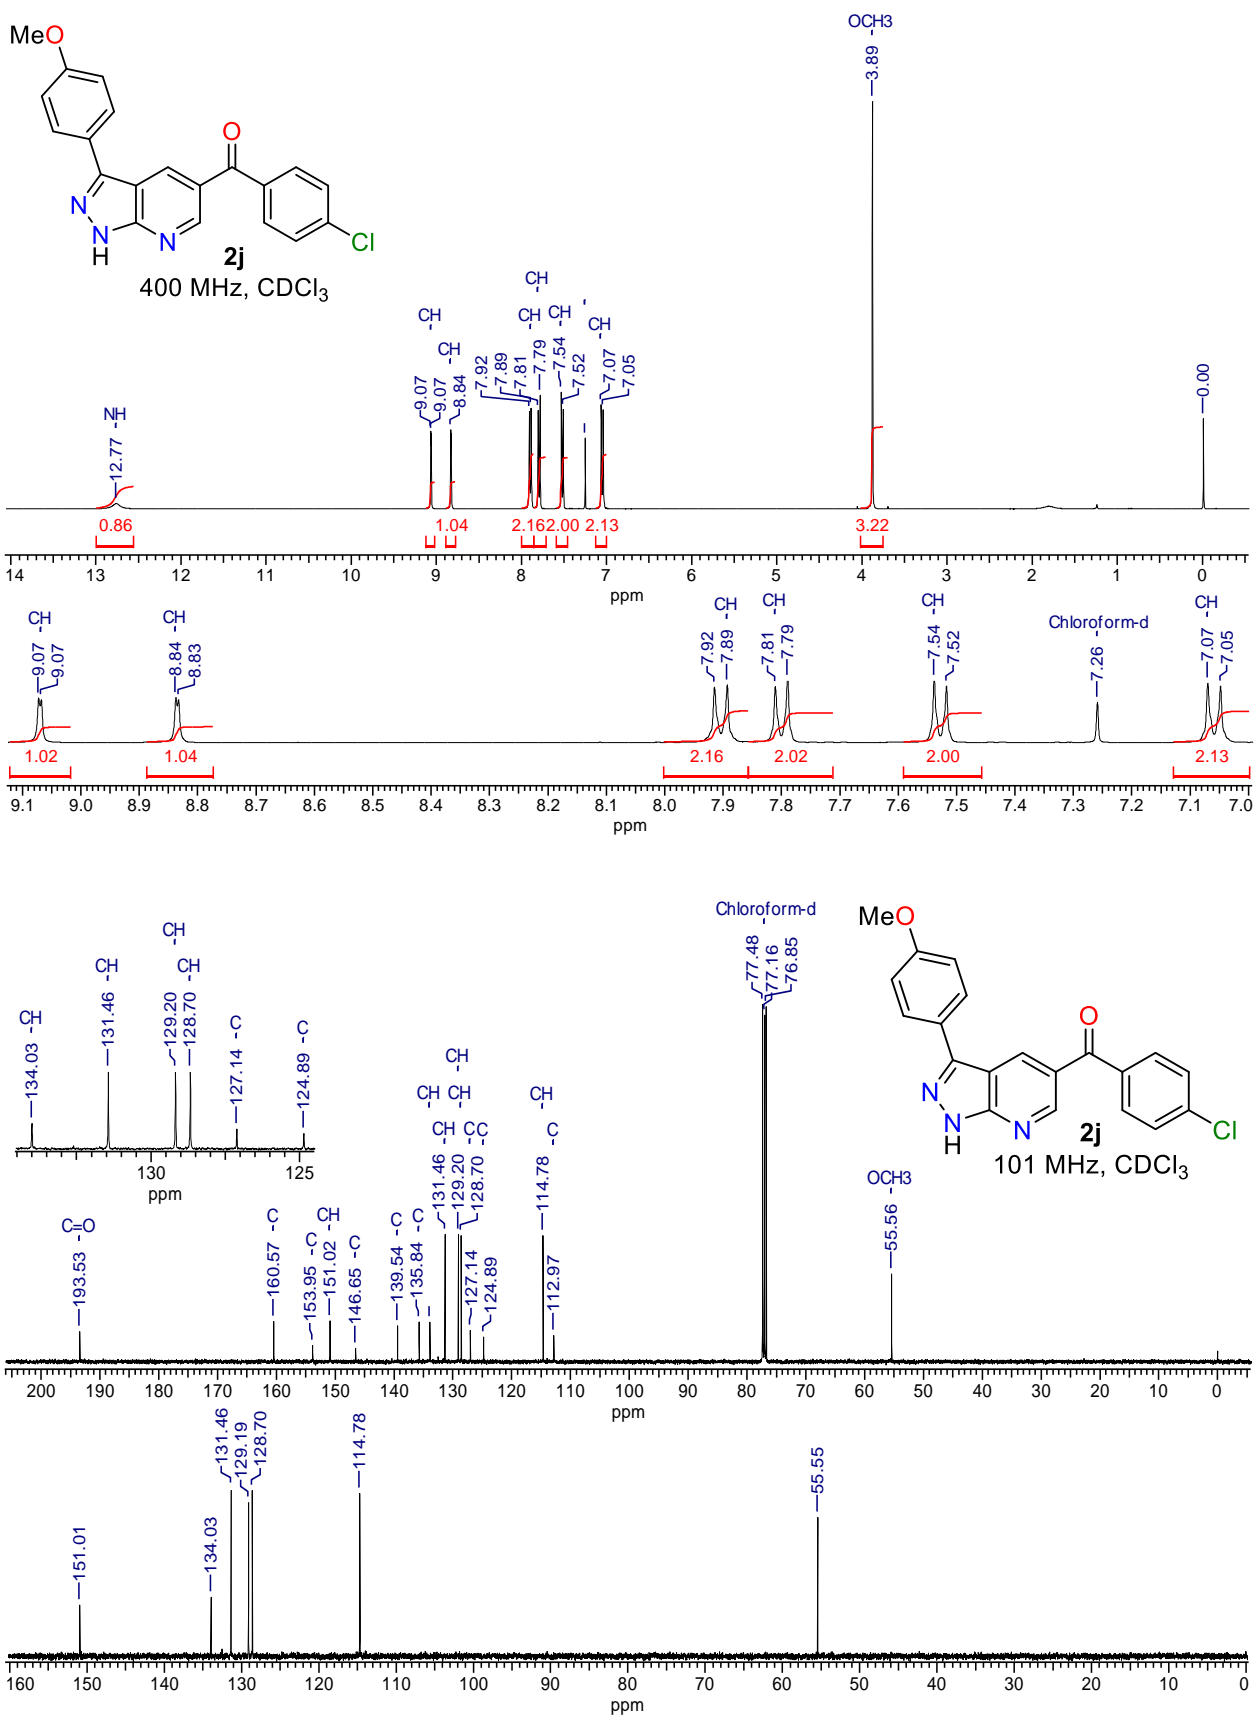

**Fig. S33** <sup>1</sup>H, <sup>13</sup>C, and DEPT-135 spectra of the 3-aryl-5-(4-chlorobenzoyl)-1H-pyrazolo[3,4-b]pyridine **2j**

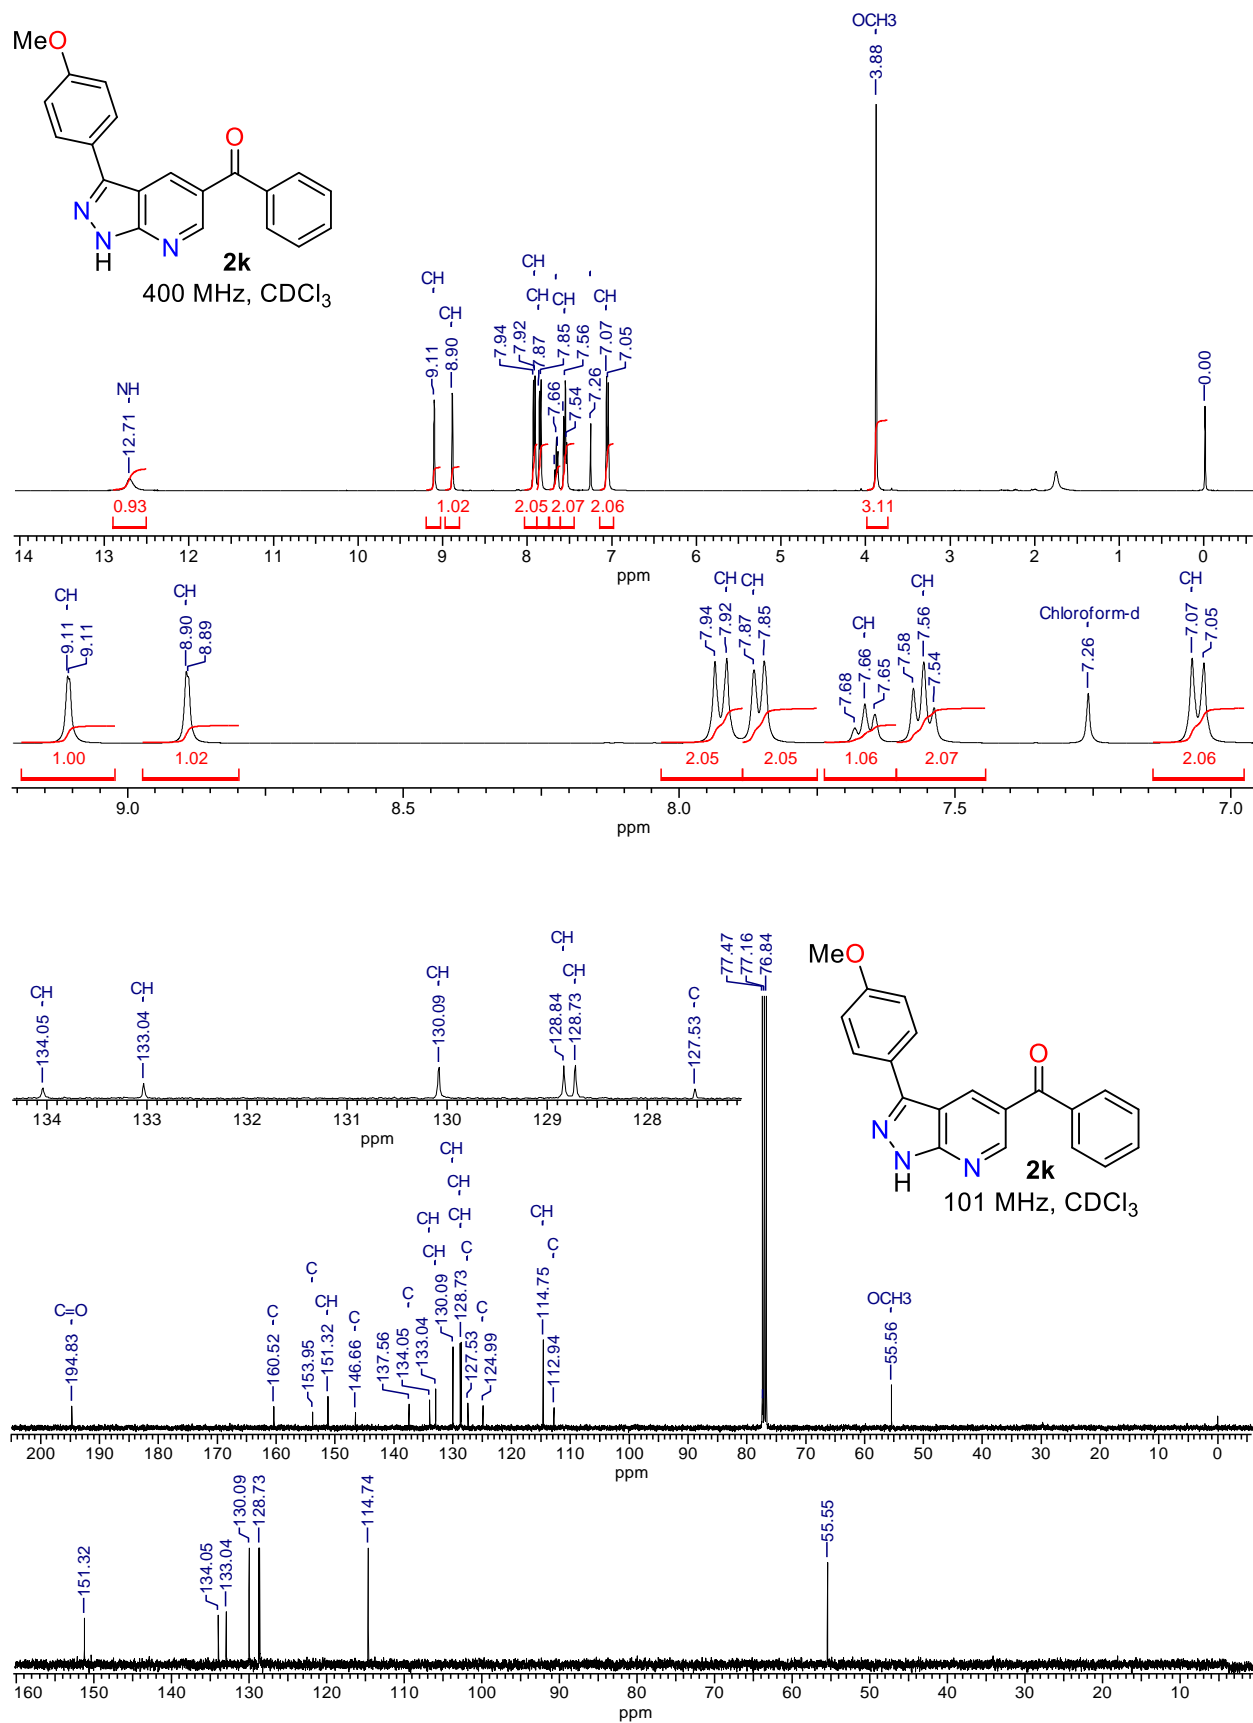

Fig. S34 <sup>1</sup>H, <sup>13</sup>C, and DEPT-135 spectra of the 3-aryl-5-benzoyl-1*H*-pyrazolo[3,4-*b*]pyridine **2k**

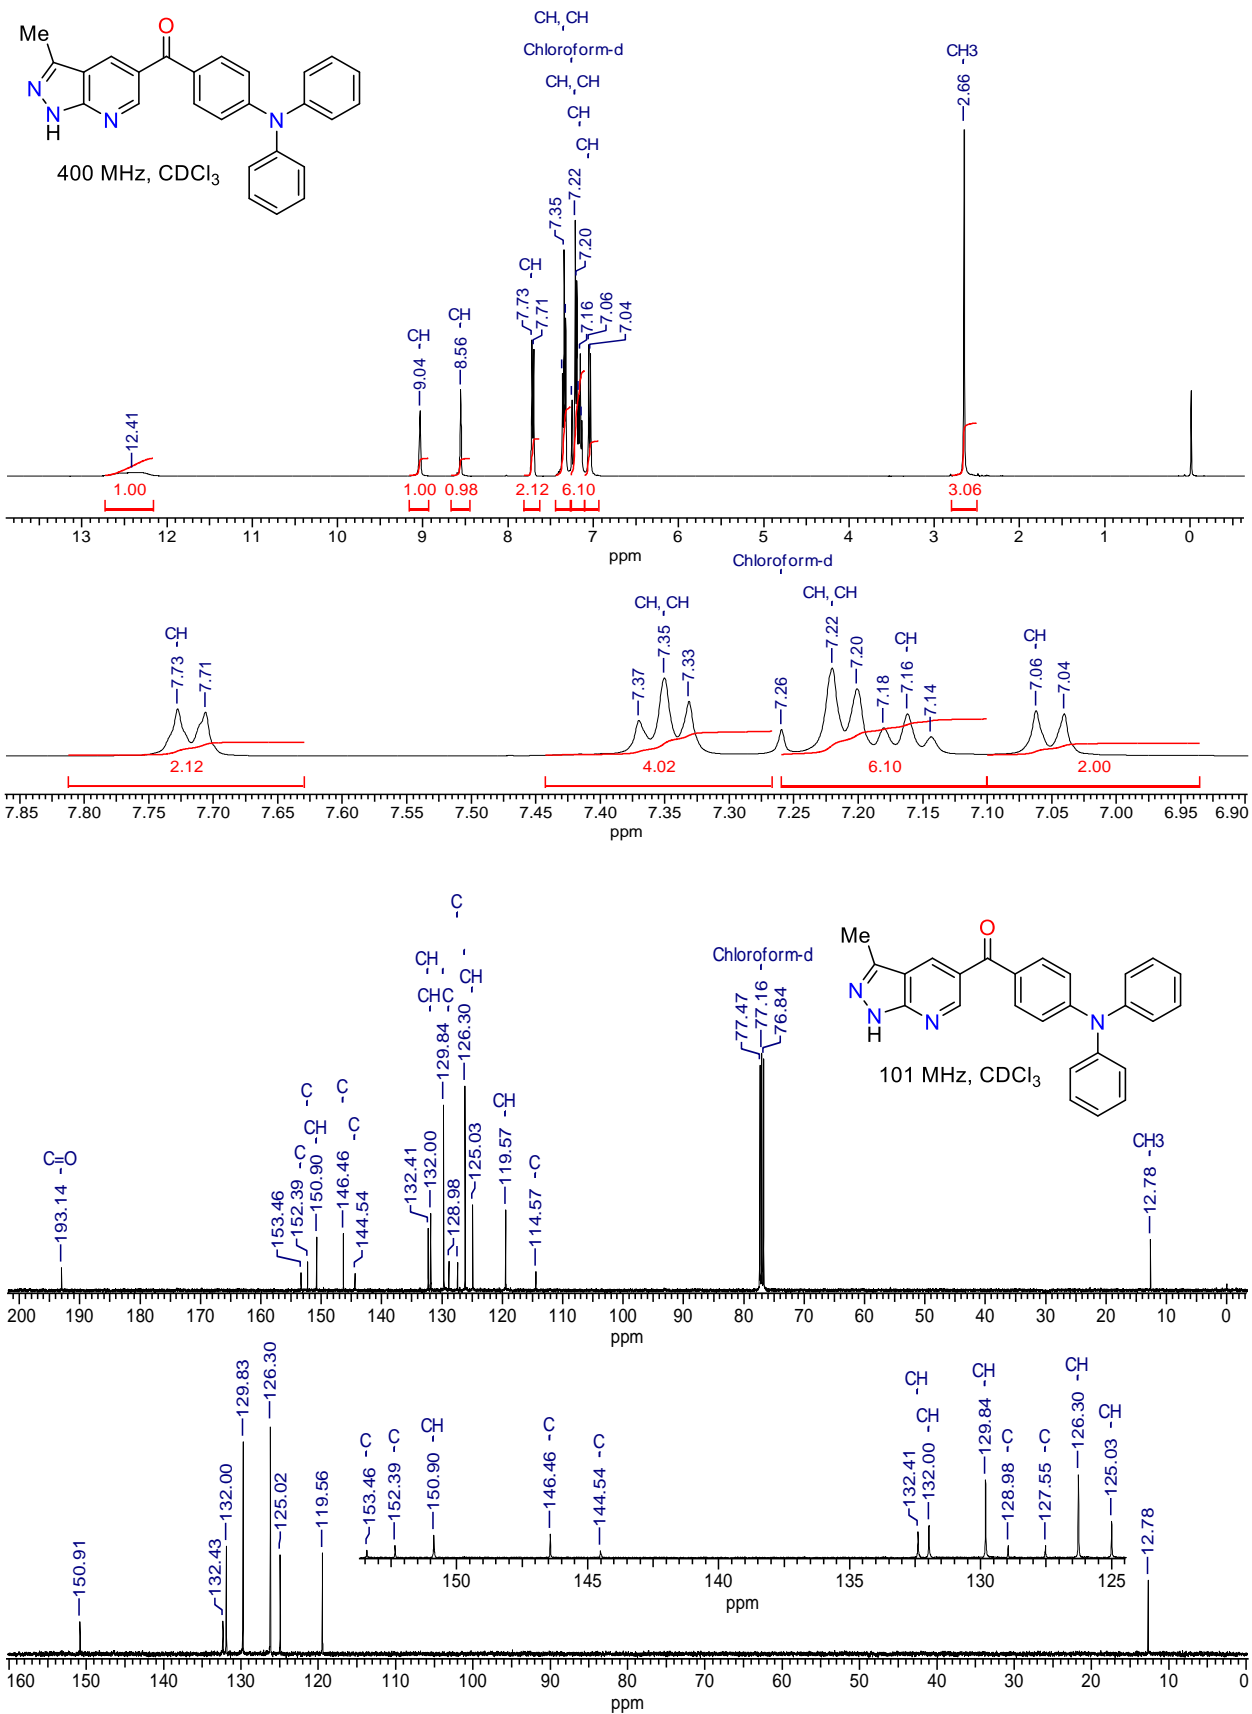

Fig. S35 <sup>1</sup>H, <sup>13</sup>C, and DEPT-135 spectra of the 5-(4-difenilaminobenzoyl)-1H-pyrazolo[3,4-b]pyridine **2I**

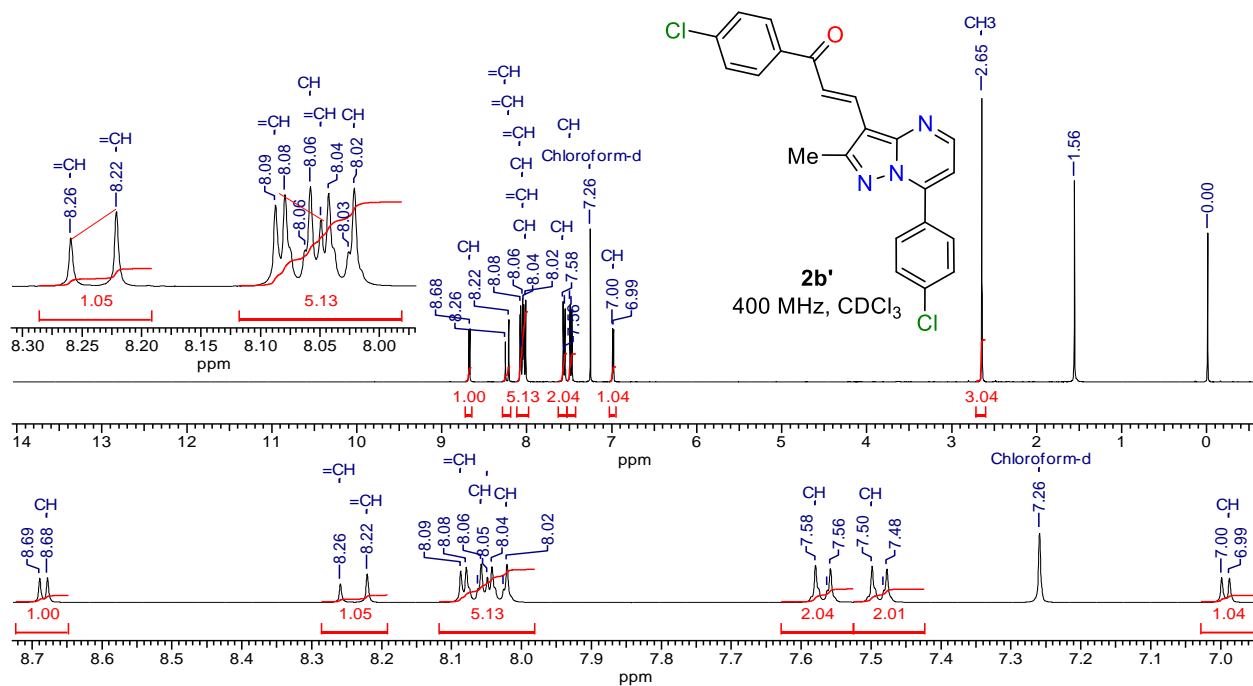

Fig. S36  $^1\text{H}$  spectra of the chalcone derivative **2'**

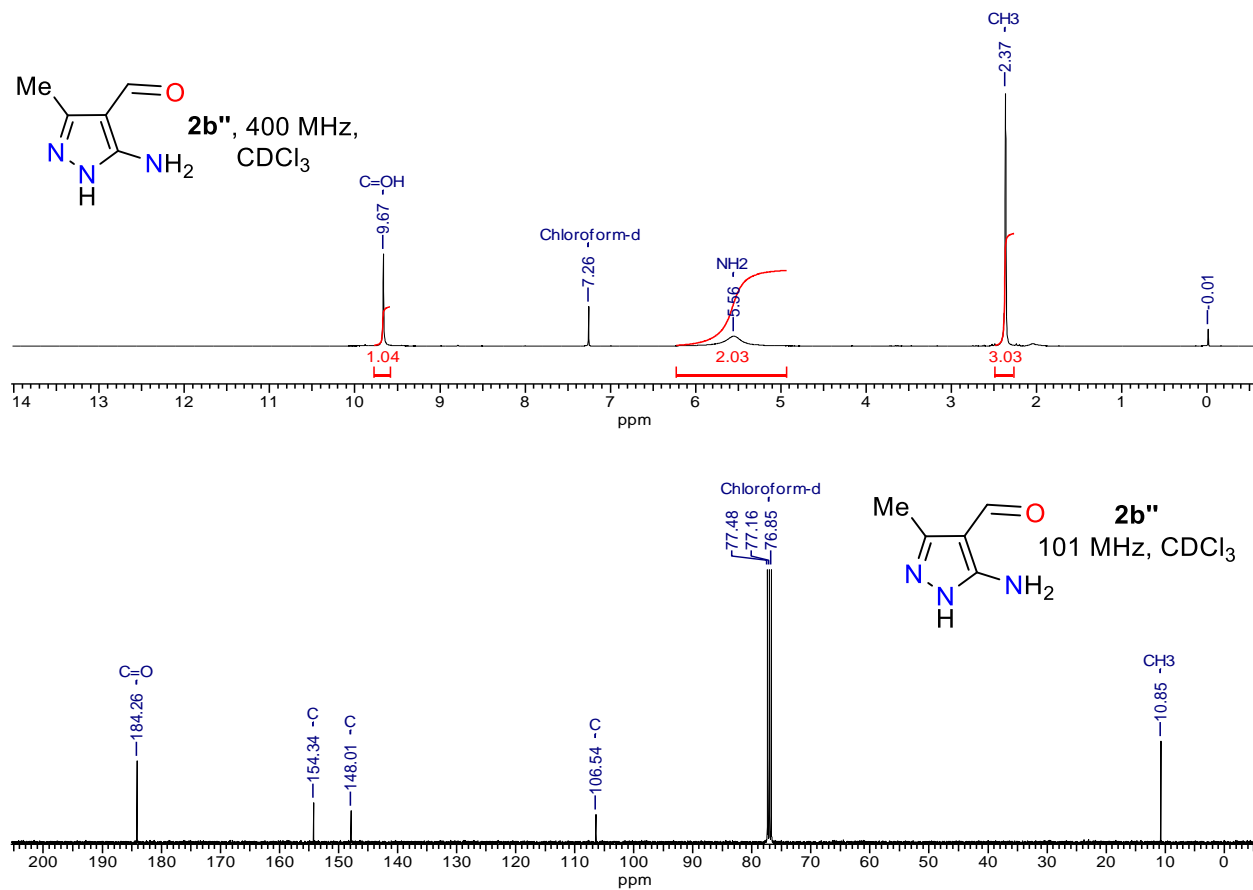

Fig. S37  $^1\text{H}$ ,  $^{13}\text{C}\{^1\text{H}\}$ , and DEPT-135 of 5-amino-3-methyl-1H-pyrazole-4-carbaldehyde (**2''**)

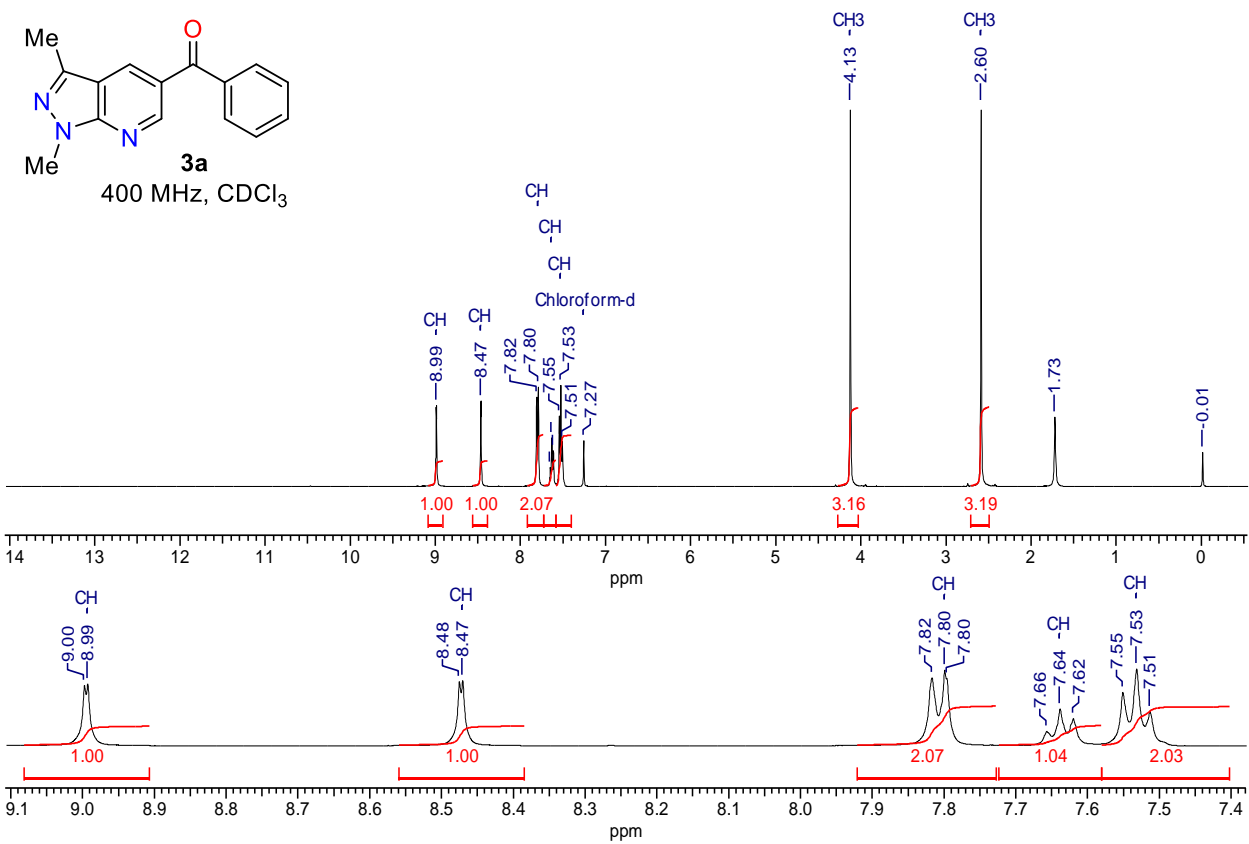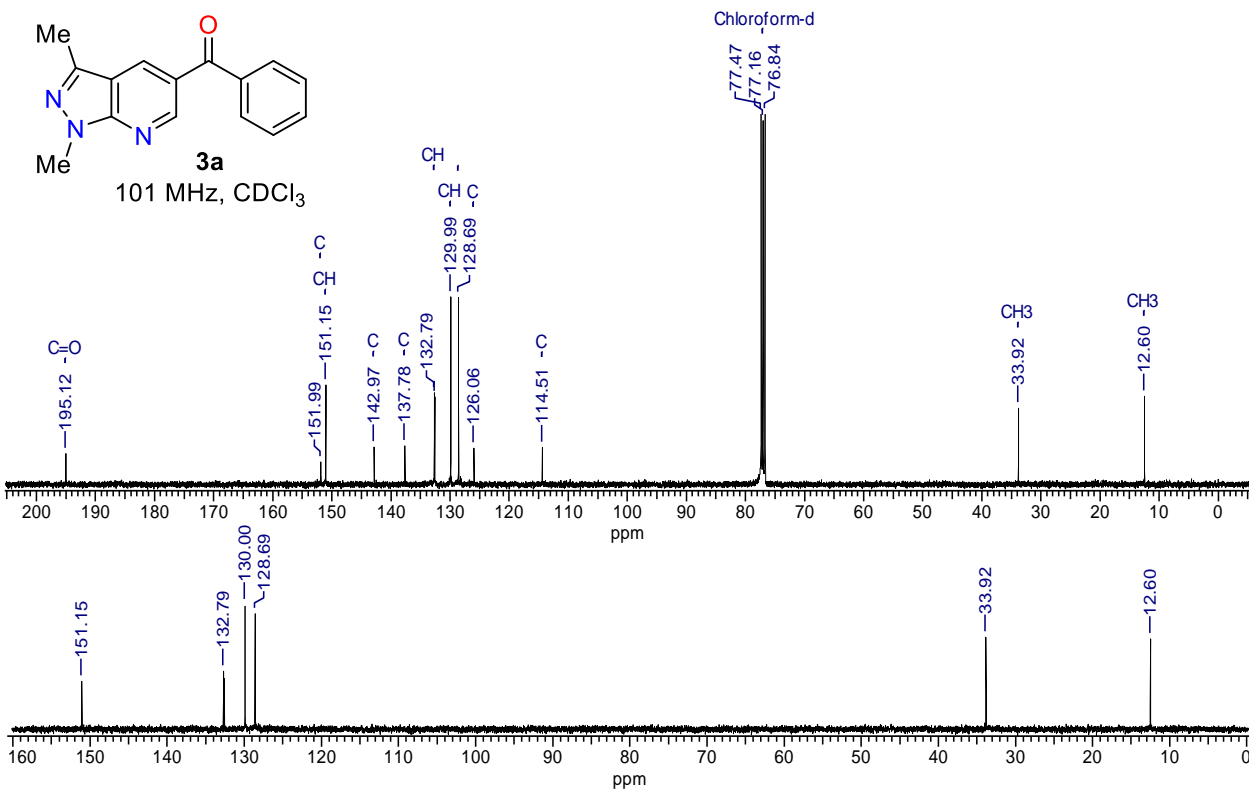

Fig. S38 <sup>1</sup>H, <sup>13</sup>C, and DEPT-135 spectra of 5-benzoyl-N-methyl derivative **3a**

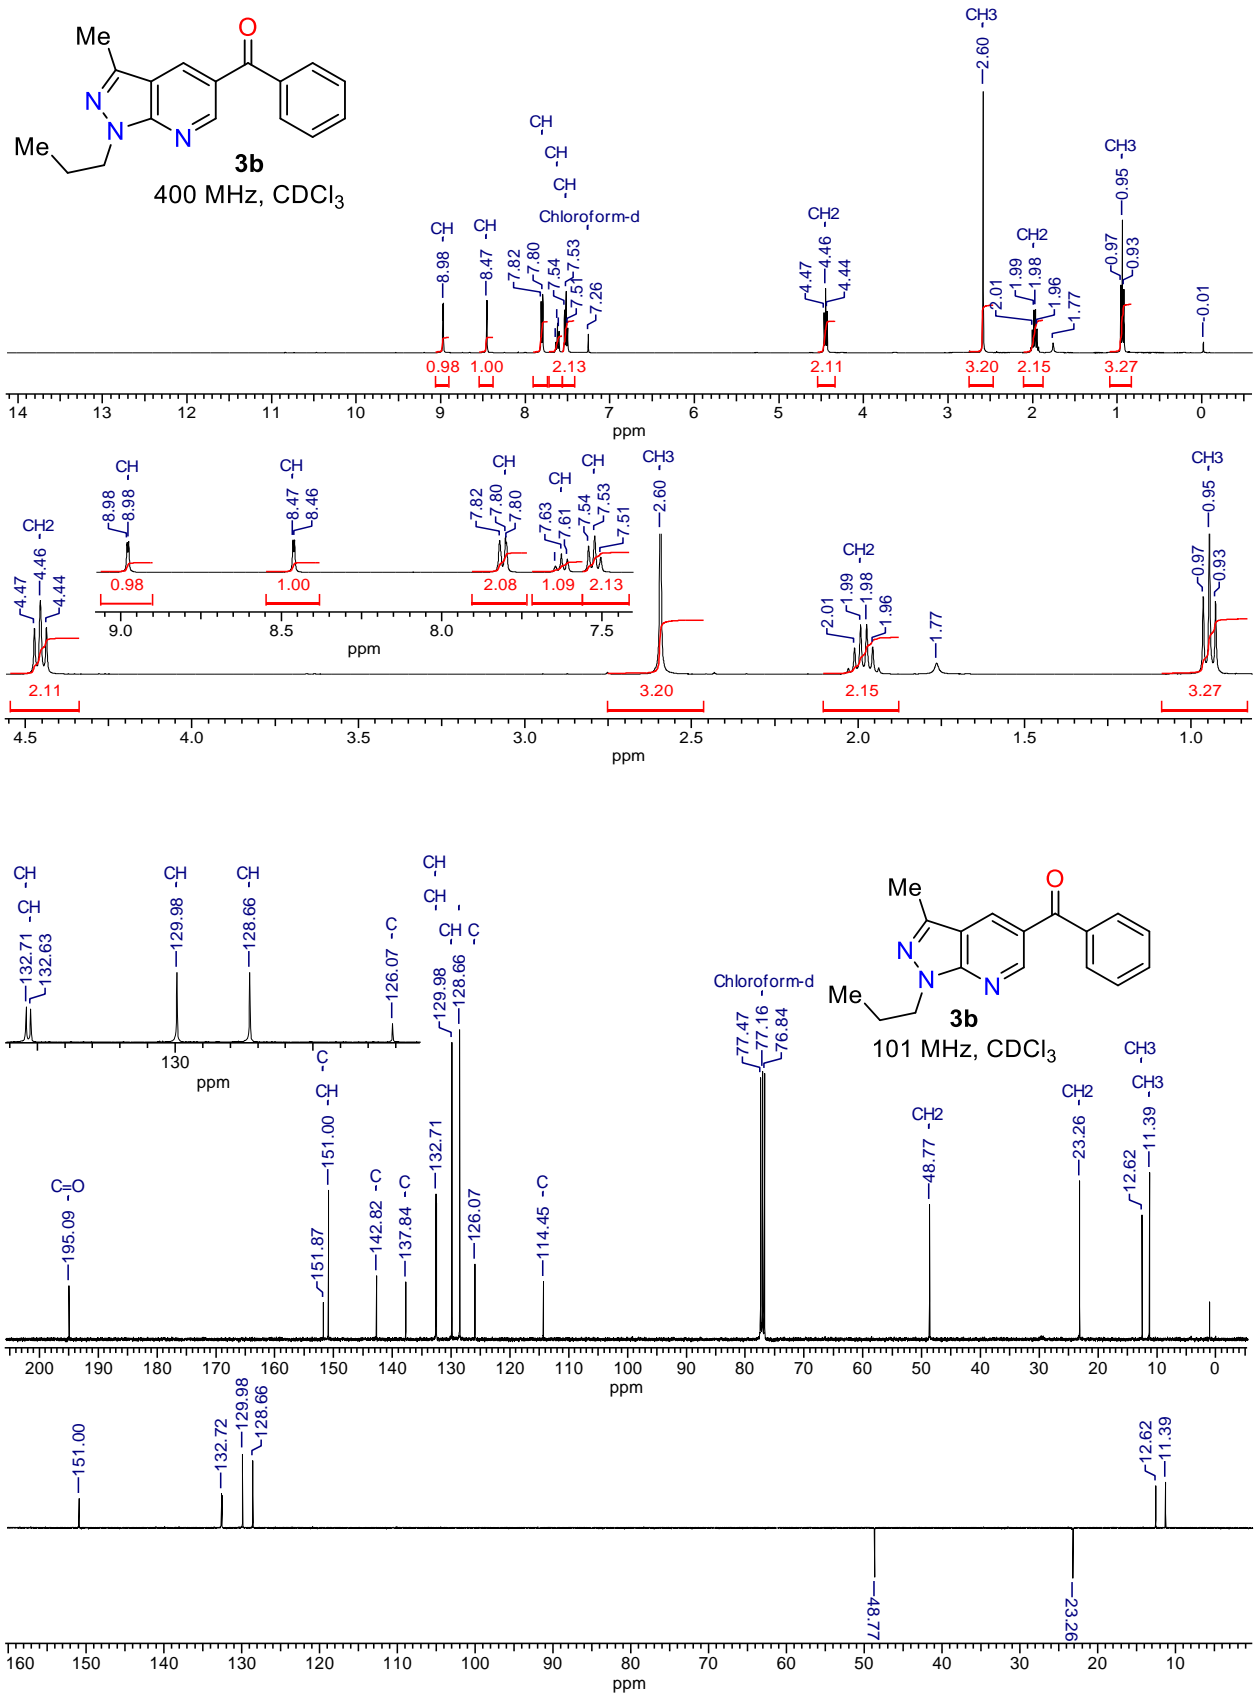

Fig. S39 <sup>1</sup>H, <sup>13</sup>C, and DEPT-135 spectra of 5-benzoyl-*N*-propyl derivative **3b**

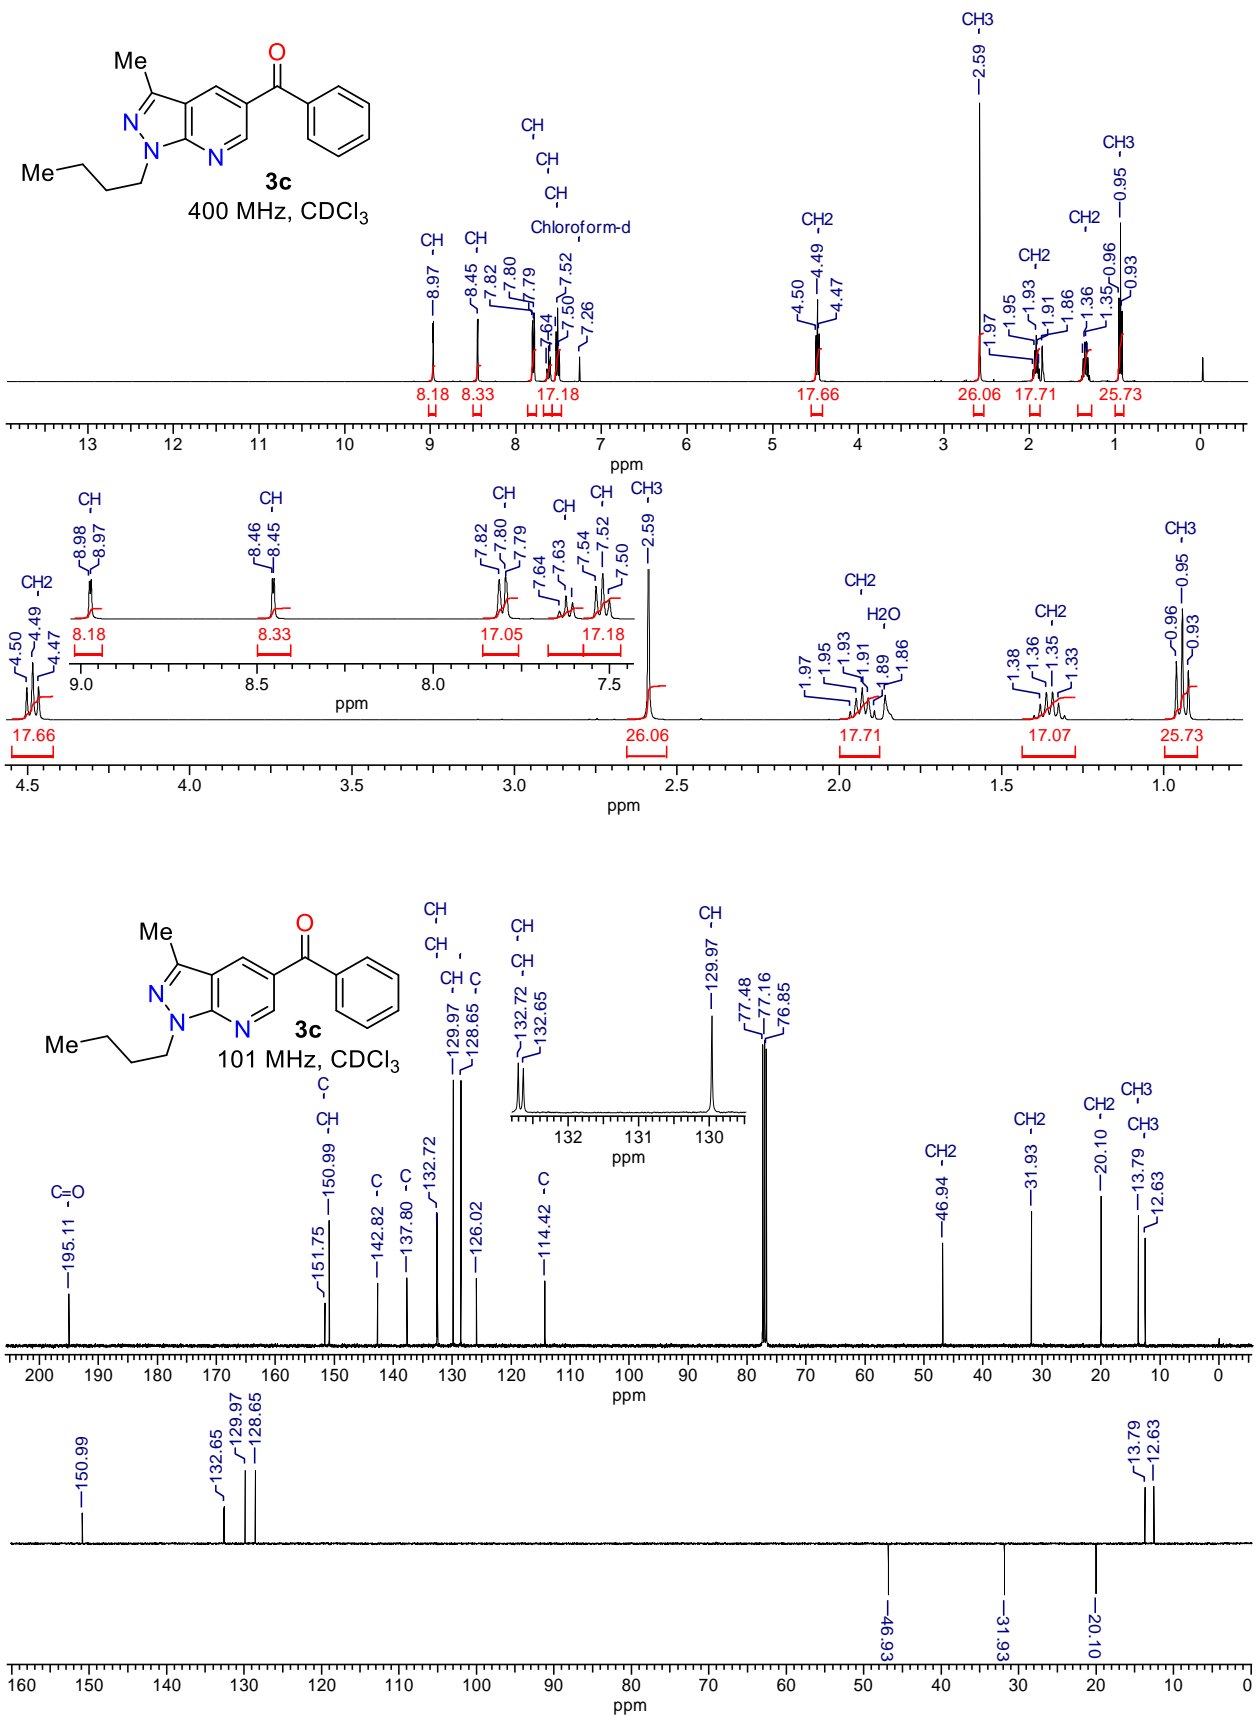

**Fig. S40** <sup>1</sup>H, <sup>13</sup>C, and DEPT-135 spectra of 5-benzoyl-N-butyl derivative **3c**



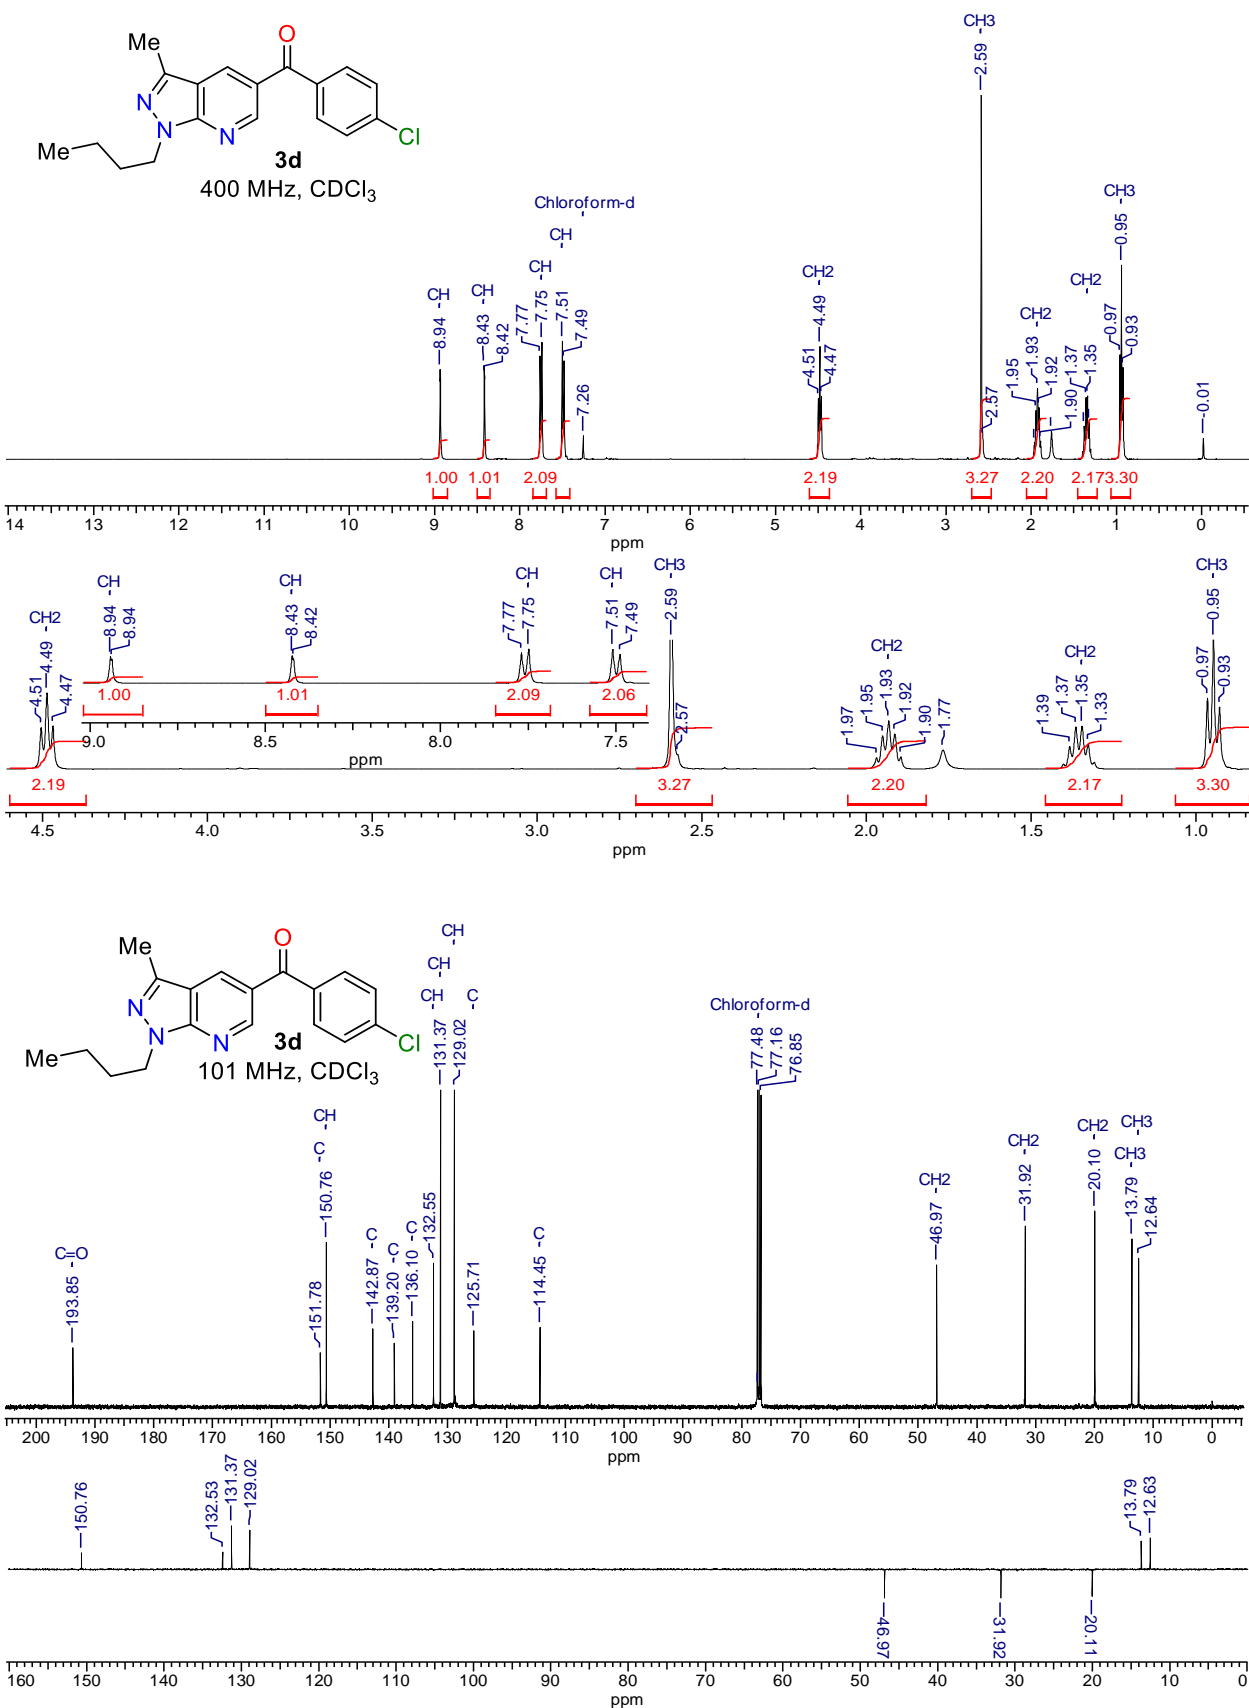

Fig. S41 <sup>1</sup>H, <sup>13</sup>C, and DEPT-135 spectra of 5-(4-chlorobenzoyl)-*N*-butyl derivative **3d**

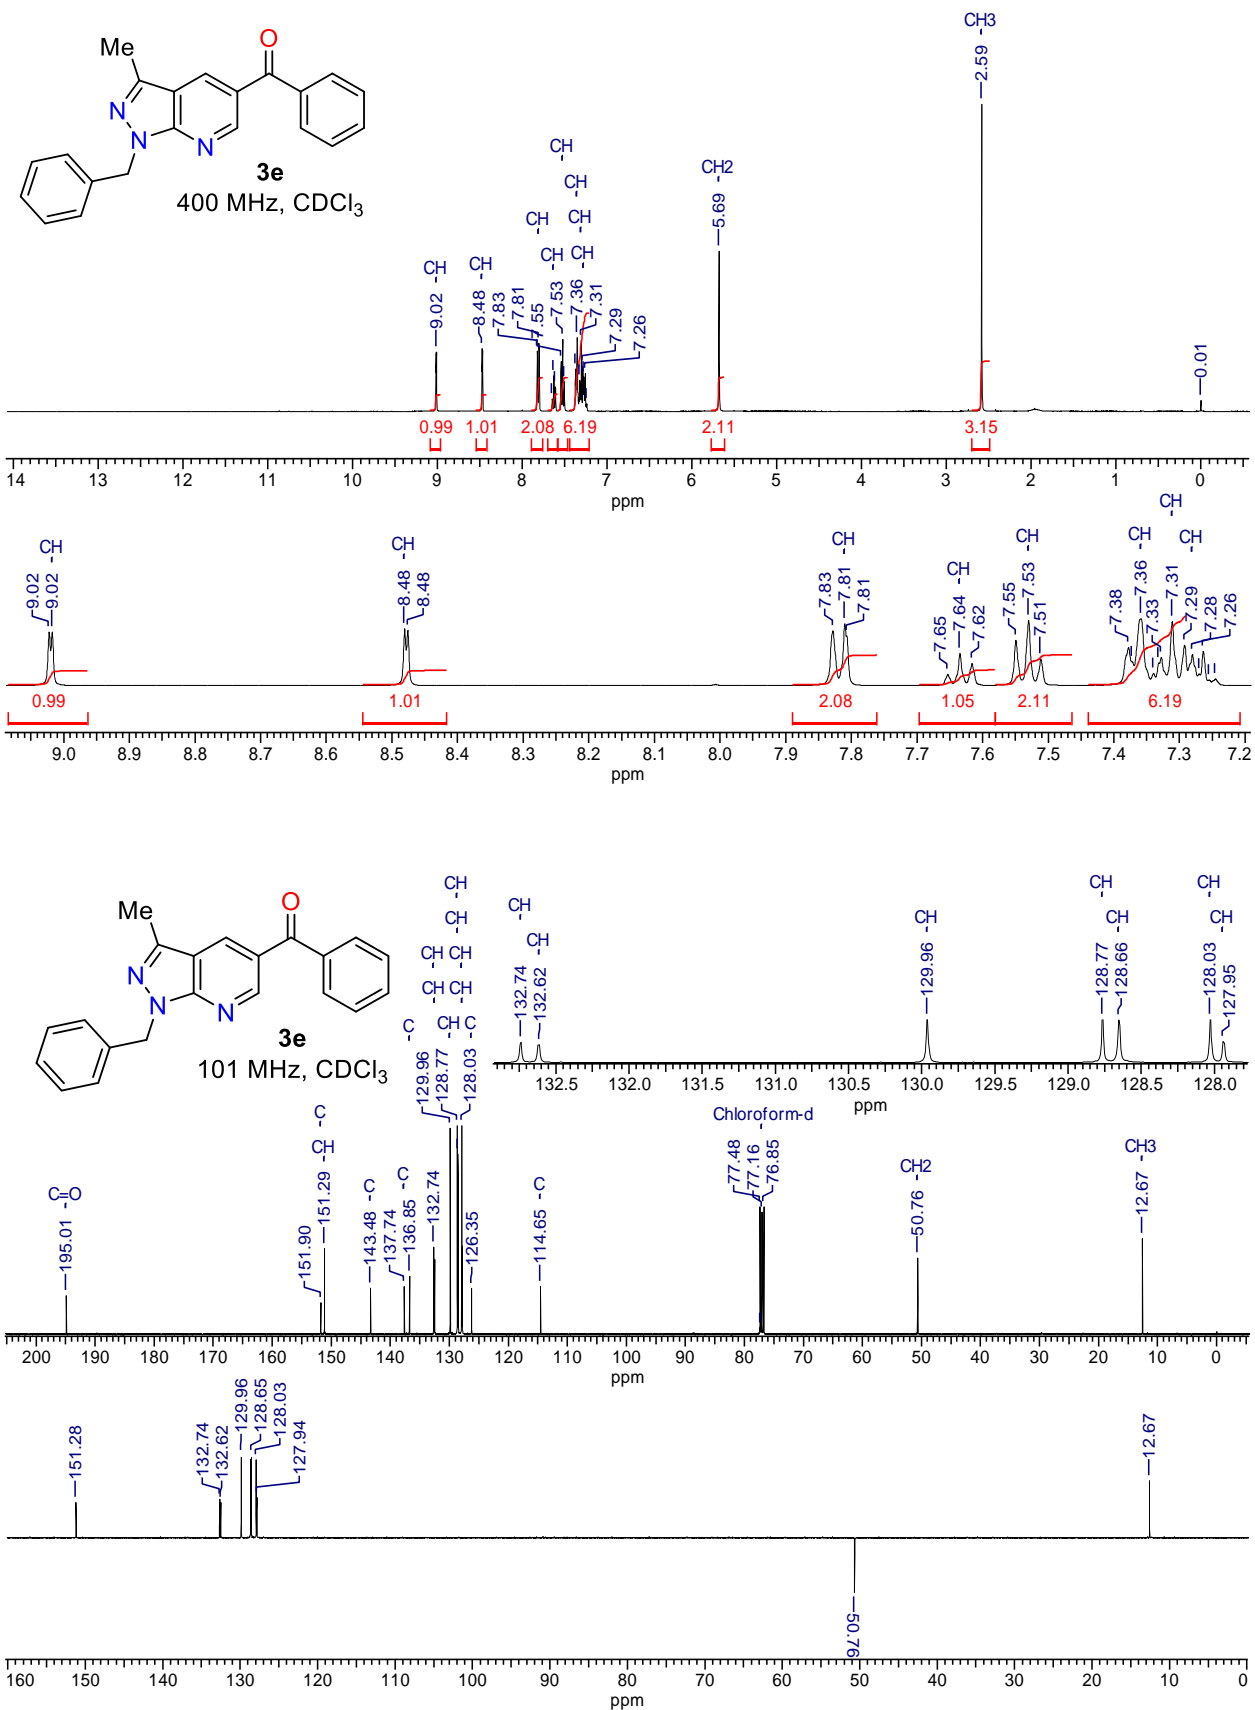

**Fig. S42** <sup>1</sup>H, <sup>13</sup>C, and DEPT-135 spectra of 5-benzoyl-N-benzyl derivative **3e**

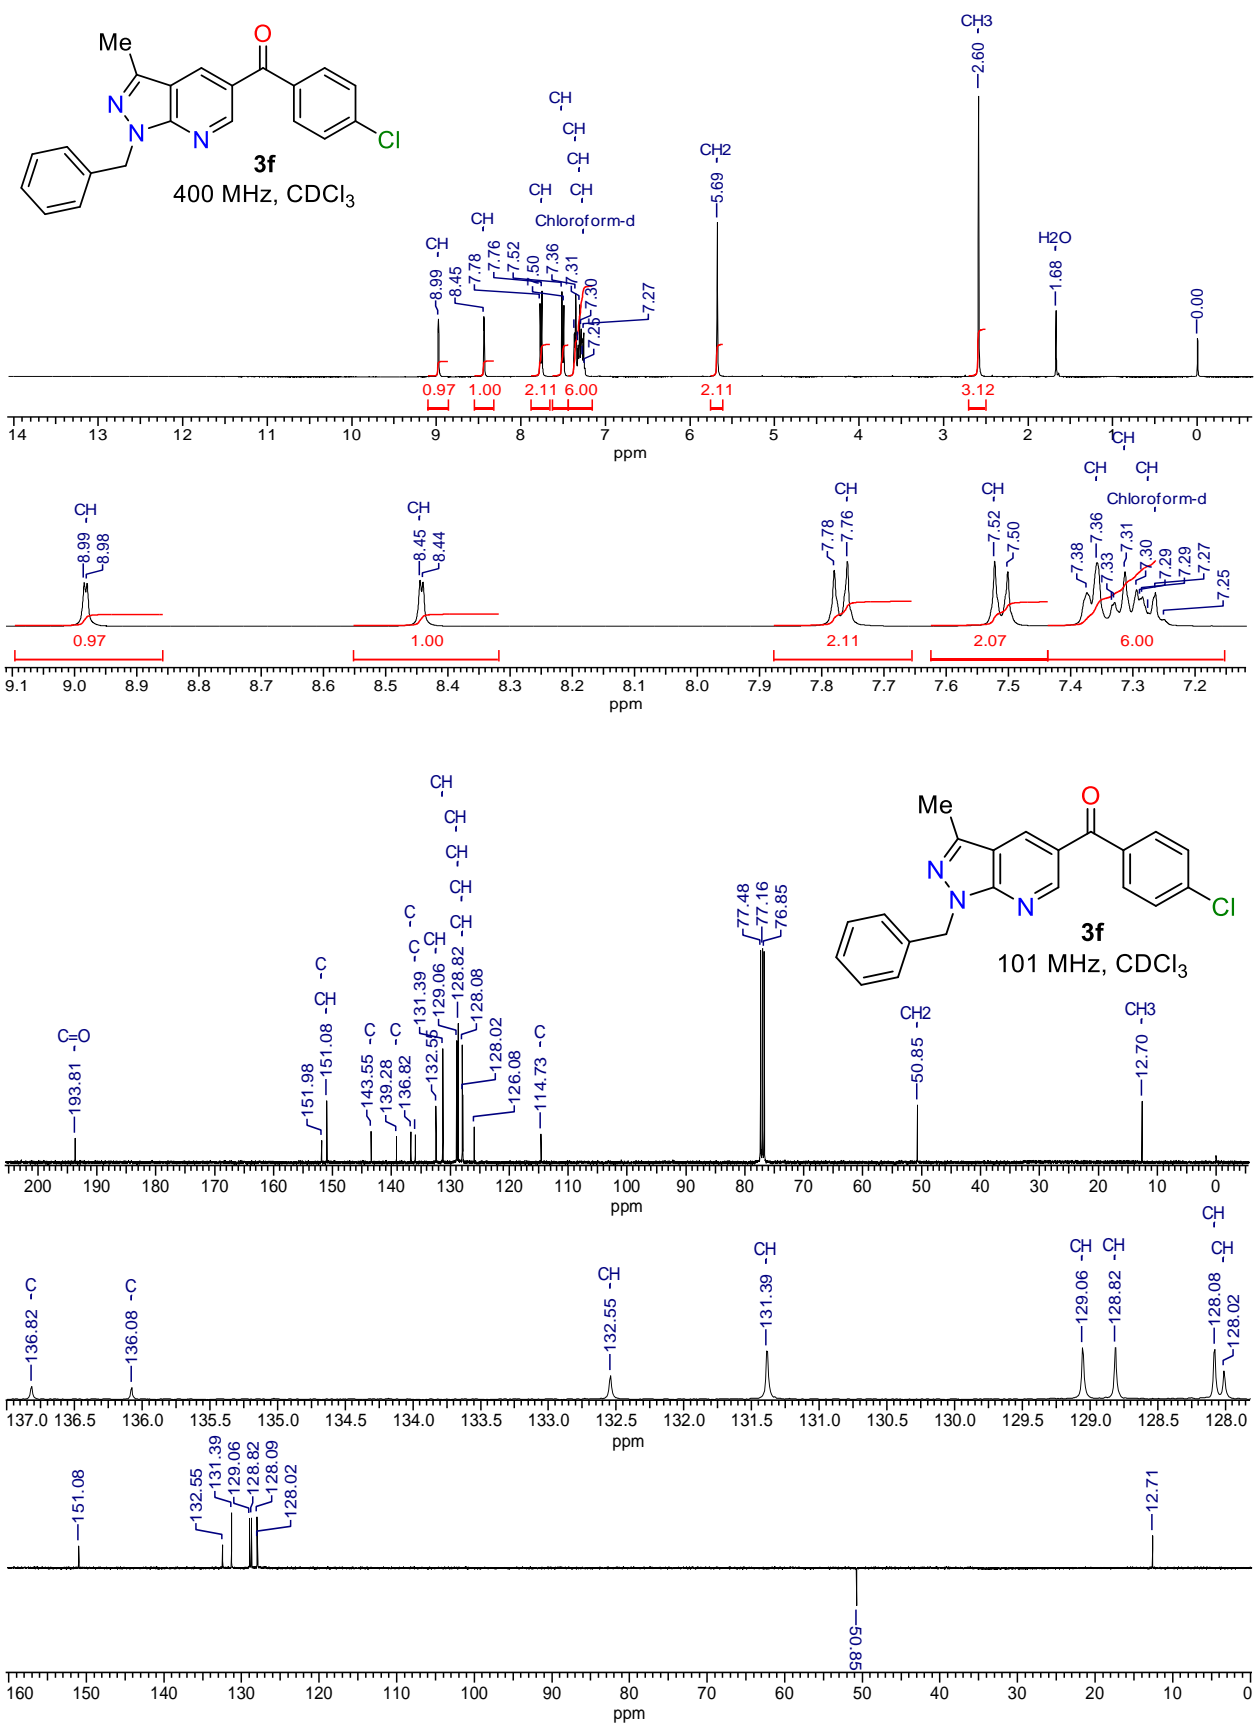

**Fig. S43** <sup>1</sup>H, <sup>13</sup>C, and DEPT-135 spectra of 5-(4-chlorobenzoyl)-N-benzyl derivative **3f**

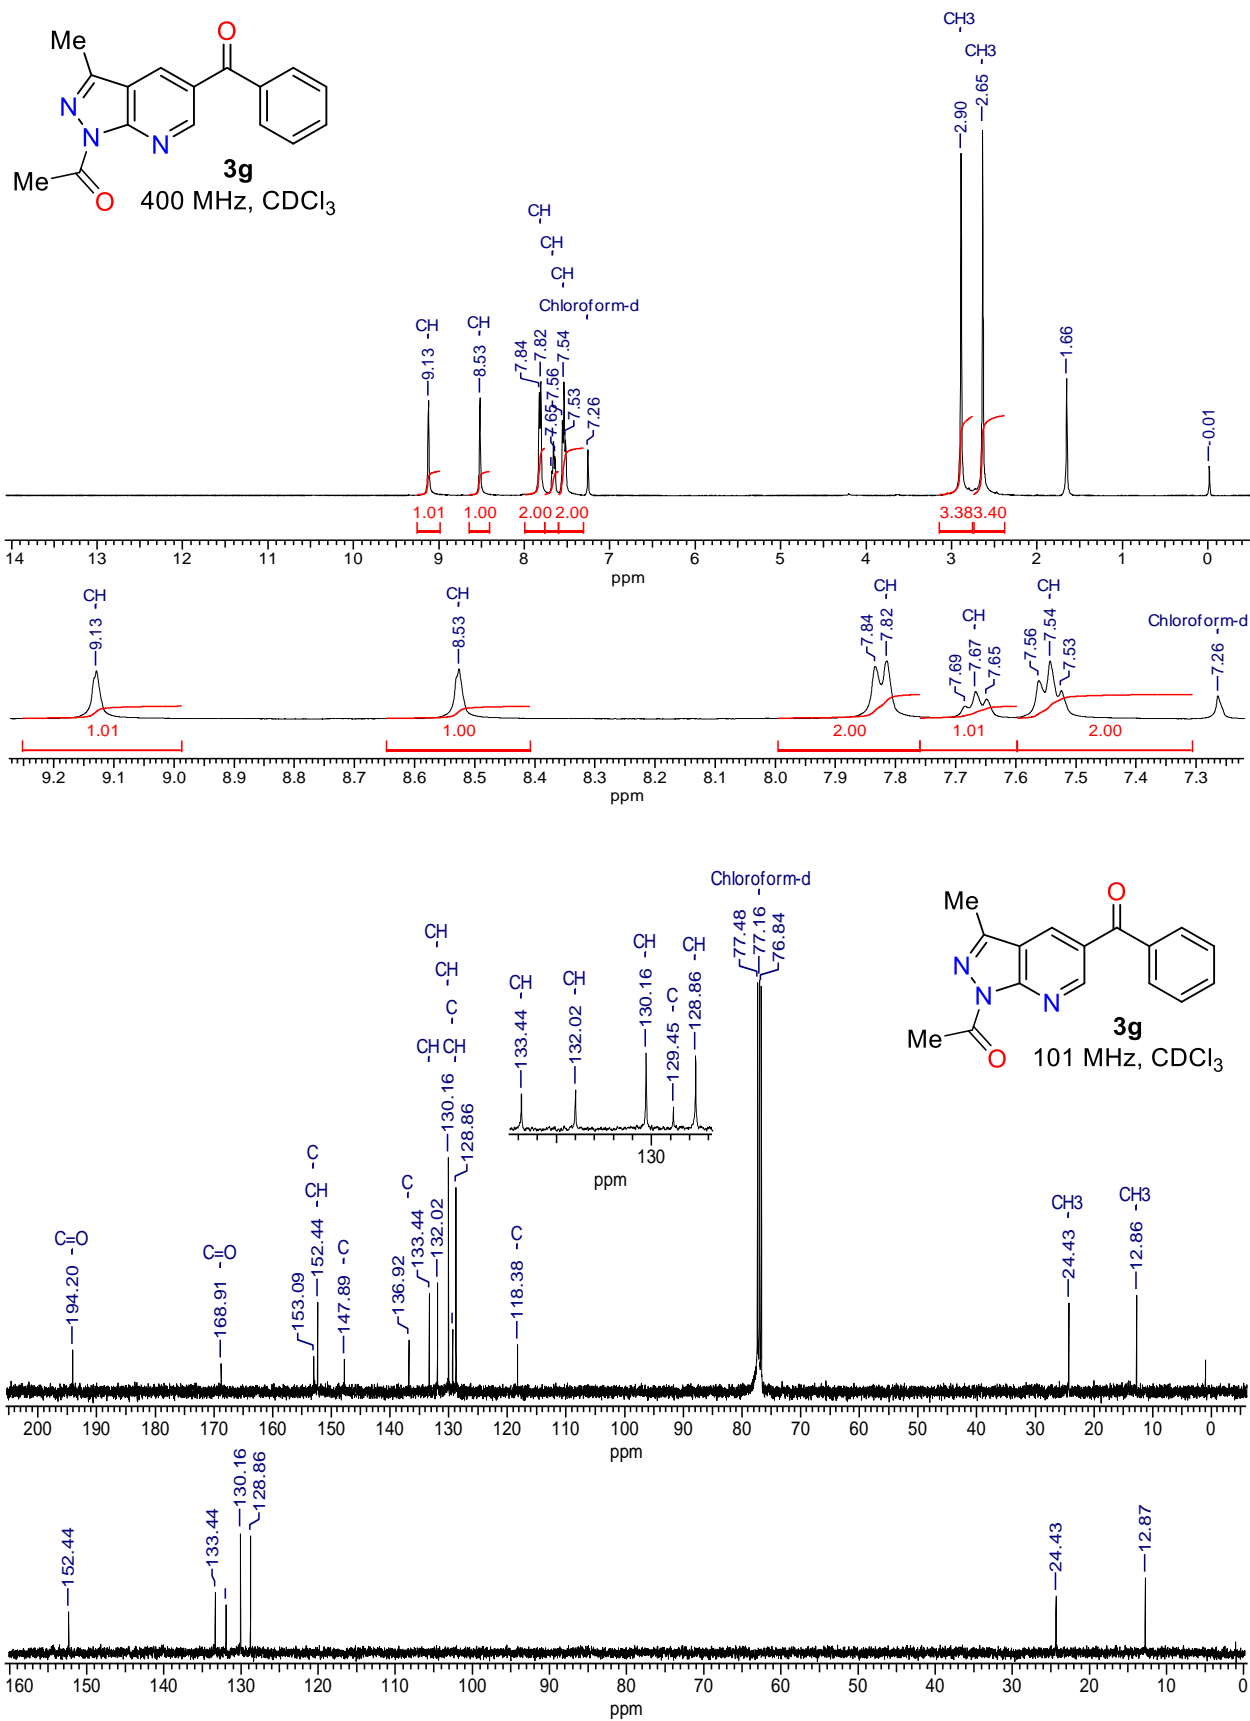

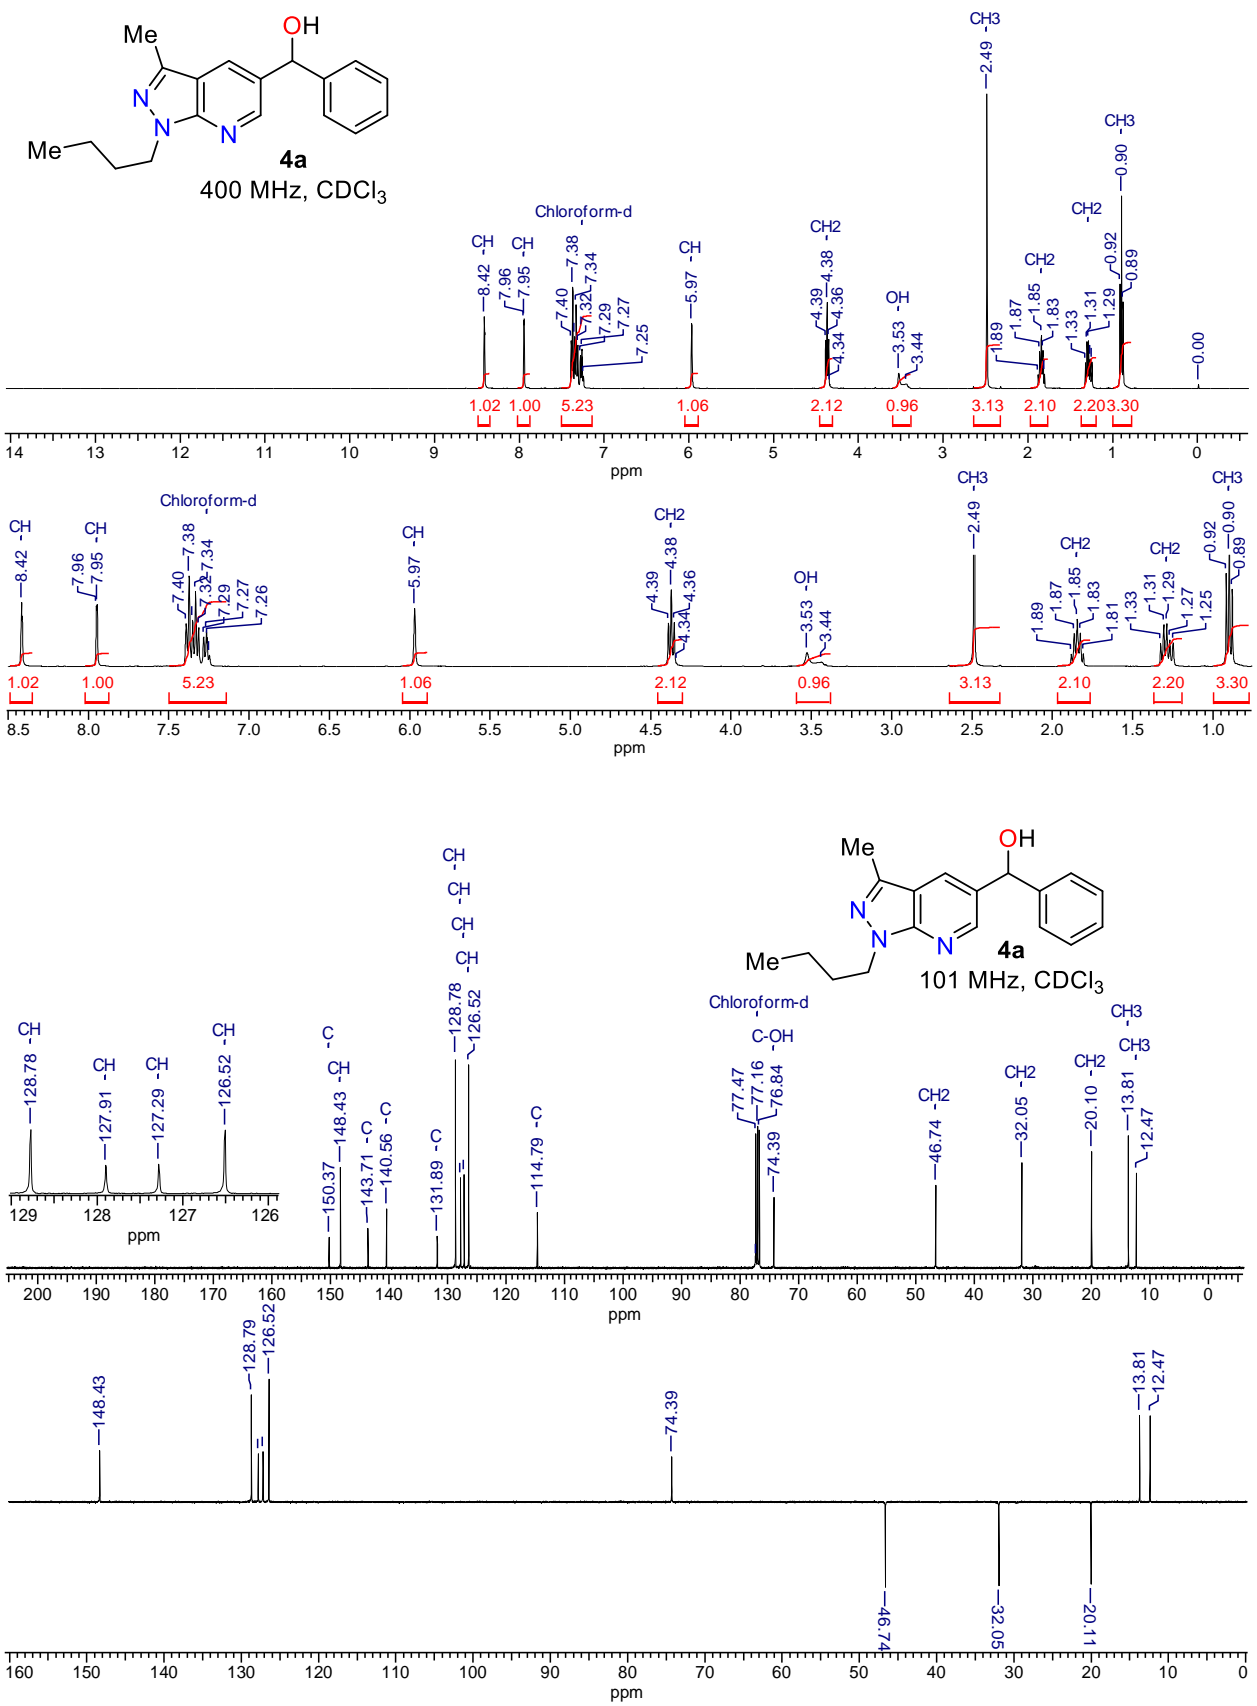

Fig. S45 <sup>1</sup>H, <sup>13</sup>C, and DEPT-135 spectra of the hetaryl phenyl methanol **4a**

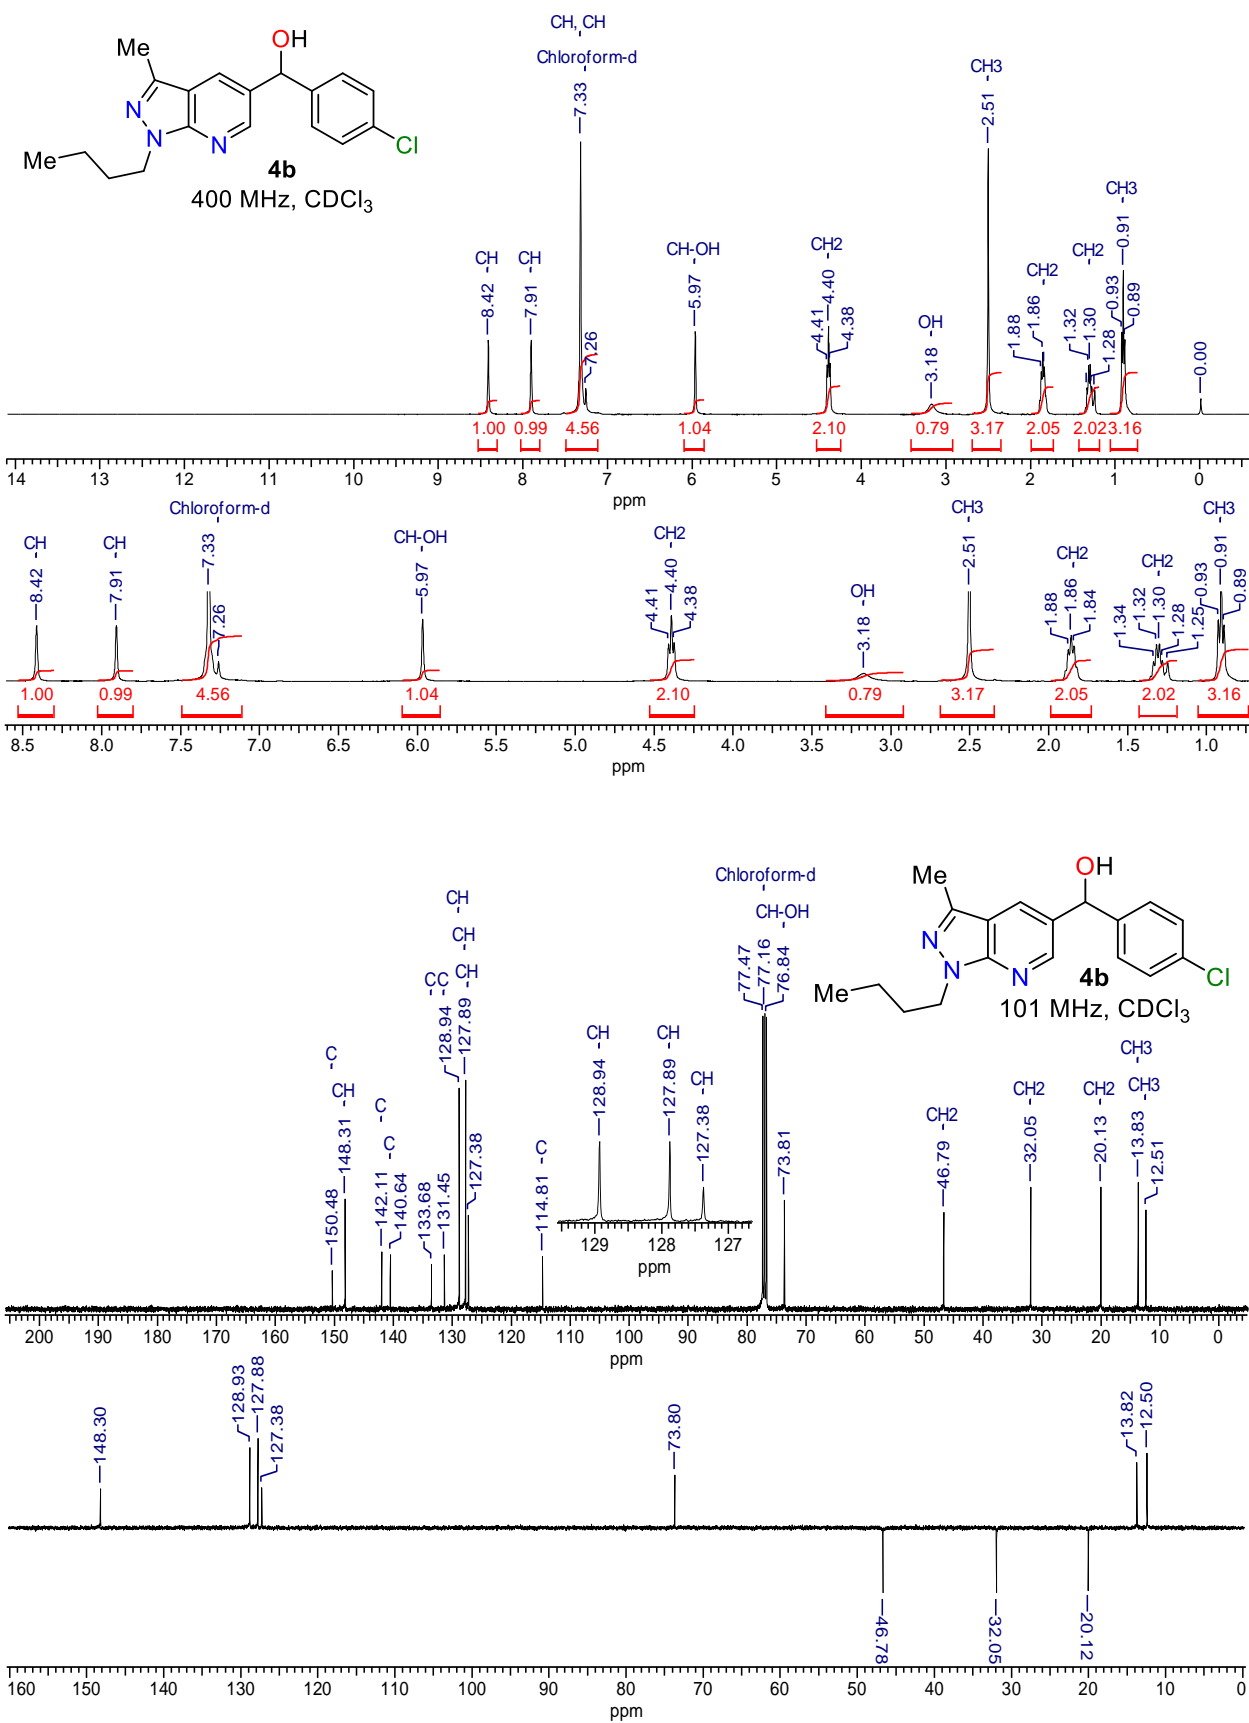

**Fig. S46** <sup>1</sup>H, <sup>13</sup>C, and DEPT-135 spectra of the 4-chlorophenyl hetaryl methanol **4b**

## 6. Crystallographic and photophysical details

The X-ray intensity data were measured at 25(2) °C using CuK $\alpha$  radiation ( $\lambda = 1.54184$  Å), by  $\omega$  scans in an Agilent SuperNova, Dual, Cu at Zero, Atlas four-circle diffractometer equipped with a CCD plate detector. The collected frames were integrated with the CrysAlis PRO software package (CrysAlisPro 1.171.39.46e, Rigaku Oxford Diffraction, 2018). Data were corrected for the absorption effect using the CrysAlis PRO software package by the empirical absorption correction using spherical harmonics, implemented in the SCALE3 ABSPACK scaling algorithm. Crystal data, data collection, and structure refinement details are summarized in Table S1. H atoms were placed in calculated positions (C—H = 0.93 - 0.98 Å) and included as riding contributions, with isotropic displacement parameters set at 1.2–1.5 times the  $U_{eq}$  value of the parent atom. H atoms belonging to NH groups were in different density maps and were refined freely. The crystal structures were solved using an iterative algorithm<sup>5</sup> and subsequently completed by a different Fourier map and refined using the program SHELXL2014.<sup>6</sup> Mercury software generated Molecular and supramolecular graphics (Figures S47 and S48).<sup>7</sup>

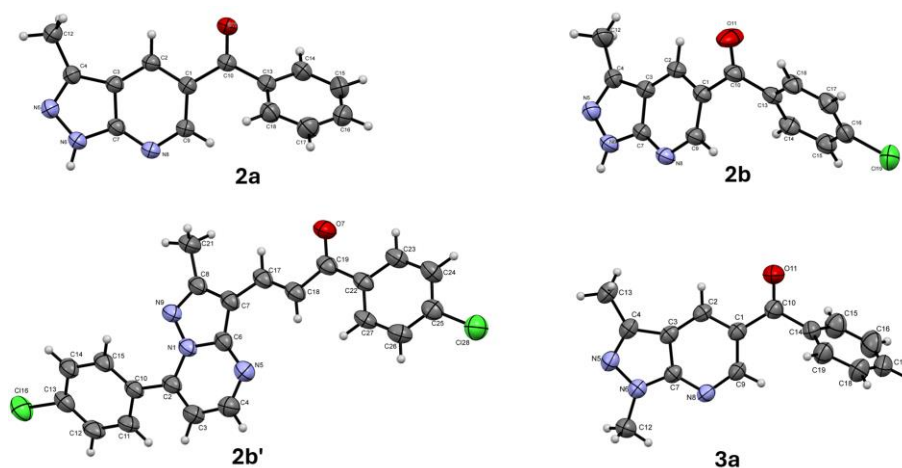

Fig. S47 Molecular structures of 2a, 2b, 2b', and 3a obtained by X-ray diffraction data

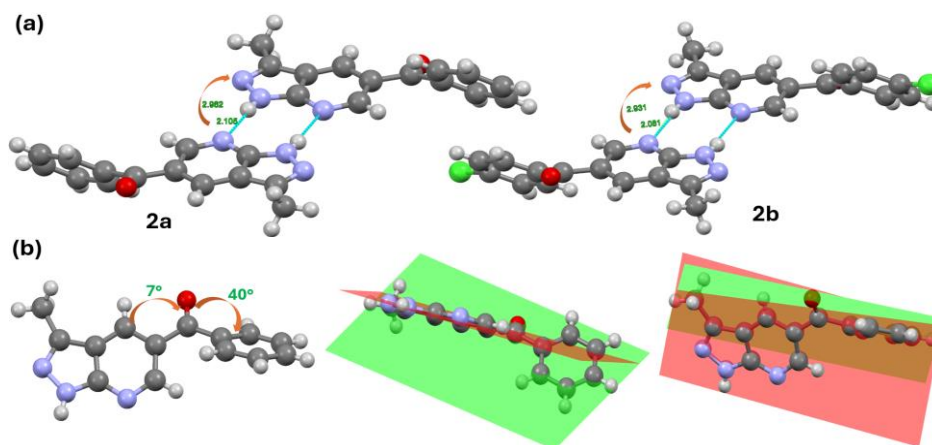

Fig. S48 (a) Hydrogen interactions (C-H...O) connect molecules in the crystal of NH-pyrazolo[3,4-b]pyridines 2a-b and (b) dihedral angles between the planes of the heterocyclic nucleus and the aryl group for 2a.

The fluorescence quantum yields ( $\phi_f$ ) were determined using Prodan<sup>®</sup> as a reference standard and according to equation S1.

$$\phi_{f,x} = \phi_{f,st} \frac{F_x A_{st} n_x^2}{F_{st} A_x n_{st}^2} \quad \text{Eq S1.}$$

$F$  is the integral photon flux,  $A$  is the absorption factor,  $n$  is the refractive index of the solvent and  $\phi_f$  is the quantum yield. The index  $x$  denotes the sample, and the index  $st$  denotes the standard.<sup>8</sup>

*Lippert-Mataga correlation:* The sensitivity to medium polarity is often interpreted in terms of the Lippert-Mataga equation (Eq S2).

$$\nu_{abs} - \nu_{em} = \frac{2(\mu_e - \mu_g)\Delta f}{hca^3} \quad \Delta f = \frac{(\epsilon - 1)}{(2\epsilon + 1)} - \frac{(n^2 - 1)}{(2n^2 + 1)} \quad \text{Eq S2.}$$

$\Delta\mu$  are the Stokes shift derived from the difference between the wavenumbers of absorption and emission maxima,  $\mu_g$  and  $\mu_e$  are the ground state and excited state dipole moments, respectively. Likewise,  $\epsilon$  is the solvent dielectric constant,  $n$  is the refractive index,  $h$  is Planck's constant,  $c$  is the light velocity, and  $a$  is Onsager cavity radius.<sup>9</sup>

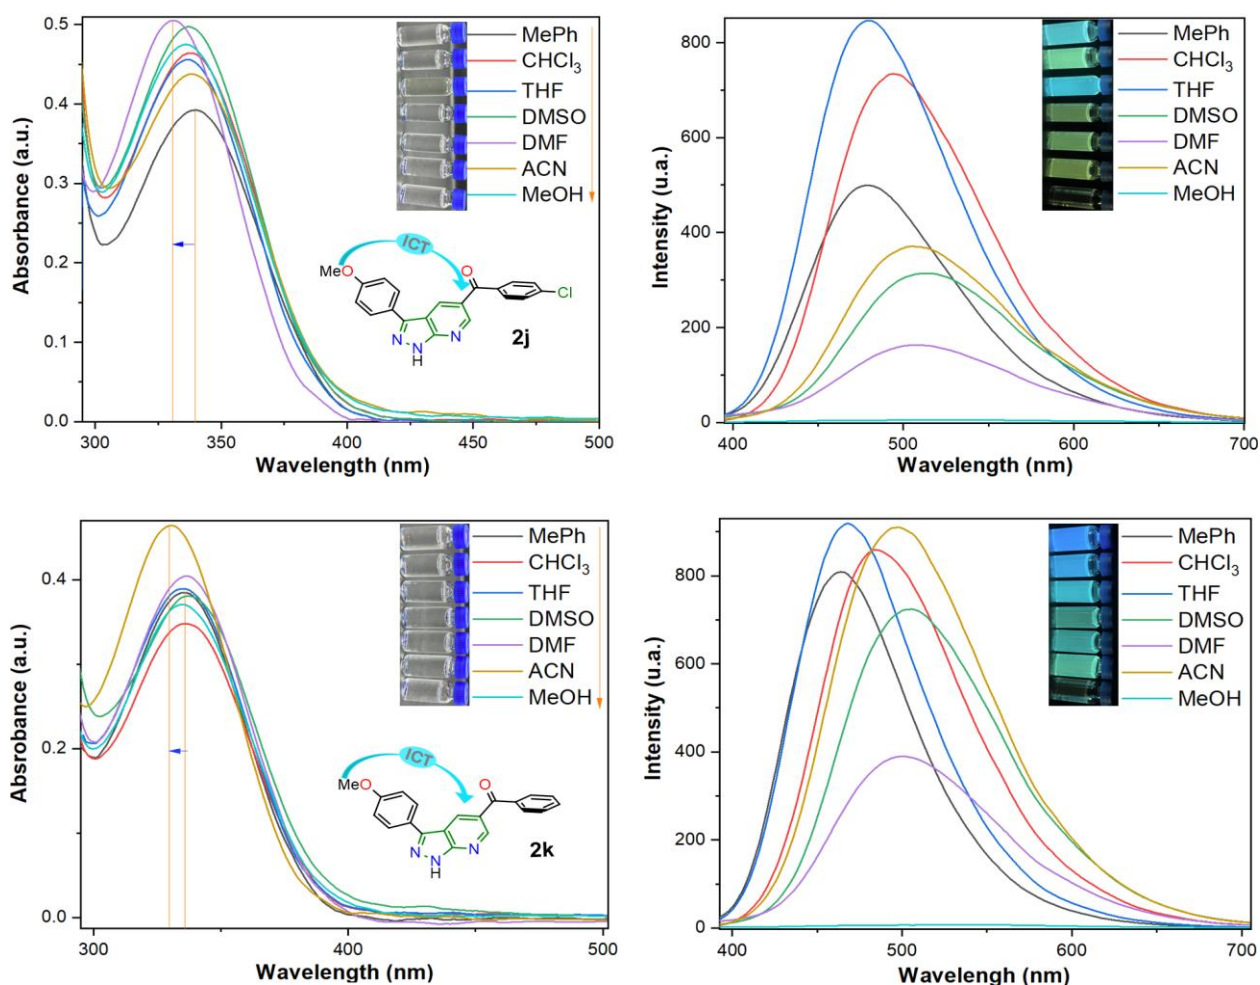

Fig. S49 UV-vis (left) and emission (right,  $\lambda_{ex} = 335$  nm) spectra of **2j-2k** in different solvents (50  $\mu$ M) at 20  $^{\circ}$ C.



## 7. Computational studies

All calculations were performed using the software Gaussian 16<sup>10</sup> with the B3LYP functional.<sup>11</sup> The basis set 6-311G +(d,p) was used for all atoms. The geometries of all critical points on the Potential Energy Surface (PES) were optimized using the gradient method available in Gaussian 16. Vibrational frequency analyses were carried out to characterize all critical points as minima or transition states. An aqueous medium was used as an implicit solvent model (dielectric constant  $\epsilon = 78.39$ ). Molecular graphics and orbital visualizations were generated with GaussView6.<sup>12</sup>

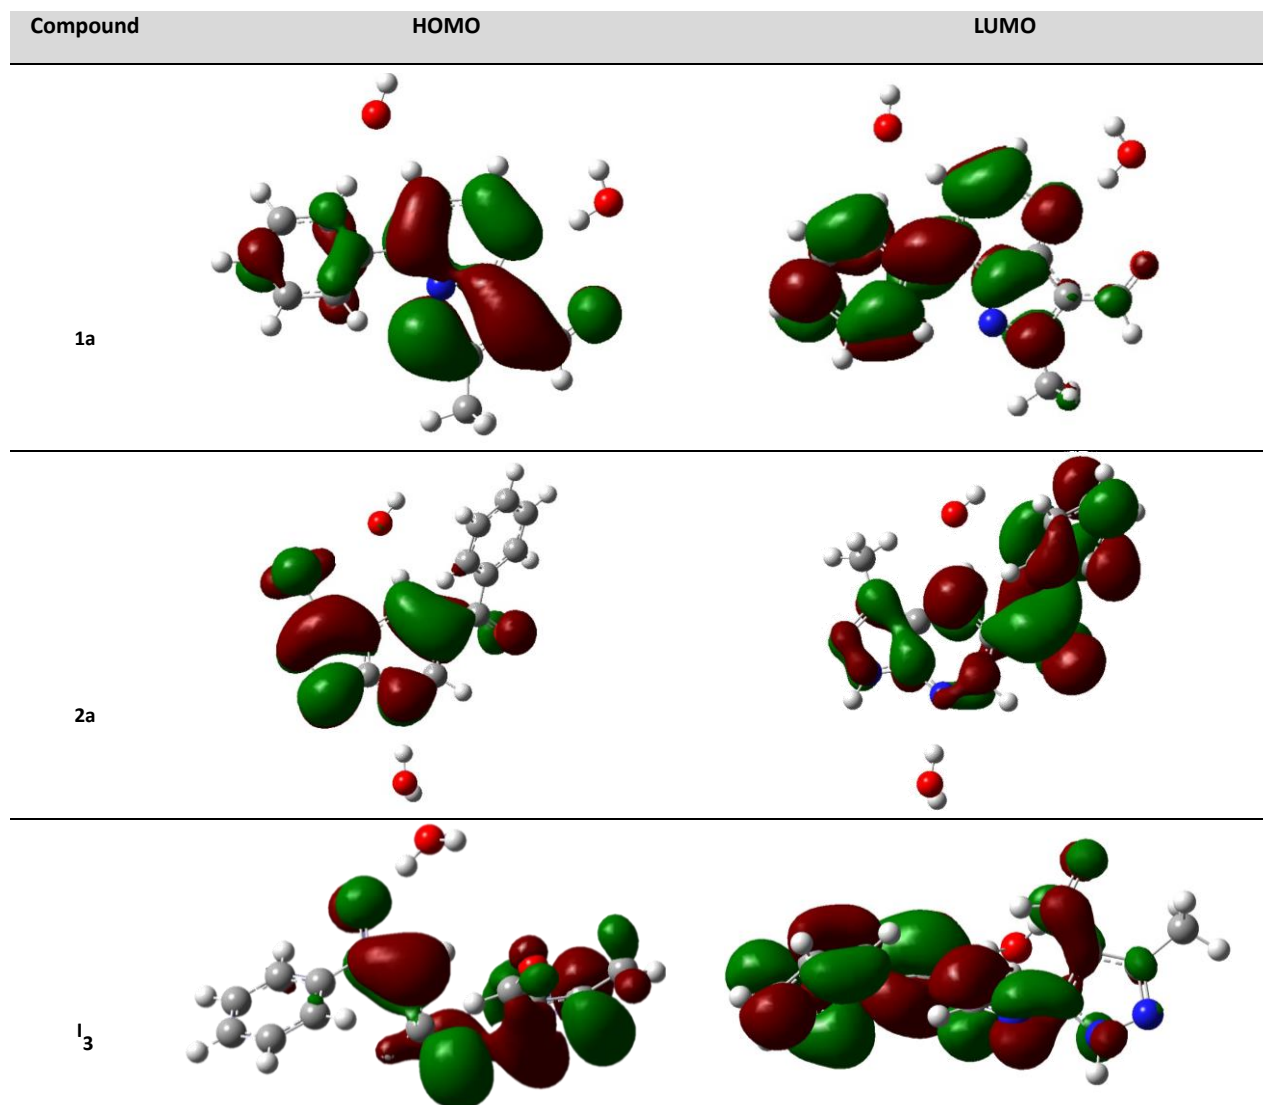

Fig. S50 Estimation of HOMO and LUMO of substrate **1a**, product **2a**, and intermediate **I<sub>3</sub>**.

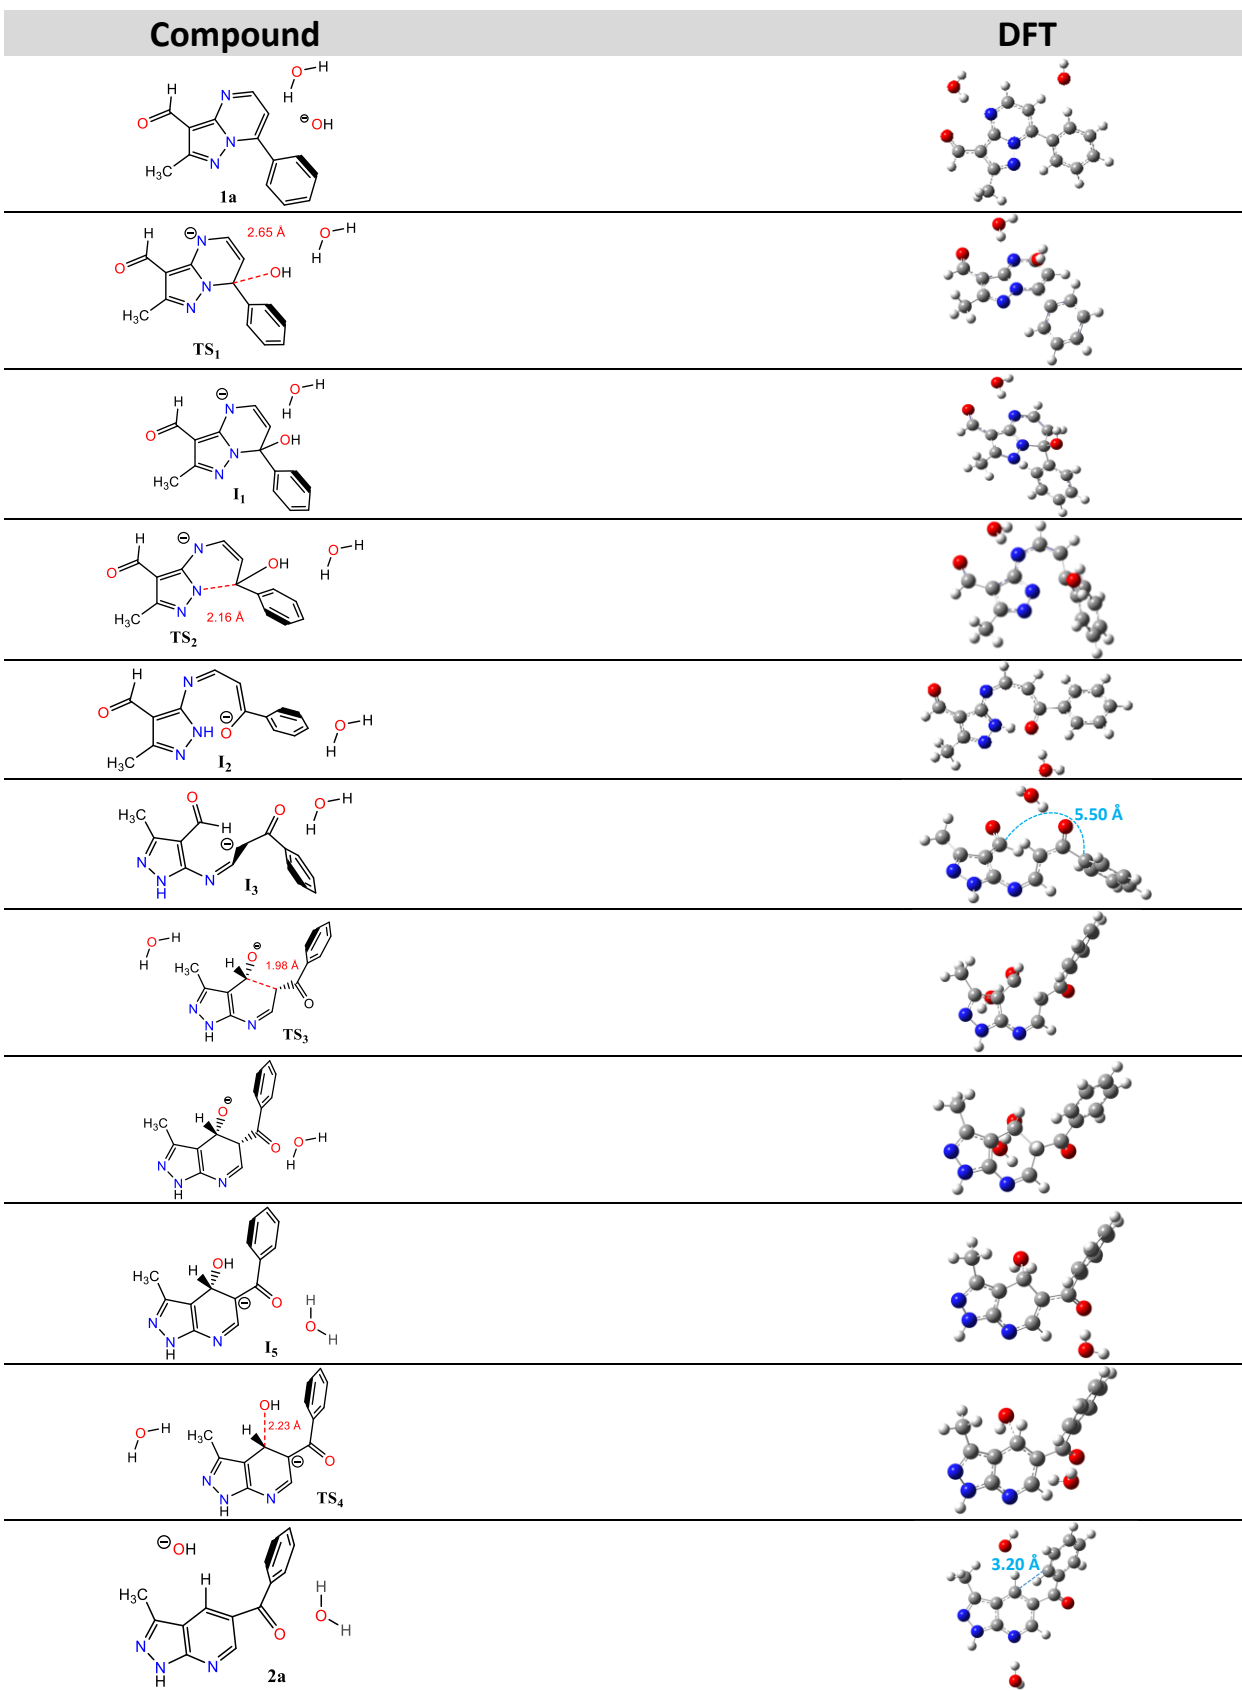

**Figure S51.** Structure for compounds **1a**, **2a**, intermediate **I<sub>1</sub>** to **I<sub>5</sub>** and transition states **TS<sub>1</sub>** to **TS<sub>4</sub>**

## Cartesian coordinates of all the discussed critical points

**Structure 1a**  
Charge:-1, Spin: 1, Energy: -932.224628 Hartree  
C -1.60280400 0.04995100 -0.01044400  
C -0.79036300 2.15748800 -0.13786600  
C 0.53728300 1.71405000 -0.11328700  
C 0.80719000 0.35346300 -0.05583000  
C -1.56791500 -2.18430500 0.21453900  
C -2.44960600 -1.07430800 0.10769500  
H -0.98965000 3.22292800 -0.19693100  
H 1.34259100 2.45499900 -0.11119000  
N -1.85400600 1.35992700 -0.10571800  
N -0.30034100 -0.45849800 0.01629500  
N -0.29158400 -1.82177600 0.16058800  
C 2.18167600 -0.18813700 -0.07593500  
C 2.49819300 -1.45648500 -0.59580200  
C 3.22691500 0.63442900 0.38750800  
C 3.81975100 -1.89119900 -0.63807600  
H 1.71434600 -2.09806900 -0.96668000  
C 4.54236700 0.18169500 0.35582100  
H 3.02300800 1.63859000 0.74678500  
C 4.84579500 -1.08124500 -0.15283700  
H 4.04565600 -2.86810900 -1.04994100  
H 5.33438700 0.82340300 0.72501600  
H 5.87266800 -1.42817600 -0.17764300  
C -1.91624400 -3.62972800 0.37669900  
H -2.50101700 -3.99113000 -0.47307400  
H -1.00495100 -4.22344900 0.44858700  
H -2.51028700 -3.79226400 1.27944900  
C -3.88757200 -1.12693500 0.13745100  
H -4.30247400 -2.14641700 0.24871700  
O -4.65192400 -0.17008700 0.05195800  
O 2.73555300 3.78974300 0.42675500  
H 2.67382500 4.74482200 0.54326600  
H -3.61154800 2.33390100 -0.28711400  
O 4.28885400 3.02904500 -0.40649100  
H -3.79123600 3.82938400 -0.60299600

**Structure TS<sub>1</sub>**  
Charge:-1, Spin: 1, Energy: -932.213951 Hartree  
C 1.48650800 -0.06545000 -0.15973300  
C 0.94386800 -2.24572500 -0.45314700  
C -0.41908300 -1.97005800 -0.35693200  
C -0.85266600 -0.67161000 -0.13019600  
C 1.16409400 2.13100300 0.19471000  
C 2.18325800 1.15473800 0.00289600  
H 1.27366600 -3.26473300 -0.62855300  
H -1.14460400 -2.76180800 -0.46945300  
N 1.89963500 -1.32160400 -0.35873400  
N 0.13582500 0.26685500 -0.07252900  
N -0.05319200 1.60538200 0.15344800  
C -2.28202600 -0.29704200 -0.17940800  
C -2.72844100 0.79890000 -0.93226800  
C -3.22685800 -1.12226500 0.44749000  
C -4.09179300 1.06136800 -1.05055900  
H -2.01425100 1.44057800 -1.42898700  
C -4.58678700 -0.85170900 0.33257600  
H -2.88261900 -1.95076300 1.05150200  
C -5.02463700 0.24151700 -0.41696800  
H -4.42318400 1.90826600 -1.64050000  
H -5.30502500 -1.49042100 0.83393100  
H -6.08434900 0.45238800 -0.50553000  
C 1.32634900 3.60038800 0.42272900  
H 1.83699500 4.07550900 -0.41889000  
H 0.34783000 4.06567600 0.54269700  
H 1.91804600 3.79669700 1.32041000  
C 3.59788000 1.40264400 -0.02331100  
H 3.87579700 2.46172300 0.13719500  
O 4.48276800 0.56879800 -0.20497100  
O -0.61290400 -1.02602800 2.48370600  
H -1.09861800 -0.78879700 3.28360300  
H 3.74085400 -2.07903700 -0.41861900  
O 4.50710600 -2.68664800 -0.46765300  
H 4.12983000 -3.56888100 -0.39002000

**Structure I<sub>1</sub>**  
Charge:-1, Spin: 1, Energy: -932.240727 Hartree  
C 1.44468800 -0.11561300 0.09823400  
C 0.83614800 -2.30363800 0.13525800  
C -0.44346400 -2.04123200 0.50087400  
C -0.91547400 -0.65389000 0.82793500  
C 1.17483600 2.13676600 0.24385100  
C 2.15133500 1.12430600 -0.04001500  
H 1.12649500 -3.33737300 -0.03760300  
H -1.16731700 -2.83894200 0.60945300  
N 1.83455100 -1.38177600 -0.06300700  
N 0.15834300 0.24858400 0.43057000  
N -0.00116100 1.62232800 0.53059300  
C -2.22605600 -0.30006600 0.11227500  
C -2.21143600 -0.09518800 -1.27250000  
C -3.44675100 -0.24598200 0.78825000  
C -3.38972900 0.16641800 -1.96605000  
H -1.27054200 -0.13863000 -1.80942000  
C -4.63084200 0.01374400 0.09278700  
H -3.47038800 -0.40498200 1.85756300  
C -4.60766000 0.22167500 -1.28418500  
H -3.35884800 0.32665200 -3.03814000  
H -5.57060800 0.05376100 0.63275600  
H -5.52651400 0.42404000 -1.82306600  
C 1.36297500 3.62353100 0.24001900  
H 1.67409800 3.98468200 -0.74441900  
H 0.42513400 4.11357600 0.50569800  
H 2.12904600 3.93152200 0.95718300  
C 3.50819400 1.37184500 -0.38575500  
H 3.76896200 2.44887100 -0.42169100  
O 4.39303100 0.54199600 -0.64059900  
O -1.17320300 -0.52324500 2.24754100  
H -0.47509800 -1.01382000 2.69881300  
H 3.40845600 -2.20590300 -0.51659100  
O 4.14909400 -2.82812500 -0.73973100  
H 3.77303000 -3.70847600 -0.64119500

**Structure TS<sub>2</sub>**  
Charge:-1, Spin: 1, Energy: -932.192072 Hartree  
C -1.38810200 0.13674700 0.09264900  
C -0.52983300 2.05739100 1.04731600  
C 0.59788400 1.53703700 1.63538000  
C 1.24448000 0.26116100 1.34731300  
C -2.40396200 -0.82263400 -0.25900100  
H -0.75753500 3.09181100 1.30589400  
H 1.07025800 2.10682600 2.43085600  
N -0.46926800 -1.92396900 0.21015100  
N -1.47564200 1.48004800 0.26831800  
C 2.29465700 0.12549600 0.27887900  
C 2.70950800 1.24531500 -0.44805500  
C 2.89537000 -1.11499500 0.01475500  
C 3.70893300 1.13197300 -1.41418500  
H 2.24925500 2.20431700 -0.24662500  
C 3.89469000 -1.22631900 -0.94732600  
H 2.56165500 -2.01118500 0.52689000  
C 4.30639500 -0.10173000 -1.66493200  
H 4.02264700 2.01067700 -1.96619300  
H 4.34505200 -2.19251100 -1.14371500  
H 5.08458900 -0.18962300 -2.41439000  
C -1.73553200 -2.08681900 -0.14416700  
N -0.26120800 -0.57298700 0.30133900  
C -2.28789100 -3.45972300 -0.38808400  
H -3.15045300 -3.66878200 0.25159500  
H -2.61460500 -3.58733200 -1.42480000  
H -1.51886500 -4.20560300 -0.17912600  
C -3.78367000 -0.66364600 -0.56441300  
O -4.44283600 0.38467500 -0.63713100  
H -4.30641900 -1.62315800 -0.75732300  
O 1.47979600 -0.46746900 2.46704900  
H 2.18340300 -1.11543500 2.31857500  
H -2.42702900 2.71561600 -0.60165000  
O -2.83131800 3.50871000 -1.05203700  
H -2.08181500 4.05989200 -1.29848100

**Structure I<sub>2</sub>**

Charge:-1, Spin: 1, Energy: -932.243561 Hartree

C -2.21980600 -0.52792700 -0.06811500  
 C -0.49505700 -2.18545000 -0.38519100  
 C 0.82105300 -1.69353000 -0.17853500  
 C 1.44784900 -0.44027200 -0.34255600  
 C -3.56702700 1.19824100 0.51355100  
 C -3.59386500 -0.15884300 0.05967000  
 H -0.47145200 -3.27053400 -0.52293900  
 H 1.51546600 -2.50560100 0.00610200  
 N -2.32458100 1.63020000 0.64904100  
 N -1.52174300 0.56570500 0.32582200  
 N -1.74150400 -1.74761300 -0.42060300  
 C 2.91975600 -0.36134000 -0.03765900  
 C 3.73421100 0.47717300 -0.81212300  
 C 3.50406400 -1.07866200 1.01628700  
 C 5.09821600 0.58413800 -0.55160700  
 H 3.29236600 1.03421600 -1.62923000  
 C 4.86581400 -0.95937600 1.28796400  
 H 2.88895900 -1.71628800 1.64025300  
 C 5.66839300 -0.13156800 0.50224700  
 H 5.71631900 1.22572700 -1.16971700  
 H 5.29899800 -1.50949900 2.11581100  
 H 6.72860100 -0.04310300 0.71092300  
 O 0.89186000 0.61515100 -0.79265900  
 C -4.72053900 2.10142400 0.82681600  
 H -4.34683400 3.08275700 1.12266400  
 H -5.37644700 2.22920400 -0.03858300  
 H -5.33046200 1.70605200 1.64412400  
 C -4.79692600 -0.90652700 -0.16929500  
 H -5.71822000 -0.33042600 0.04931000  
 O -4.91316900 -2.06833300 -0.56437000  
 H -0.54192000 0.73245700 0.04604800  
 H 1.37743000 2.34199000 -0.74383000  
 O 1.49612800 3.31630700 -0.74988600  
 H 2.28661700 3.47511600 -0.22415900

**Structure I<sub>3</sub>**

Charge:-1, Spin: 1, Energy: -932.251523 Hartree

C 2.11136700 -1.05200800 -0.79395100  
 C 2.83896300 -0.55566900 0.32228900  
 C 2.34731600 -0.48951300 1.66667200  
 C -0.43615200 0.36466700 -0.31460700  
 C -0.23866600 -0.98141700 -0.65216900  
 C 4.14498800 -0.24874300 -0.18841500  
 H -1.12649300 -1.60501500 -0.74022500  
 N 4.22762800 -0.52609600 -1.47687000  
 N 2.98967100 -1.01037500 -1.82099300  
 N 0.88075400 -1.61842900 -0.94855000  
 H 2.80574800 -1.29861400 -2.77039400  
 C 5.32346600 0.29778800 0.55082700  
 H 5.10018300 1.27975600 0.97583600  
 H 5.60073000 -0.35356300 1.38348900  
 H 6.17483200 0.39113600 -0.12544400  
 C -1.69197500 0.96727700 -0.08050500  
 O -1.83616200 2.21998900 0.04391400  
 C -2.94950700 0.14228100 0.03259000  
 C -4.07267300 0.50741000 -0.72265200  
 C -3.05585200 -0.93480900 0.92126900  
 C -5.26481900 -0.20388900 -0.61234000  
 H -4.00280800 1.35011200 -1.40089600  
 C -4.25652500 -1.63504300 1.04782500  
 H -2.20472900 -1.21416900 1.53133100  
 C -5.36111700 -1.27702700 0.27639100  
 H -6.12036300 0.08022100 -1.21509800  
 H -4.32749500 -2.45799800 1.75036900  
 H -6.29179700 -1.82539400 0.36948800  
 O 2.96298700 -0.06067600 2.64535700  
 H 0.41881000 1.03380500 -0.30299000  
 H 1.31982100 -0.87467900 1.80097900  
 O 0.02161600 4.18288000 -0.24893200  
 H 0.74922600 4.00781900 0.35624700  
 H -0.60245100 3.42551700 -0.12986200

**Structure TS<sub>3</sub>**

Charge:-1, Spin: 1, Energy: -932.217505 Hartree

C -2.41856300 0.08646400 -1.14443800  
 C -1.93309100 -0.55109000 -0.00532500  
 C -0.65443300 -0.18757400 0.69885700  
 C 0.25194500 0.55278800 -0.90300800  
 C -0.67321200 1.44671900 -1.58888600  
 C -2.95516200 -1.46258600 0.36155600  
 H -0.30381900 2.41145700 -1.93491500  
 N -3.97152000 -1.42027100 -0.50767300  
 N -3.63353800 -0.46165500 -1.40675000  
 N -1.92574600 1.18767300 -1.81454400  
 C -2.98460300 -2.40178100 1.52718300  
 H -2.09271800 -3.03474800 1.54879600  
 H -3.01827100 -1.85664100 2.47516500  
 H -3.86381400 -3.04567000 1.47090600  
 H -4.25193500 -0.23907900 -2.17185300  
 C 1.51103800 1.12308800 -0.45524300  
 O 1.60242300 2.32757800 -0.16887800  
 C 2.69648200 0.22375600 -0.22858600  
 C 3.70605300 0.65797700 0.64382200  
 C 2.84600000 -1.01813100 -0.86273500  
 C 4.82735100 -0.12926300 0.88530600  
 H 3.59286600 1.61873300 1.13067800  
 C 3.97520700 -1.80260600 -0.63101500  
 H 2.09578300 -1.37398600 -1.55779300  
 C 4.96603400 -1.36324400 0.24623000  
 H 5.59345100 0.21641200 1.57033600  
 H 4.08090000 -2.75531200 -1.13741900  
 H 5.84115100 -1.97643200 0.42973000  
 H 0.05521000 -1.02681400 0.76162800  
 O -0.71557400 0.59150500 1.71852700  
 H 0.28642400 -0.43637000 -1.35124900  
 O -2.73358500 2.28707500 2.19788500  
 H -2.00982700 1.64131500 1.97125700  
 H -3.48215200 2.02055100 1.65491000

**Structure I<sub>4</sub>**

Charge:-1, Spin: 1, Energy: -932.221445 Hartree

C -2.58965600 0.20857900 -0.98309800  
 C -1.98708700 -0.58970300 -0.02609700  
 C -0.58848900 -0.28367900 0.47566800  
 C 0.10146200 0.47404800 -0.80332600  
 C -0.80128400 1.48172700 -1.46020000  
 C -2.99451400 -1.50436400 0.36224600  
 H -0.35563200 2.38800400 -1.86421700  
 N -4.12529300 -1.29262800 -0.32785100  
 N -3.86485400 -0.23354500 -1.13286000  
 N -2.07031000 1.32639000 -1.61635100  
 C -2.91917800 -2.59421800 1.38592700  
 H -2.05431400 -3.24097700 1.21289600  
 H -2.81883200 -2.18288000 2.39501600  
 H -3.82127100 -3.20771600 1.35478000  
 H -4.56961200 0.11008700 -1.76755800  
 C 1.42598000 1.06257300 -0.40304000  
 O 1.52005100 2.25962200 -0.15157600  
 C 2.61944300 0.16781300 -0.24840300  
 C 3.75480400 0.68278200 0.39782700  
 C 2.65499000 -1.15125600 -0.72412800  
 C 4.89159900 -0.09831800 0.56788100  
 H 3.72644800 1.70092900 0.76522400  
 C 3.79746100 -1.93275700 -0.55925300  
 H 1.80231900 -1.57867300 -1.23555800  
 C 4.91596000 -1.41010700 0.08785000  
 H 5.75865600 0.31095800 1.07367600  
 H 3.81266500 -2.94846300 -0.93712900  
 H 5.80271700 -2.02014900 0.21765700  
 H -0.01708800 -1.22881000 0.53978600  
 O -0.55483300 0.41252900 1.63572700  
 H 0.23442800 -0.33480000 -1.53227900  
 O -1.93529700 2.52875300 2.18530800  
 H -1.40784100 1.70192400 1.90589100  
 H -1.59775700 3.24309500 1.63644700

**Structure I<sub>5</sub>**

Charge:-1, Spin: 1, Energy: -932.249777 Hartree

C -2.77498700 0.74352100 -0.20128700  
C -2.14953700 -0.47467100 0.04841600  
C -0.69661000 -0.52229300 0.37329100  
C -0.06659200 0.80260600 -0.01101200  
C -0.88434800 1.94216700 -0.21346300  
C -3.18387400 -1.44272100 -0.00787800  
H -0.37943200 2.89447400 -0.34700300  
N -4.36116500 -0.86822500 -0.27075800  
N -4.09453000 0.46741900 -0.37710600  
N -2.20743700 1.98299100 -0.31116300  
C -3.08542800 -2.92355200 0.19125200  
H -2.32977900 -3.36260400 -0.46691700  
H -2.79971100 -3.16846200 1.21882200  
H -4.04462900 -3.39902600 -0.02098500  
H -4.83179600 1.11453600 -0.60932900  
C 1.35195700 0.96977700 -0.06706100  
O 1.94724400 2.08163600 -0.08916400  
C 2.25538300 -0.24088600 -0.13362800  
C 3.29451600 -0.38046100 0.79440100  
C 2.14123900 -1.17865900 -1.16657600  
C 4.18399000 -1.44965200 0.70860200  
H 3.39996200 0.35089600 1.58784200  
C 3.04446200 -2.23720300 -1.26686700  
H 1.35403900 -1.07130600 -1.90496600  
C 4.06320100 -2.38040700 -0.32497000  
H 4.97452500 -1.55400800 1.44363200  
H 2.95223900 -2.94810000 -2.08057500  
H 4.76047700 -3.20747200 -0.39783600  
H -0.20222400 -1.37538000 -0.08975000  
O -0.48597100 -0.81546100 1.81147900  
H -0.88396500 -0.08671200 2.30438100  
H 1.66177500 3.81131400 -0.01799200  
O 1.50180800 4.78055400 0.02190600  
H 2.34556600 5.18731600 -0.19922700

**Structure TS4**

Charge:-1, Spin: 1, Energy: -932.229181 Hartree

C -2.76285300 0.56290900 -0.54763300  
C -2.08117900 -0.53705500 0.00636800  
C -0.68904100 -0.42669200 0.22459400  
C -0.08608500 0.74625000 -0.30600000  
C -0.90783400 1.78116600 -0.81861500  
C -3.09095100 -1.52586600 0.22470200  
H -0.42587300 2.68845800 -1.16863700  
N -4.27465500 -1.06887300 -0.15916700  
N -4.06895500 0.20328500 -0.61879700  
N -2.22770200 1.73145000 -0.95896600  
C -2.93911000 -2.90156500 0.78833000  
H -2.21117300 -3.48353800 0.21571700  
H -2.58540500 -2.86715300 1.82267400  
H -3.89563300 -3.42573200 0.76643900  
H -4.84047200 0.73890500 -0.98555900  
C 1.36051500 0.97334600 -0.26257800  
O 1.84795500 2.11565200 -0.24999400  
C 2.30545000 -0.19122700 -0.25058200  
C 3.47878100 -0.10139700 0.51152600  
C 2.08833100 -1.33111600 -1.03632300  
C 4.40343800 -1.14116800 0.50862400  
H 3.65239500 0.78470000 1.11015700  
C 3.02697400 -2.36132000 -1.05747900  
H 1.19954500 -1.40225900 -1.65173700  
C 4.18073100 -2.27265300 -0.27903300  
H 5.29895200 -1.06949600 1.11534600  
H 2.85730500 -3.23112200 -1.68170800  
H 4.90528400 -3.07904800 -0.28837200  
H -0.09817100 -1.28670700 0.48603200  
O -0.51250000 -0.18702300 2.43441500  
H -1.05989000 0.60481200 2.49449100  
H 1.30202800 3.76702200 0.30320200  
O 1.14096300 4.68654500 0.59341100  
H 0.36594800 4.63705300 1.16239600

**Structure 2b**

Charge:-1, Spin: 1, Energy: -932.240893 Hartree

C 2.64237200 -0.07772900 -0.11532400  
C 1.64807200 0.91520400 0.05230000  
C 0.32316100 0.51240100 0.24168900  
C 0.09016600 -0.86740200 0.25437300  
C 1.17452400 -1.76558700 0.08372300  
C 2.35940600 2.16158300 -0.00694500  
H 0.97554000 -2.83157200 0.10053200  
N 3.64869700 1.93630000 -0.18979100  
N 3.81592200 0.57870400 -0.25967500  
N 2.43812700 -1.40461000 -0.11097000  
C 1.79389200 3.54192900 0.08341700  
H 1.60895900 3.94493200 -0.91837400  
H 0.83805700 3.52773700 0.61539200  
H 2.49326500 4.21266800 0.58688300  
H 4.73954700 0.19090600 -0.37780800  
C -1.24837600 -1.46630800 0.52624300  
O -1.33181300 -2.52335900 1.14700800

C -2.48550100 -0.79241200 0.02703500  
C -3.68326700 -0.97686400 0.73407400  
C -2.49872000 -0.05054500 -1.16164100  
C -4.86668700 -0.41263400 0.27200400  
H -3.67042800 -1.55771800 1.64832800  
C -3.69081000 0.49322800 -1.63628400  
H -1.58606000 0.08381900 -1.72855700  
C -4.87292100 0.32033500 -0.91761900  
H -5.78454000 -0.54490300 0.83317800  
H -3.69534700 1.05264200 -2.56451300  
H -5.79742000 0.75335700 -1.28243900  
H -0.45690700 1.25895800 0.44003400  
O -1.30026200 2.97369500 1.17908600  
H -2.18618900 3.07976100 1.54545300  
H 3.78197800 -2.71975700 -0.35726400  
O 4.46896100 -3.40178900 -0.52249500  
H 4.61336700 -3.82315900 0.33114800

## 8. References

- 1 J. C. Castillo, H. A. Rosero and J. Portilla, *RSC Adv*, 2017, **7**, 28483–28488.
- 2 J. C. Castillo, A. Tigreros and J. Portilla, *Journal of Organic Chemistry*, 2018, **83**, 10887–10897.
- 3 A. Tigreros, S. L. Aranzazu, N. F. Bravo, J. Zapata-Rivera and J. Portilla, *RSC Adv*, 2020, **10**, 39542–39552.
- 4 S. Aranzazu, A. Tigreros, A. Arias-g, J. Zapata-rivera and J. Portilla, *J Org Chem*, 2022, **87**, 9839–9850.
- 5 L. Palatinus and G. Chapuis, *J. Appl. Crystallogr.*, 2007, **40**, 786–790.
- 6 G. M. Sheldrick, *Acta Crystallogr., Sect. C: Struct. Chem.*, 2015, **C71**, 3–8.
- 7 C. F. Macrae, I. J. Bruno, J. A. Chisholm, P. R. Edgington, P. McCabe, E. Pidcock, L. Rodriguez-Monge, R. Taylor, J. van de Streek and P. A. Wood, *J. Appl. Crystallogr.*, 2008, **41**, 466–470.
- 8 C. Würth, M. Grabolle, J. Pauli, M. Spieles and U. Resch-Genger, *Nat. Protoc.*, 2013, **8**, 1535–1550.
- 9 T. N. Moshkina, E. V Nosova, A. E. Kopotilova, M. I. Savchuk, I. L. Nikonov, D. S. Kopchuk, P. A. Slepukhin, G. A. Kim, G. N. Lipunova and V. N. Charushin, *J. Photochem. Photobiol., A*, 2022, **429**, 113917.
- 10 M. J. Frisch, G. W. Trucks, H. B. Schlegel, G. E. Scuseria, M. A. Robb, J. R. Cheeseman, G. Scalmani, V. Barone, G. A. Petersson, H. Nakatsuji, X. Li, M. Caricato, A. V Marenich, J. Bloino, B. G. Janesko, R. Gomperts, B. Mennucci, H. P. Hratchian, J. V Ortiz, A. F. Izmaylov, J. L. Sonnenberg, D. Williams-Young, F. Ding, F. Lipparini, F. Egidi, J. Goings, B. Peng, A. Petrone, T. Henderson, D. Ranasinghe, V. G. Zakrzewski, J. Gao, N. Rega, G. Zheng, W. Liang, M. Hada, M. Ehara, K. Toyota, R. Fukuda, J. Hasegawa, M. Ishida, T. Nakajima, Y. Honda, O. Kitao, H. Nakai, T. Vreven, K. Throssell, J. A. Montgomery Jr., J. E. Peralta, F. Ogliaro, M. J. Bearpark, J. J. Heyd, E. N. Brothers, K. N. Kudin, V. N. Staroverov, T. A. Keith, R. Kobayashi, J. Normand, K. Raghavachari, A. P. Rendell, J. C. Burant, S. S. Iyengar, J. Tomasi, M. Cossi, J. M. Millam, M. Klene, C. Adamo, R. Cammi, J. W. Ochterski, R. L. Martin, K. Morokuma, O. Farkas, J. B. Foresman and D. J. Fox, .
- 11 A. D. Becke, *J. Chem. Phys.*, 1993, **98**, 5648–5652.
- 12 R. Dennington, T. A. Keith and J. M. Millam, *GaussView*, 2019.
